# Supplementary material for: Progress in genetic association studies of plasma lipids
Source: PubMed Central journal article supplement — Curr Opin Lipidol. 2013 Mar 14;24(2):123–8. doi: 10.1097/MOL.0b013e32835df2d6 (PMC4222789; doi:10.1097/mol.0b013e32835df2d6), 2013-03-14
Supplement: colip-24-123-s002.pdf [file colip-24-123-s002.pdf]

Table S6 Combined biological process VLAD results, triglyceride, total cholesterol, LDL chol

| GO Term                                                         | M     |
|-----------------------------------------------------------------|-------|
| <a href="#">GO:0008150: biological process</a>                  | 29612 |
| <a href="#">GO:0008152: metabolic process</a>                   | 14817 |
| <a href="#">GO:0044710: single-organism metabolic process</a>   | 14505 |
| <a href="#">GO:0044238: primary metabolic process</a>           | 13667 |
| <a href="#">GO:0071704: organic substance metabolic process</a> | 14197 |

---

|                                                        |       |
|--------------------------------------------------------|-------|
| <a href="#">GO:0044237: cellular metabolic process</a> | 12556 |
|--------------------------------------------------------|-------|

---

|                                                              |      |
|--------------------------------------------------------------|------|
| <a href="#">GO:0044281: small molecule metabolic process</a> | 3455 |
|--------------------------------------------------------------|------|

---

|                                                     |      |
|-----------------------------------------------------|------|
| <a href="#">GO:0006629: lipid metabolic process</a> | 1762 |
|-----------------------------------------------------|------|

---

|                                                              |      |
|--------------------------------------------------------------|------|
| <a href="#">GO:0065008: regulation of biological quality</a> | 3451 |
|--------------------------------------------------------------|------|

---

|                                                  |      |
|--------------------------------------------------|------|
| <a href="#">GO:0009058: biosynthetic process</a> | 6142 |
|--------------------------------------------------|------|

---

|                                                                    |      |
|--------------------------------------------------------------------|------|
| <a href="#">GO:1901576: organic substance biosynthetic process</a> | 5968 |
|--------------------------------------------------------------------|------|

---

|  |      |
|--|------|
|  | 5811 |
|--|------|

---

|                                                           |      |
|-----------------------------------------------------------|------|
| <a href="#">GO:0044249: cellular biosynthetic process</a> | 5811 |
|-----------------------------------------------------------|------|

---

---

|                                                                       |      |
|-----------------------------------------------------------------------|------|
| <a href="#">GO:0042221: response to chemical stimulus</a>             | 3988 |
| <hr/>                                                                 |      |
| <a href="#">GO:0048518: positive regulation of biological process</a> | 5136 |
| <hr/>                                                                 |      |
| <a href="#">GO:0042592: homeostatic process</a>                       | 1700 |
| <hr/>                                                                 |      |
| <a href="#">GO:0032879: regulation of localization</a>                | 1830 |
| <hr/>                                                                 |      |
| <a href="#">GO:0044255: cellular lipid metabolic process</a>          | 1274 |
| <hr/>                                                                 |      |
| <a href="#">GO:0033036: macromolecule localization</a>                | 2555 |
| <hr/>                                                                 |      |
| <a href="#">GO:0048878: chemical homeostasis</a>                      | 1156 |
| <hr/>                                                                 |      |
| <a href="#">GO:0010033: response to organic substance</a>             | 2789 |
| <hr/>                                                                 |      |
| <a href="#">GO:0055088: lipid homeostasis</a>                         | 115  |
| <hr/>                                                                 |      |
| <a href="#">GO:0009893: positive regulation of metabolic process</a>  | 2783 |
| <hr/>                                                                 |      |
| <a href="#">GO:0065009: regulation of molecular function</a>          | 2329 |
| <hr/>                                                                 |      |
| <a href="#">GO:0050790: regulation of catalytic activity</a>          | 1840 |
| <hr/>                                                                 |      |

|                                                                         |      |
|-------------------------------------------------------------------------|------|
| <a href="#">GO:1901575: organic substance catabolic process</a>         | 2254 |
| <a href="#">GO:0043933: macromolecular complex subunit organization</a> | 1414 |
|                                                                         | 2457 |
| <a href="#">GO:0006066: alcohol metabolic process</a>                   | 374  |
| <a href="#">GO:1901615: organic hydroxy compound metabolic process</a>  | 471  |
| <a href="#">GO:0006082: organic acid metabolic process</a>              | 1635 |
| <a href="#">GO:0016042: lipid catabolic process</a>                     | 307  |
| <a href="#">GO:0070887: cellular response to chemical stimulus</a>      | 2141 |
| <a href="#">GO:0010876: lipid localization</a>                          | 272  |
| <a href="#">GO:0008203: cholesterol metabolic process</a>               | 126  |
| <a href="#">GO:0016125: sterol metabolic process</a>                    | 141  |
| <a href="#">GO:0008202: steroid metabolic process</a>                   | 322  |
| <a href="#">GO:0051049: regulation of transport</a>                     | 1321 |
| <a href="#">GO:0019637: organophosphate metabolic process</a>           | 1497 |
| <a href="#">GO:0043436: oxoacid metabolic process</a>                   | 1617 |
| <a href="#">GO:0008610: lipid biosynthetic process</a>                  | 790  |

---

|                                                                              |      |
|------------------------------------------------------------------------------|------|
| <a href="#">GO:0044283: small molecule biosynthetic process</a>              | 680  |
| <a href="#">GO:0044711: single-organism biosynthetic process</a>             | 702  |
| <a href="#">GO:0019752: carboxylic acid metabolic process</a>                | 1485 |
| <a href="#">GO:0032787: monocarboxylic acid metabolic process</a>            | 621  |
| <a href="#">GO:0006644: phospholipid metabolic process</a>                   | 526  |
| <a href="#">GO:0046486: glycerolipid metabolic process</a>                   | 454  |
| <a href="#">GO:0070328: triglyceride homeostasis</a>                         | 31   |
| <a href="#">GO:0055090: acylglycerol homeostasis</a>                         | 32   |
| <a href="#">GO:0055092: sterol homeostasis</a>                               | 82   |
| <a href="#">GO:0042632: cholesterol homeostasis</a>                          | 82   |
| <a href="#">GO:0006869: lipid transport</a>                                  | 247  |
| <a href="#">GO:0044092: negative regulation of molecular function</a>        | 798  |
| <a href="#">GO:0043086: negative regulation of catalytic activity</a>        | 607  |
| <a href="#">GO:0042157: lipoprotein metabolic process</a>                    | 172  |
| <a href="#">GO:0019216: regulation of lipid metabolic process</a>            | 282  |
| <a href="#">GO:0097006: regulation of plasma lipoprotein particle levels</a> | 60   |
| <a href="#">GO:0006631: fatty acid metabolic process</a>                     | 434  |
| <a href="#">GO:0071827: plasma lipoprotein particle organization</a>         | 33   |

---

|                                                                            |      |
|----------------------------------------------------------------------------|------|
| <a href="#">GO:0071825: protein-lipid complex subunit organization</a>     | 33   |
| <a href="#">GO:0034369: plasma lipoprotein particle remodeling</a>         | 27   |
| <a href="#">GO:0034368: protein-lipid complex remodeling</a>               | 27   |
| <a href="#">GO:0034367: macromolecular complex remodeling</a>              | 27   |
| <a href="#">GO:0051338: regulation of transferase activity</a>             | 844  |
| <a href="#">GO:0042325: regulation of phosphorylation</a>                  | 1142 |
| <a href="#">GO:0030334: regulation of cell migration</a>                   | 563  |
| <a href="#">GO:2000145: regulation of cell motility</a>                    | 588  |
| <a href="#">GO:0048585: negative regulation of response to stimulus</a>    | 1148 |
| <a href="#">GO:0040012: regulation of locomotion</a>                       | 632  |
| <a href="#">GO:0051270: regulation of cellular component movement</a>      | 635  |
| <a href="#">GO:0030301: cholesterol transport</a>                          | 58   |
| <a href="#">GO:0015918: sterol transport</a>                               | 58   |
| <a href="#">GO:0015850: organic hydroxy compound transport</a>             | 84   |
| <a href="#">GO:0045834: positive regulation of lipid metabolic process</a> | 123  |
| <a href="#">GO:0009894: regulation of catabolic process</a>                | 725  |
| <a href="#">GO:0055114: oxidation-reduction process</a>                    | 686  |
| <a href="#">GO:0006639: acylglycerol metabolic process</a>                 | 114  |
| <a href="#">GO:0006638: neutral lipid metabolic process</a>                | 116  |
| <a href="#">GO:0006641: triglyceride metabolic process</a>                 | 107  |
| <a href="#">GO:0072330: monocarboxylic acid biosynthetic process</a>       | 268  |
| <a href="#">GO:0016053: organic acid biosynthetic process</a>              | 484  |
| <a href="#">GO:0046394: carboxylic acid biosynthetic process</a>           | 484  |
| <a href="#">GO:0006633: fatty acid biosynthetic process</a>                | 197  |
| <a href="#">GO:0009896: positive regulation of catabolic process</a>       | 185  |
| <a href="#">GO:0044242: cellular lipid catabolic process</a>               | 184  |
| <a href="#">GO:0006897: endocytosis</a>                                    | 405  |
| <a href="#">GO:0006898: receptor-mediated endocytosis</a>                  | 125  |

|                                                                                 |     |
|---------------------------------------------------------------------------------|-----|
| <a href="#">GO:0009743: response to carbohydrate stimulus</a>                   | 246 |
| <a href="#">GO:0032374: regulation of cholesterol transport</a>                 | 32  |
| <a href="#">GO:0032371: regulation of sterol transport</a>                      | 32  |
| <a href="#">GO:0032368: regulation of lipid transport</a>                       | 74  |
| <a href="#">GO:0043691: reverse cholesterol transport</a>                       | 19  |
| <a href="#">GO:0034381: plasma lipoprotein particle clearance</a>               | 38  |
| <a href="#">GO:0034375: high-density lipoprotein particle remodeling</a>        | 15  |
| <a href="#">GO:0051348: negative regulation of transferase activity</a>         | 228 |
| <a href="#">GO:0034374: low-density lipoprotein particle remodeling</a>         | 13  |
| <a href="#">GO:0048844: artery morphogenesis</a>                                | 59  |
| <a href="#">GO:0060840: artery development</a>                                  | 71  |
| <a href="#">GO:0034372: very-low-density lipoprotein particle remodeling</a>    | 7   |
| <a href="#">GO:0034370: triglyceride-rich lipoprotein particle remodeling</a>   | 10  |
| <a href="#">GO:0046470: phosphatidylcholine metabolic process</a>               | 65  |
| <a href="#">GO:0042439: ethanolamine-containing compound metabolic process</a>  | 94  |
| <a href="#">GO:0031400: negative regulation of protein modification process</a> | 404 |
| <a href="#">GO:0006650: glycerophospholipid metabolic process</a>               | 365 |
| <a href="#">GO:0031331: positive regulation of cellular catabolic process</a>   | 132 |
| <a href="#">GO:0044106: cellular amine metabolic process</a>                    | 157 |
| <a href="#">GO:0006576: cellular biogenic amine metabolic process</a>           | 157 |
| <a href="#">GO:0009308: amine metabolic process</a>                             | 201 |
| <a href="#">GO:0055091: phospholipid homeostasis</a>                            | 9   |
| <a href="#">GO:0015914: phospholipid transport</a>                              | 41  |
| <a href="#">GO:0015748: organophosphate ester transport</a>                     | 66  |
| <a href="#">GO:0046890: regulation of lipid biosynthetic process</a>            | 133 |
| <a href="#">GO:0019218: regulation of steroid metabolic process</a>             | 99  |
| <a href="#">GO:0042158: lipoprotein biosynthetic process</a>                    | 108 |
| <a href="#">GO:0034377: plasma lipoprotein particle assembly</a>                | 15  |
| <a href="#">GO:0065005: protein-lipid complex assembly</a>                      | 15  |
| <a href="#">GO:0033500: carbohydrate homeostasis</a>                            | 150 |
| <a href="#">GO:0042593: glucose homeostasis</a>                                 | 150 |
| <a href="#">GO:0006636: unsaturated fatty acid biosynthetic process</a>         | 68  |
| <a href="#">GO:0033559: unsaturated fatty acid metabolic process</a>            | 110 |
| <a href="#">GO:0010874: regulation of cholesterol efflux</a>                    | 17  |

|                                                                                        |     |
|----------------------------------------------------------------------------------------|-----|
| <a href="#">GO:0010743: regulation of macrophage derived foam cell differentiation</a> | 42  |
| <a href="#">GO:0019433: triglyceride catabolic process</a>                             | 23  |
| <a href="#">GO:0046464: acylglycerol catabolic process</a>                             | 26  |
| <a href="#">GO:0046461: neutral lipid catabolic process</a>                            | 26  |
| <a href="#">GO:0010906: regulation of glucose metabolic process</a>                    | 104 |
| <a href="#">GO:0010675: regulation of cellular carbohydrate metabolic process</a>      | 127 |
| <a href="#">GO:0006109: regulation of carbohydrate metabolic process</a>               | 132 |
| <a href="#">GO:0030336: negative regulation of cell migration</a>                      | 165 |
| <a href="#">GO:2000146: negative regulation of cell motility</a>                       | 167 |
| <a href="#">GO:0046503: glycerolipid catabolic process</a>                             | 32  |
|                                                                                        | 173 |
|                                                                                        | 192 |
|                                                                                        | 192 |
| <a href="#">GO:0045862: positive regulation of proteolysis</a>                         | 85  |
| <a href="#">GO:0051271: negative regulation of cellular component movement</a>         | 173 |
| <a href="#">GO:0040013: negative regulation of locomotion</a>                          | 192 |
| <a href="#">GO:0033344: cholesterol efflux</a>                                         | 26  |
| <a href="#">GO:0042159: lipoprotein catabolic process</a>                              | 11  |
| <a href="#">GO:0045940: positive regulation of steroid metabolic process</a>           | 28  |
| <a href="#">GO:0090181: regulation of cholesterol metabolic process</a>                | 33  |
| <a href="#">GO:0034380: high-density lipoprotein particle assembly</a>                 | 6   |
| <a href="#">GO:0033700: phospholipid efflux</a>                                        | 12  |
| <a href="#">GO:0032489: regulation of Cdc42 protein signal transduction</a>            | 21  |
| <a href="#">GO:0032376: positive regulation of cholesterol transport</a>               | 13  |
| <a href="#">GO:0032373: positive regulation of sterol transport</a>                    | 13  |
| <a href="#">GO:0032370: positive regulation of lipid transport</a>                     | 37  |
| <a href="#">GO:0009395: phospholipid catabolic process</a>                             | 36  |
| <a href="#">GO:0034384: high-density lipoprotein particle clearance</a>                | 7   |
| <a href="#">GO:0010873: positive regulation of cholesterol esterification</a>          | 7   |
| <a href="#">GO:0010872: regulation of cholesterol esterification</a>                   | 9   |
| <a href="#">GO:0045540: regulation of cholesterol biosynthetic process</a>             | 22  |
| <a href="#">GO:0043651: linoleic acid metabolic process</a>                            | 8   |
| <a href="#">GO:0036109: alpha-linolenic acid metabolic process</a>                     | 11  |
| <a href="#">GO:0034382: chylomicron remnant clearance</a>                              | 9   |
| <a href="#">GO:0071830: triglyceride-rich lipoprotein particle clearance</a>           | 9   |
| <a href="#">GO:0010875: positive regulation of cholesterol efflux</a>                  | 11  |
| <a href="#">GO:0010885: regulation of cholesterol storage</a>                          | 25  |
|                                                                                        | 32  |
| <a href="#">GO:0010907: positive regulation of glucose metabolic process</a>           | 32  |
| <a href="#">GO:0045923: positive regulation of fatty acid metabolic process</a>        | 36  |



|                                                                                            |      |
|--------------------------------------------------------------------------------------------|------|
| <a href="#">GO:0010676: positive regulation of cellular carbohydrate metabolic process</a> | 42   |
| <a href="#">GO:0030317: sperm motility</a>                                                 | 38   |
| <a href="#">GO:0014912: negative regulation of smooth muscle cell migration</a>            | 10   |
| <a href="#">GO:0042953: lipoprotein transport</a>                                          | 13   |
| <a href="#">GO:0050996: positive regulation of lipid catabolic process</a>                 | 26   |
| <a href="#">GO:0010886: positive regulation of cholesterol storage</a>                     | 19   |
| <a href="#">GO:0010884: positive regulation of lipid storage</a>                           | 27   |
|                                                                                            | 29   |
|                                                                                            | 35   |
| <a href="#">GO:0006775: fat-soluble vitamin metabolic process</a>                          | 28   |
| <a href="#">GO:0044707: single-multicellular organism process</a>                          | 8030 |
| <br>                                                                                       |      |
| <a href="#">GO:0032501: multicellular organismal process</a>                               | 8067 |
| <br>                                                                                       |      |
| <a href="#">GO:0019222: regulation of metabolic process</a>                                | 7178 |
| <br>                                                                                       |      |
| <a href="#">GO:0080090: regulation of primary metabolic process</a>                        | 6458 |
| <br>                                                                                       |      |
| <a href="#">GO:0051179: localization</a>                                                   | 5992 |
| <br>                                                                                       |      |
| <a href="#">GO:1901360: organic cyclic compound metabolic process</a>                      | 6677 |
| <br>                                                                                       |      |

---

|                                                                               |      |
|-------------------------------------------------------------------------------|------|
| <a href="#">GO:0006810: transport</a>                                         | 4771 |
| <hr/>                                                                         |      |
| <a href="#">GO:0051234: establishment of localization</a>                     | 4875 |
| <hr/>                                                                         |      |
| <a href="#">GO:0031323: regulation of cellular metabolic process</a>          | 6511 |
| <hr/>                                                                         |      |
| <a href="#">GO:0048519: negative regulation of biological process</a>         | 4507 |
| <hr/>                                                                         |      |
| <a href="#">GO:0071702: organic substance transport</a>                       | 2430 |
| <hr/>                                                                         |      |
| <a href="#">GO:0048523: negative regulation of cellular process</a>           | 4093 |
| <hr/>                                                                         |      |
| <a href="#">GO:0006793: phosphorus metabolic process</a>                      | 2720 |
| <hr/>                                                                         |      |
| <a href="#">GO:0006796: phosphate-containing compound metabolic process</a>   | 2610 |
| <hr/>                                                                         |      |
| <a href="#">GO:0051239: regulation of multicellular organismal process</a>    | 2790 |
| <hr/>                                                                         |      |
| <a href="#">GO:0050793: regulation of developmental process</a>               | 2235 |
| <hr/>                                                                         |      |
| <a href="#">GO:0031325: positive regulation of cellular metabolic process</a> | 2626 |
| <hr/>                                                                         |      |
| <a href="#">GO:0016192: vesicle-mediated transport</a>                        | 1300 |
| <hr/>                                                                         |      |

|                                                                                                       |      |
|-------------------------------------------------------------------------------------------------------|------|
| <a href="#">GO:0009719: response to endogenous stimulus</a>                                           | 1708 |
| <a href="#">GO:0019220: regulation of phosphate metabolic process</a>                                 | 1614 |
| <a href="#">GO:0051174: regulation of phosphorus metabolic process</a>                                | 1626 |
| <a href="#">GO:0045595: regulation of cell differentiation</a>                                        | 1576 |
| <a href="#">GO:0009725: response to hormone stimulus</a>                                              | 1157 |
| <a href="#">GO:0031667: response to nutrient levels</a>                                               | 473  |
| <a href="#">GO:0009991: response to extracellular stimulus</a>                                        | 519  |
| <a href="#">GO:0010243: response to organic nitrogen</a>                                              | 1044 |
| <a href="#">GO:0051241: negative regulation of multicellular organismal process</a>                   | 499  |
| <a href="#">GO:0043434: response to peptide hormone stimulus</a>                                      | 607  |
| <a href="#">GO:1901652: response to peptide</a>                                                       | 621  |
| <a href="#">GO:0031329: regulation of cellular catabolic process</a>                                  | 600  |
| <a href="#">GO:0006694: steroid biosynthetic process</a>                                              | 149  |
| <a href="#">GO:0051346: negative regulation of hydrolase activity</a>                                 | 273  |
| <a href="#">GO:0009746: response to hexose stimulus</a>                                               | 173  |
| <a href="#">GO:0034284: response to monosaccharide stimulus</a>                                       | 196  |
|                                                                                                       | 348  |
| <a href="#">GO:0032868: response to insulin stimulus</a>                                              | 387  |
| <a href="#">GO:0033673: negative regulation of kinase activity</a>                                    | 211  |
| <a href="#">GO:0030299: intestinal cholesterol absorption</a>                                         | 8    |
| <a href="#">GO:0044241: lipid digestion</a>                                                           | 14   |
| <a href="#">GO:0050892: intestinal absorption</a>                                                     | 28   |
| <a href="#">GO:0022600: digestive system process</a>                                                  | 50   |
| <a href="#">GO:0007586: digestion</a>                                                                 | 119  |
| <a href="#">GO:0042176: regulation of protein catabolic process</a>                                   | 247  |
| <a href="#">GO:0009749: response to glucose stimulus</a>                                              | 162  |
| <a href="#">GO:0032803: regulation of low-density lipoprotein particle receptor catabolic process</a> | 5    |
| <a href="#">GO:0030300: regulation of intestinal cholesterol absorption</a>                           | 6    |
| <a href="#">GO:2000644: regulation of receptor catabolic process</a>                                  | 6    |
| <a href="#">GO:0034383: low-density lipoprotein particle clearance</a>                                | 15   |

|                                                                                               |     |
|-----------------------------------------------------------------------------------------------|-----|
| <a href="#">GO:0044058: regulation of digestive system process</a>                            | 30  |
| <a href="#">GO:0006695: cholesterol biosynthetic process</a>                                  | 41  |
| <a href="#">GO:0016126: sterol biosynthetic process</a>                                       | 52  |
| <a href="#">GO:0050810: regulation of steroid biosynthetic process</a>                        | 73  |
| <a href="#">GO:0009267: cellular response to starvation</a>                                   | 103 |
| <a href="#">GO:0045732: positive regulation of protein catabolic process</a>                  | 115 |
| <a href="#">GO:0010984: regulation of lipoprotein particle clearance</a>                      | 13  |
| <a href="#">GO:0030804: positive regulation of cyclic nucleotide biosynthetic process</a>     | 73  |
| <a href="#">GO:1900373: positive regulation of purine nucleotide biosynthetic process</a>     | 74  |
| <a href="#">GO:0030810: positive regulation of nucleotide biosynthetic process</a>            | 74  |
| <a href="#">GO:0030801: positive regulation of cyclic nucleotide metabolic process</a>        | 75  |
| <a href="#">GO:1900544: positive regulation of purine nucleotide metabolic process</a>        | 77  |
| <a href="#">GO:0045981: positive regulation of nucleotide metabolic process</a>               | 77  |
|                                                                                               | 107 |
|                                                                                               | 108 |
|                                                                                               | 108 |
|                                                                                               | 117 |
| <a href="#">GO:0046889: positive regulation of lipid biosynthetic process</a>                 | 55  |
| <a href="#">GO:0015758: glucose transport</a>                                                 | 67  |
| <a href="#">GO:0046164: alcohol catabolic process</a>                                         | 67  |
| <a href="#">GO:0008645: hexose transport</a>                                                  | 68  |
| <a href="#">GO:0015749: monosaccharide transport</a>                                          | 70  |
| <a href="#">GO:1901616: organic hydroxy compound catabolic process</a>                        | 76  |
|                                                                                               | 101 |
| <a href="#">GO:0010949: negative regulation of intestinal phytosterol absorption</a>          | 2   |
| <a href="#">GO:0045796: negative regulation of intestinal cholesterol absorption</a>          | 2   |
| <a href="#">GO:0035376: sterol import</a>                                                     | 3   |
| <a href="#">GO:0070508: cholesterol import</a>                                                | 3   |
| <a href="#">GO:0035382: sterol transmembrane transport</a>                                    | 3   |
| <a href="#">GO:0046323: glucose import</a>                                                    | 4   |
| <a href="#">GO:0010989: negative regulation of low-density lipoprotein particle clearance</a> | 4   |
| <a href="#">GO:0051005: negative regulation of lipoprotein lipase activity</a>                | 6   |
| <a href="#">GO:0010985: negative regulation of lipoprotein particle clearance</a>             | 7   |
| <a href="#">GO:0010988: regulation of low-density lipoprotein particle clearance</a>          | 7   |
| <a href="#">GO:0010867: positive regulation of triglyceride biosynthetic process</a>          | 11  |
| <a href="#">GO:0032375: negative regulation of cholesterol transport</a>                      | 11  |
| <a href="#">GO:0032372: negative regulation of sterol transport</a>                           | 11  |
| <a href="#">GO:0006707: cholesterol catabolic process</a>                                     | 13  |
| <a href="#">GO:0016127: sterol catabolic process</a>                                          | 13  |

|                                                                                                 |       |
|-------------------------------------------------------------------------------------------------|-------|
| <a href="#">GO:0060192: negative regulation of lipase activity</a>                              | 13    |
| <a href="#">GO:0010866: regulation of triglyceride biosynthetic process</a>                     | 16    |
| <a href="#">GO:0090208: positive regulation of triglyceride metabolic process</a>               | 17    |
| <a href="#">GO:0060457: negative regulation of digestive system process</a>                     | 18    |
| <a href="#">GO:0006699: bile acid biosynthetic process</a>                                      | 23    |
|                                                                                                 | 26    |
|                                                                                                 | 27    |
|                                                                                                 | 27    |
| <a href="#">GO:0010745: negative regulation of macrophage derived foam cell differentiation</a> | 13    |
| <a href="#">GO:0032367: intracellular cholesterol transport</a>                                 | 8     |
| <a href="#">GO:0032366: intracellular sterol transport</a>                                      | 8     |
| <a href="#">GO:0009750: response to fructose stimulus</a>                                       | 13    |
| <a href="#">GO:0032365: intracellular lipid transport</a>                                       | 18    |
|                                                                                                 | 23    |
|                                                                                                 | 27    |
|                                                                                                 | 23018 |

---

[GO:0009987: cellular process](#) 23018

---

|                                                                                    |     |
|------------------------------------------------------------------------------------|-----|
|                                                                                    | 836 |
| <a href="#">GO:0060341: regulation of cellular localization</a>                    | 836 |
| <a href="#">GO:0010563: negative regulation of phosphorus metabolic process</a>    | 343 |
| <a href="#">GO:0045936: negative regulation of phosphate metabolic process</a>     | 343 |
| <a href="#">GO:0001933: negative regulation of protein phosphorylation</a>         | 272 |
| <a href="#">GO:0042326: negative regulation of phosphorylation</a>                 | 287 |
| <a href="#">GO:0006469: negative regulation of protein kinase activity</a>         | 200 |
| <a href="#">GO:0007568: aging</a>                                                  | 380 |
| <a href="#">GO:0071900: regulation of protein serine/threonine kinase activity</a> | 502 |

|                                                                                         |       |
|-----------------------------------------------------------------------------------------|-------|
| <a href="#">GO:0032269: negative regulation of cellular protein metabolic process</a>   | 539   |
| <a href="#">GO:0043405: regulation of MAP kinase activity</a>                           | 334   |
| <a href="#">GO:0048259: regulation of receptor-mediated endocytosis</a>                 | 51    |
| <a href="#">GO:0043407: negative regulation of MAP kinase activity</a>                  | 86    |
|                                                                                         | 119   |
| <a href="#">GO:0046165: alcohol biosynthetic process</a>                                | 127   |
| <a href="#">GO:0060191: regulation of lipase activity</a>                               | 129   |
| <a href="#">GO:0031669: cellular response to nutrient levels</a>                        | 142   |
| <a href="#">GO:0042594: response to starvation</a>                                      | 149   |
| <a href="#">GO:0031664: regulation of lipopolysaccharide-mediated signaling pathway</a> | 13    |
|                                                                                         | 31    |
|                                                                                         | 32    |
| <a href="#">GO:0065007: biological regulation</a>                                       | 14777 |
|                                                                                         |       |
| <a href="#">GO:0050789: regulation of biological process</a>                            | 13977 |
|                                                                                         |       |
|                                                                                         | 5118  |
|                                                                                         |       |
| <a href="#">GO:0009889: regulation of biosynthetic process</a>                          | 5118  |
|                                                                                         |       |
|                                                                                         | 5077  |
|                                                                                         |       |
|                                                                                         | 4326  |
|                                                                                         |       |
| <a href="#">GO:0034645: cellular macromolecule biosynthetic process</a>                 | 4326  |
|                                                                                         |       |

|                                                                                    |      |
|------------------------------------------------------------------------------------|------|
|                                                                                    | 4397 |
| <a href="#">GO:0009059: macromolecule biosynthetic process</a>                     | 4397 |
| <a href="#">GO:0071310: cellular response to organic substance</a>                 | 1692 |
| <a href="#">GO:0033993: response to lipid</a>                                      | 949  |
|                                                                                    | 1011 |
| <a href="#">GO:0008654: phospholipid biosynthetic process</a>                      | 302  |
| <a href="#">GO:0045913: positive regulation of carbohydrate metabolic process</a>  | 49   |
| <a href="#">GO:0019217: regulation of fatty acid metabolic process</a>             | 103  |
| <a href="#">GO:0019934: cGMP-mediated signaling</a>                                | 5    |
| <a href="#">GO:0045723: positive regulation of fatty acid biosynthetic process</a> | 15   |
|                                                                                    | 17   |
| <a href="#">GO:0002021: response to dietary excess</a>                             | 17   |
|                                                                                    | 27   |
|                                                                                    | 29   |
| <a href="#">GO:0010470: regulation of gastrulation</a>                             | 32   |
| <a href="#">GO:0034405: response to fluid shear stress</a>                         | 32   |
|                                                                                    | 36   |

k is the number of genes in the query set annotated to that node, and M is the number of genes in the annotation dataset 12<sup>th</sup> November 2012 and GO ontology from 27<sup>th</sup> November 2012.

Individual lipid trait SNP datasets associated with each of the listed GO terms. HDL-C: HDL cholesterol

---

---

triglyceride and HDL cholesterol trait associated genes

---

**TG**

| <b>p</b>   | <b>k</b> | <b>genes</b>                                                                                                                                                                                             | <b>p</b> |
|------------|----------|----------------------------------------------------------------------------------------------------------------------------------------------------------------------------------------------------------|----------|
| 1          | 29       | ANGPTL3, APOA1, APOB, APOE, CAPN3, CETP, CTF1, CYP26A1, FADS1, FADS2, FADS3, *FRMD5, GALNT2, GCKR, IRS1, JMJD1C, LIPC, LPL, LRP1, MAP3K1, MLXIPL, MSL2, NAT2, PINX1, PLA2G6, PLTP, TRIB1, TYW1B, *ZNF664 | 1        |
| 0.00000768 | 26       | ANGPTL3, APOA1, APOB, APOE, CAPN3, CETP, *CYP26A1, FADS1, FADS2, FADS3, GALNT2, GCKR, IRS1, JMJD1C, LIPC, LPL, LRP1, MAP3K1, MLXIPL, MSL2, NAT2, PINX1, PLA2G6, PLTP, TYW1B, ZNF664                      | 0.000237 |
| 0.00000468 | 26       | ANGPTL3, APOA1, APOB, APOE, CAPN3, CETP, CYP26A1, FADS1, FADS2, FADS3, GALNT2, GCKR, IRS1, JMJD1C, LIPC, LPL, LRP1, MAP3K1, MLXIPL, MSL2, NAT2, PINX1, PLA2G6, PLTP, TYW1B, ZNF664                       | 0.000423 |
| 0.00000913 | 25       | ANGPTL3, APOA1, APOB, APOE, CAPN3, CETP, CYP26A1, FADS1, FADS2, FADS3, GALNT2, GCKR, IRS1, JMJD1C, LIPC, LPL, LRP1, MAP3K1, MLXIPL, MSL2, PINX1, PLA2G6, PLTP, TYW1B, ZNF664                             | 0.000854 |
| 0.0000209  | 25       | ANGPTL3, APOA1, APOB, APOE, CAPN3, CETP, CYP26A1, FADS1, FADS2, FADS3, GALNT2, GCKR, IRS1, JMJD1C, LIPC, LPL, LRP1, MAP3K1, MLXIPL, MSL2, PINX1, PLA2G6, PLTP, TYW1B, ZNF664                             | -        |

---



|            |    |                                                                                                                                                                       |           |
|------------|----|-----------------------------------------------------------------------------------------------------------------------------------------------------------------------|-----------|
| 0.00000992 | 24 | ANGPTL3, APOA1, APOB, APOE, CETP, CYP26A1, FADS1, FADS2, FADS3, GALNT2, GCKR, JMJD1C, LIPC, LPL, LRP1, MAP3K1, MLXIPL, MSL2, NAT2, PINX1, PLA2G6, PLTP, TYW1B, ZNF664 | 0.0000102 |
| 1.72E-09   | 17 | ANGPTL3, *APOA1, *APOB, *APOE, *CETP, *CYP26A1, *FADS1, *FADS2, FADS3, *GCKR, LIPC, *LPL, LRP1, *MLXIPL, *NAT2, *PLA2G6, PLTP                                         | 1.96E-12  |
| 1.37E-11   | 15 | ANGPTL3, *APOA1, *APOB, *APOE, *CETP, CYP26A1, FADS1, FADS2, FADS3, IRS1, LIPC, *LPL, LRP1, PLA2G6, *PLTP                                                             | 7.37E-16  |
| 0.00000015 | 15 | ANGPTL3, APOA1, APOB, APOE, CAPN3, CETP, CYP26A1, GCKR, IRS1, JMJD1C, LIPC, LPL, MAP3K1, MLXIPL, PINX1                                                                | 5.75E-09  |
| 0.000216   | 15 | APOA1, APOB, APOE, FADS1, FADS2, FADS3, GALNT2, JMJD1C, LIPC, LPL, MLXIPL, PINX1, PLA2G6, PLTP, ZNF664                                                                | 0.000382  |
| 0.000154   | 15 | APOA1, APOB, APOE, FADS1, FADS2, FADS3, GALNT2, JMJD1C, LIPC, LPL, MLXIPL, PINX1, PLA2G6, PLTP, ZNF664                                                                | 0.000752  |
| 0.000112   | 15 | APOA1, APOB, APOE, FADS1, FADS2, FADS3, GALNT2, JMJD1C, LIPC, LPL, MLXIPL, PINX1, PLA2G6, PLTP, ZNF664                                                                | -         |
| 0.000112   | 15 | APOA1, APOB, APOE, FADS1, FADS2, FADS3, GALNT2, JMJD1C, LIPC, LPL, MLXIPL, PINX1, PLA2G6, PLTP, ZNF664                                                                | -         |

|            |    |                                                                                                  |            |
|------------|----|--------------------------------------------------------------------------------------------------|------------|
| 0.00000665 | 14 | ANGPTL3, APOB, APOE, CAPN3, CYP26A1, FADS1, GCKR, IRS1, LPL, MAP3K1, MLXIPL, NAT2, PLA2G6, TRIB1 | 4.26E-07   |
| 0.000535   | 13 | ANGPTL3, APOA1, APOB, APOE, CAPN3, CTF1, GCKR, IRS1, LPL, LRP1, MAP3K1, MLXIPL, TRIB1            | 0.000309   |
| 2.56E-08   | 12 | ANGPTL3, APOA1, APOB, APOE, CAPN3, CETP, GCKR, IRS1, LIPC, LPL, MLXIPL, PINX1                    | 6.36E-14   |
| 5.79E-08   | 12 | ANGPTL3, APOA1, APOB, APOE, CAPN3, CETP, GCKR, IRS1, LPL, LRP1, MAP3K1, TRIB1                    | 2.53E-09   |
| 1E-09      | 12 | ANGPTL3, *APOA1, APOB, APOE, CETP, CYP26A1, *FADS1, FADS2, FADS3, LIPC, LPL, PLA2G6              | 1.1E-10    |
| 0.0000154  | 11 | ANGPTL3, APOA1, APOB, APOE, CAPN3, CETP, GCKR, IRS1, LIPC, LRP1, PLTP                            | 8.48E-09   |
| 8.04E-08   | 10 | ANGPTL3, APOA1, APOB, APOE, CETP, GCKR, IRS1, LIPC, LPL, MLXIPL                                  | 3.04E-17   |
| 0.00018    | 10 | ANGPTL3, APOB, APOE, CYP26A1, FADS1, GCKR, IRS1, MAP3K1, MLXIPL, TRIB1                           | 0.0000236  |
| 1.37E-15   | 9  | *ANGPTL3, APOA1, APOB, APOE, *CETP, GCKR, LIPC, LPL, MLXIPL                                      | 5.62E-34   |
| 0.000989   | 9  | ANGPTL3, APOA1, APOE, CAPN3, GCKR, IRS1, MAP3K1, MLXIPL, TRIB1                                   | 0.00000581 |
| 0.000266   | 9  | ANGPTL3, APOA1, APOE, CAPN3, GCKR, IRS1, LRP1, PINX1, TRIB1                                      | 0.0000758  |
| 0.0000435  | 9  | ANGPTL3, APOA1, APOE, *CAPN3, GCKR, IRS1, LRP1, PINX1, TRIB1                                     | 0.000168   |

|            |   |                                                                  |           |
|------------|---|------------------------------------------------------------------|-----------|
| 0.000208   | 9 | ANGPTL3, APOB, APOE, CYP26A1, IRS1, LIPC, LPL,<br>MAP3K1, PLA2G6 | 0.000945  |
| 0.00000529 | 9 | APOA1, APOB, APOE, CAPN3, CETP, IRS1, LIPC, LPL,<br>MAP3K1       | 0.000459  |
| 0.000397   | 9 | ANGPTL3, APOB, APOE, CYP26A1, IRS1, LIPC, LPL,<br>MAP3K1, PLA2G6 | -         |
| 2.05E-09   | 8 | ANGPTL3, APOA1, APOB, APOE, CETP, LIPC, LRP1,<br>PLA2G6          | 9.33E-16  |
| 1.24E-08   | 8 | ANGPTL3, APOA1, APOB, APOE, CETP, LIPC, LRP1,<br>PLA2G6          | 2.22E-14  |
| 0.000128   | 8 | ANGPTL3, CYP26A1, FADS1, FADS2, FADS3, GCKR,<br>LIPC, LPL        | 0.0000105 |
| 4.33E-10   | 8 | ANGPTL3, APOB, APOE, CYP26A1, *IRS1, LIPC, LPL,<br>*PLA2G6       | 0.0000114 |
| 0.000799   | 8 | APOB, APOE, CAPN3, CYP26A1, IRS1, MAP3K1,<br>MLXIPL, NAT2        | -         |
| 6.71E-09   | 7 | ANGPTL3, APOA1, APOB, APOE, CETP, LIPC, PLTP                     | 4.2E-21   |
| 3.08E-11   | 7 | *ANGPTL3, *APOA1, *APOB, *APOE, *CETP, *LIPC,<br>*LRP1           | 1.8E-22   |
| 6.83E-11   | 7 | ANGPTL3, APOA1, APOB, APOE, CETP, LIPC, LRP1                     | 9.3E-22   |
| 2.14E-08   | 7 | ANGPTL3, APOA1, APOB, APOE, CETP, LIPC, LRP1                     | 1.17E-16  |
| 0.000227   | 7 | APOA1, APOE, CAPN3, CETP, GCKR, IRS1, LRP1                       | 1.53E-07  |
| 0.000486   | 7 | ANGPTL3, APOA1, CETP, FADS1, LIPC, LPL, PLA2G6                   | 0.0000262 |
| 0.000771   | 7 | ANGPTL3, CYP26A1, FADS1, FADS2, FADS3, LIPC,<br>LPL              | 0.000053  |
| 0.00000876 | 7 | APOA1, FADS1, FADS2, FADS3, LIPC, LPL, PLA2G6                    | 5.53E-07  |

|            |   |                                                         |            |
|------------|---|---------------------------------------------------------|------------|
| 0.00000328 | 7 | APOA1, FADS1, FADS2, FADS3, LIPC, LPL, PLTP             | 0.00000152 |
| 0.00000405 | 7 | APOA1, FADS1, FADS2, FADS3, LIPC, LPL, PLTP             | 0.00000198 |
| 0.000463   | 7 | ANGPTL3, CYP26A1, FADS1, FADS2, FADS3, LIPC,<br>LPL     | 0.000653   |
| 0.0000018  | 7 | ANGPTL3, CYP26A1, FADS1, FADS2, FADS3, LIPC,<br>LPL     | 0.00000756 |
| 5.96E-07   | 7 | *ANGPTL3, APOA1, CETP, FADS1, LIPC, *LPL,<br>*PLA2G6    | 0.00000224 |
| 2.22E-07   | 7 | APOA1, APOB, APOE, CETP, LIPC, LPL, PLA2G6              | 0.00000937 |
| 1.02E-15   | 7 | *ANGPTL3, *APOA1, *CETP, *GCKR, *LIPC, *LPL,<br>*MLXIPL | 1.07E-11   |
| 1.31E-15   | 7 | *ANGPTL3, APOA1, CETP, GCKR, LIPC, LPL, MLXIPL          | 1.31E-11   |
| 1.69E-10   | 6 | ANGPTL3, APOA1, APOB, APOE, CETP, LIPC                  | 7.84E-30   |
| 1.69E-10   | 6 | *ANGPTL3, *APOA1, *APOB, *APOE, *CETP, *LIPC            | 7.84E-30   |
| 1.28E-07   | 6 | APOA1, APOB, APOE, *CETP, LIPC, *PLTP                   | 5.25E-20   |
| 0.000105   | 6 | ANGPTL3, APOA1, APOE, GCKR, PINX1, TRIB1                | 5.82E-08   |
| 0.000023   | 6 | ANGPTL3, APOA1, APOE, GCKR, PINX1, TRIB1                | 4.87E-08   |
| 1.5E-08    | 6 | *APOA1, *APOB, *APOE, *CETP, *LPL, *LRP1                | 1.03E-11   |
| 2.79E-07   | 6 | ANGPTL3, APOA1, APOB, APOE, IRS1, MLXIPL                | 8.35E-10   |
| 2.45E-11   | 6 | APOA1, APOB, APOE, CETP, LIPC, LPL                      | 5.92E-16   |
| 0.00000342 | 6 | *ANGPTL3, FADS1, FADS2, FADS3, LIPC, LPL                | 0.00000699 |
| 5.52E-13   | 6 | APOA1, APOB, APOE, CETP, LIPC, LPL                      | 8.98E-14   |

|            |   |                                           |            |
|------------|---|-------------------------------------------|------------|
| 5.52E-13   | 6 | APOA1, APOB, APOE, CETP, LIPC, LPL        | 8.98E-14   |
| 1.48E-13   | 6 | APOA1, APOB, APOE, CETP, LIPC, LPL        | 4.31E-12   |
| 1.48E-13   | 6 | APOA1, APOB, APOE, CETP, LIPC, LPL        | 4.31E-12   |
| 1.48E-13   | 6 | APOA1, APOB, APOE, CETP, LIPC, LPL        | 4.31E-12   |
| 0.000143   | 6 | APOA1, APOE, GCKR, IRS1, PINX1, TRIB1     | -          |
| 0.000719   | 6 | APOA1, APOE, GCKR, IRS1, MLXIPL, TRIB1    | -          |
| 0.0000151  | 6 | ANGPTL3, APOE, IRS1, LRP1, *MAP3K1, TRIB1 | -          |
| 0.0000192  | 6 | ANGPTL3, APOE, IRS1, LRP1, MAP3K1, TRIB1  | -          |
| 0.00074    | 6 | APOA1, APOE, CYP26A1, IRS1, LRP1, TRIB1   | -          |
| 0.0000288  | 6 | ANGPTL3, APOE, IRS1, LRP1, MAP3K1, TRIB1  | -          |
| 0.0000296  | 6 | ANGPTL3, APOE, IRS1, LRP1, MAP3K1, TRIB1  | -          |
| 2.77E-09   | 5 | *APOA1, *APOB, APOE, *CETP, LIPC          | 3.65E-25   |
| 2.77E-09   | 5 | APOA1, APOB, APOE, CETP, LIPC             | 3.65E-25   |
| 1.83E-08   | 5 | APOA1, APOB, APOE, CETP, LIPC             | 7.03E-23   |
| 1.25E-07   | 5 | ANGPTL3, APOA1, APOE, IRS1, MLXIPL        | 1.33E-09   |
| 0.000633   | 5 | ANGPTL3, APOE, IRS1, MLXIPL, TRIB1        | 0.00018    |
| 0.000492   | 5 | APOA1, FADS1, FADS2, FADS3, MLXIPL        | 0.000907   |
| 8.54E-08   | 5 | APOB, APOE, CETP, LIPC, LPL               | 3.48E-08   |
| 9.32E-08   | 5 | APOB, APOE, CETP, LIPC, LPL               | 3.87E-08   |
| 6.21E-08   | 5 | APOB, *APOE, *CETP, LIPC, *LPL            | 2.38E-08   |
| 0.00000582 | 5 | FADS1, FADS2, FADS3, LIPC, LPL            | 0.00000524 |
| 0.0000981  | 5 | FADS1, FADS2, FADS3, LIPC, LPL            | 0.000143   |
| 0.0000981  | 5 | FADS1, FADS2, FADS3, LIPC, LPL            | 0.000143   |
| 0.00000129 | 5 | FADS1, FADS2, FADS3, *LIPC, *LPL          | 0.0000186  |
| 9.48E-07   | 5 | ANGPTL3, APOE, IRS1, MLXIPL, TRIB1        | 0.000251   |
| 9.23E-07   | 5 | ANGPTL3, APOB, CYP26A1, LIPC, LPL         | 0.000246   |
| 0.000625   | 4 | APOB, APOE, CETP, LRP1                    | 1.94E-08   |
| 0.00000662 | 4 | *APOB, *APOE, *CETP, *LRP1                | 1.49E-09   |

|            |   |                              |            |
|------------|---|------------------------------|------------|
| 0.0000938  | 4 | *APOB, FADS1, GCKR, MLXIPL   | 0.00000016 |
| 2.62E-08   | 4 | APOA1, APOE, CETP, *LRP1     | 7.08E-14   |
| 2.62E-08   | 4 | APOA1, APOE, CETP, LRP1      | 7.08E-14   |
| 8.14E-07   | 4 | APOA1, APOE, CETP, LRP1      | 3.59E-11   |
| 2.85E-09   | 4 | *APOA1, *APOE, *CETP, *LIPC  | 1.08E-15   |
| 5.35E-08   | 4 | APOA1, APOB, APOE, LIPC      | 3.96E-11   |
| 1E-09      | 4 | *APOA1, *APOE, *CETP, *LIPC  | 2.98E-11   |
| 0.0000699  | 4 | APOE, GCKR, PINX1, TRIB1     | 0.000553   |
| 5.27E-10   | 4 | *APOB, *APOE, *CETP, *LIPC   | 4.68E-09   |
| 3.25E-07   | 4 | *ANGPTL3, *APOB, *APOE, LRP1 | 0.00013    |
| 6.89E-07   | 4 | ANGPTL3, APOB, APOE, LRP1    | 0.000225   |
| 2.59E-11   | 4 | *APOE, *CETP, *LIPC, *LPL    | 1.48E-07   |
| 1.55E-10   | 4 | APOE, CETP, LIPC, LPL        | 5.07E-07   |
| 4.82E-07   | 4 | APOA1, *CETP, LIPC, PLA2G6   | 0.000173   |
| 0.00000213 | 4 | APOA1, CETP, LIPC, PLA2G6    | 0.000513   |
| 0.000619   | 4 | APOE, CAPN3, MLXIPL, TRIB1   | -          |
| 0.000423   | 4 | APOA1, CETP, LIPC, PLA2G6    | -          |
| 0.00000822 | 4 | APOE, IRS1, MLXIPL, TRIB1    | -          |
| 0.0000163  | 4 | APOA1, CETP, LIPC, PLA2G6    | -          |
| 0.0000163  | 4 | APOA1, CETP, LIPC, PLA2G6    | -          |
| 0.0000412  | 4 | APOA1, CETP, LIPC, PLA2G6    | -          |
| 7.07E-08   | 3 | *ANGPTL3, *APOA1, *CETP      | 7.79E-09   |
| 0.00000878 | 3 | APOA1, APOE, *CETP           | 6.43E-11   |
| 0.0000371  | 3 | APOA1, APOE, CETP            | 1.26E-09   |
| 0.000297   | 3 | APOB, APOE, MLXIPL           | 8.74E-08   |
| 0.000124   | 3 | APOA1, APOB, APOE            | 0.00000064 |
| 0.000161   | 3 | *APOA1, *APOB, *APOE         | 0.0000312  |
| 3.81E-07   | 3 | APOA1, APOB, APOE            | 8.91E-09   |
| 3.81E-07   | 3 | APOA1, APOB, APOE            | 8.91E-09   |
| 0.000423   | 3 | GCKR, IRS1, MLXIPL           | 0.000112   |
| 0.000423   | 3 | GCKR, *IRS1, *MLXIPL         | 0.000112   |
| 0.0000405  | 3 | *FADS1, *FADS2, *FADS3       | 0.000198   |
| 0.00017    | 3 | *FADS1, *FADS2, FADS3        | 0.000811   |
| 5.69E-07   | 3 | APOE, *CETP, LRP1            | 0.00000285 |

|            |   |                        |            |
|------------|---|------------------------|------------|
| 0.00000945 | 3 | APOB, CETP, LPL        | 0.0000467  |
| 0.00000148 | 3 | *APOB, *LIPC, *LPL     | 0.000664   |
| 0.00000216 | 3 | APOB, LIPC, LPL        | 0.00085    |
| 0.00000216 | 3 | APOB, LIPC, LPL        | 0.00085    |
| 0.000144   | 3 | GCKR, IRS1, MLXIPL     | -          |
| 0.000259   | 3 | GCKR, IRS1, MLXIPL     | -          |
| 0.000291   | 3 | GCKR, IRS1, MLXIPL     | -          |
| 0.000558   | 3 | APOE, LRP1, TRIB1      | -          |
| 0.000578   | 3 | APOE, LRP1, TRIB1      | -          |
| 0.00000411 | 3 | APOB, LIPC, LPL        | -          |
| 0.00064    | 3 | APOE, LRP1, TRIB1      | -          |
| 0.000866   | 3 | APOE, LRP1, TRIB1      | -          |
| 0.000866   | 3 | *FADS1, *FADS2, *FADS3 | -          |
| 0.000079   | 3 | APOE, *CAPN3, TRIB1    | -          |
| 0.00064    | 3 | APOE, LRP1, TRIB1      | -          |
| 0.000866   | 3 | APOE, LRP1, TRIB1      | -          |
| 0.000297   | 2 | *APOA1, *APOE          | 6.44E-10   |
| 0.0000507  | 2 | *APOB, *APOE           | 6.96E-07   |
| 0.000345   | 2 | APOA1, APOE            | 0.0000135  |
| 0.00048    | 2 | APOB, APOE             | 0.0000224  |
| 0.0000139  | 2 | *APOA1, *APOE          | 8.49E-08   |
| 0.0000607  | 2 | *APOA1, *APOE          | 9.27E-07   |
| 0.000192   | 2 | *APOA1, *APOE          | 0.00000555 |
| 0.0000718  | 2 | APOE, LRP1             | 0.0000012  |
| 0.0000718  | 2 | APOE, LRP1             | 0.0000012  |
| 0.000604   | 2 | APOE, *LRP1            | 0.0000318  |
| 0.000571   | 2 | *ANGPTL3, LIPC         | 0.0000293  |
| 0.0000194  | 2 | *APOA1, *APOE          | 0.000056   |
| 0.0000194  | 2 | *APOA1, *APOE          | 0.000056   |
| 0.0000332  | 2 | APOA1, APOE            | 0.0000959  |
| 0.000211   | 2 | *APOB, APOE            | 0.000607   |
| 0.0000258  | 2 | *FADS1, *FADS2         | 0.0000746  |
| 0.0000507  | 2 | *FADS1, *FADS2         | 0.000146   |
| 0.0000332  | 2 | *APOE, *LIPC           | 0.0000959  |
| 0.0000332  | 2 | APOE, LIPC             | 0.0000959  |
| 0.0000507  | 2 | *APOE, *LRP1           | 0.000146   |
| 0.000274   | 2 | APOB, LPL              | 0.000785   |
| 0.000451   | 2 | *ANGPTL3, *APOA1       | -          |
| 0.000451   | 2 | *IRS1, MLXIPL          | -          |
| 0.000571   | 2 | IRS1, MLXIPL           | -          |

|           |   |                |            |
|-----------|---|----------------|------------|
| 0.000778  | 2 | IRS1, MLXIPL   | -          |
| 0.000637  | 2 | *APOB, *PLTP   | -          |
| 0.0000415 | 2 | *LRP1, *TRIB1  | -          |
| 0.0000718 | 2 | *APOB, *LRP1   | -          |
| 0.000297  | 2 | *ANGPTL3, IRS1 | -          |
| 0.000157  | 2 | *APOB, *LPL    | -          |
| 0.00032   | 2 | *APOB, LPL     | -          |
| 0.00037   | 2 | *APOB, *LPL    | -          |
| 0.00054   | 2 | LRP1, TRIB1    | -          |
| 0.000345  | 2 | CYP26A1, PLTP  | -          |
| -         | - | -              | 0.00000916 |
| -         | - | -              | 0.0000101  |
| -         | - | -              | 0.0000131  |
| -         | - | -              | 0.0000244  |
| -         | - | -              | 0.0000241  |
| -         | - | -              | 0.000434   |



|   |   |   |            |
|---|---|---|------------|
| - | - | - | 0.00000196 |
| - | - | - | 0.00000283 |
| - | - | - | 0.000866   |
| - | - | - | 0.0000519  |
| - | - | - | 3.71E-09   |
| - | - | - | 0.00062    |
| - | - | - | 0.0000206  |
| - | - | - | 0.0000575  |
| - | - | - | 0.000118   |
| - | - | - | 0.0000496  |
| - | - | - | 0.000949   |
| - | - | - | 0.000007   |

|   |   |   |            |
|---|---|---|------------|
| - | - | - | 0.000313   |
| - | - | - | 0.000263   |
| - | - | - | 0.000279   |
| - | - | - | 0.000998   |
| - | - | - | 0.000575   |
| - | - | - | 0.0000122  |
| - | - | - | 0.0000222  |
| - | - | - | 0.00093    |
| - | - | - | 0.000168   |
| - | - | - | 0.000479   |
| - | - | - | 0.00054    |
| - | - | - | 0.00045    |
| - | - | - | 0.00000481 |
| - | - | - | 0.0000879  |
| - | - | - | 0.00000995 |
| - | - | - | 0.0000182  |
| - | - | - | 0.000272   |
| - | - | - | 0.000442   |
| - | - | - | 0.000413   |
| - | - | - | 4.61E-10   |
| - | - | - | 6.54E-09   |
| - | - | - | 1.32E-07   |
| - | - | - | 0.00000144 |
| - | - | - | 0.0000457  |
| - | - | - | 0.000746   |
| - | - | - | 0.000151   |
| - | - | - | 4.25E-08   |
| - | - | - | 8.49E-08   |
| - | - | - | 8.49E-08   |
| - | - | - | 0.00000191 |

|   |   |   |            |
|---|---|---|------------|
| - | - | - | 0.0000168  |
| - | - | - | 0.0000434  |
| - | - | - | 0.0000889  |
| - | - | - | 0.000244   |
| - | - | - | 0.00067    |
| - | - | - | 0.000923   |
| - | - | - | 0.0000012  |
| - | - | - | 0.000244   |
| - | - | - | 0.000254   |
| - | - | - | 0.000254   |
| - | - | - | 0.000264   |
| - | - | - | 0.000286   |
| - | - | - | 0.000286   |
| - | - | - | 0.000749   |
| - | - | - | 0.000769   |
| - | - | - | 0.000769   |
| - | - | - | 0.00097    |
| - | - | - | 0.000105   |
| - | - | - | 0.000189   |
| - | - | - | 0.000189   |
| - | - | - | 0.000198   |
| - | - | - | 0.000216   |
| - | - | - | 0.000275   |
| - | - | - | 0.000633   |
| - | - | - | 0.00000268 |
| - | - | - | 0.00000268 |
| - | - | - | 0.00000804 |
| - | - | - | 0.00000804 |
| - | - | - | 0.00000804 |
| - | - | - | 0.0000161  |
| - | - | - | 0.0000161  |
| - | - | - | 0.0000401  |
| - | - | - | 0.000056   |
| - | - | - | 0.000056   |
| - | - | - | 0.000146   |
| - | - | - | 0.000146   |
| - | - | - | 0.000146   |
| - | - | - | 0.000207   |
| - | - | - | 0.000207   |



|   |   |   |   |
|---|---|---|---|
| - | - | - | - |
| - | - | - | - |
| - | - | - | - |
| - | - | - | - |
| - | - | - | - |
| - | - | - | - |
| - | - | - | - |
| - | - | - | - |
| - | - | - | - |
| - | - | - | - |
| - | - | - | - |
| - | - | - | - |
| - | - | - | - |
| - | - | - | - |
| - | - | - | - |
| - | - | - | - |
| - | - | - | - |

- - - -

- - - -

- - - -

- - - -

- - - -

- - - -

- - - -



---



---

## TC

---

| k  | genes                                                                                                                                                                                                                                                                                                                                                                               | p         | k  |
|----|-------------------------------------------------------------------------------------------------------------------------------------------------------------------------------------------------------------------------------------------------------------------------------------------------------------------------------------------------------------------------------------|-----------|----|
| 49 | ABCA1, ABCG5, ABCG8, ABO, ANGPTL3,<br>APOA1, APOB, APOE, BRAP, *C6orf106, CETP,<br>CYP7A1, DNAH11, ERGIC3, EVI5, FADS1,<br>FADS2, FADS3, FRK, GCKR, GPAM, HFE,<br>HMGCR, HNF1A, HNF4A, IRF2BP2, LDLR,<br>LDLRAP1, LIPC, LIPG, LPA, MAFB, MAMSTR,<br>MARC1, MYLIP, NAT2, NPC1L1, OSBPL7,<br>PCSK9, PLEC, PPP1R3B, RAB3GAP1, RAF1,<br>SORT1, *SPTY2D1, ST3GAL4, TOP1, TRIB1,<br>TRPS1 | 1         | 38 |
| 37 | ABCA1, ABCG5, ABCG8, ABO, ANGPTL3,<br>APOA1, APOB, APOE, CETP, CYP7A1, FADS1,<br>FADS2, FADS3, FRK, GCKR, GPAM, HFE,<br>HMGCR, HNF1A, HNF4A, IRF2BP2, LDLR,<br>LDLRAP1, LIPC, LIPG, LPA, MAFB, MARC1,<br>MYLIP, NAT2, NPC1L1, PCSK9, PPP1R3B, RAF1,<br>ST3GAL4, TOP1, TRPS1                                                                                                         | 0.0000586 | 31 |
| 36 | ABCA1, ABCG5, ABCG8, ABO, ANGPTL3,<br>APOA1, APOB, APOE, CETP, CYP7A1, FADS1,<br>FADS2, FADS3, FRK, GCKR, GPAM, HMGCR,<br>HNF1A, HNF4A, IRF2BP2, LDLR, LDLRAP1,<br>LIPC, LIPG, LPA, MAFB, MARC1, MYLIP, NAT2,<br>NPC1L1, PCSK9, PPP1R3B, RAF1, ST3GAL4,<br>TOP1, TRPS1                                                                                                              | 0.000147  | 30 |
| 34 | ABCA1, ABCG5, ABCG8, ABO, ANGPTL3,<br>APOA1, APOB, APOE, CETP, CYP7A1, FADS1,<br>FADS2, FADS3, FRK, GCKR, GPAM, HMGCR,<br>HNF1A, HNF4A, IRF2BP2, LDLR, LDLRAP1,<br>LIPC, LIPG, LPA, MAFB, MYLIP, NPC1L1, PCSK9,<br>PPP1R3B, RAF1, ST3GAL4, TOP1, TRPS1                                                                                                                              | 0.000149  | 29 |
| -  | -                                                                                                                                                                                                                                                                                                                                                                                   | 0.00034   | 29 |

---

|    |                                                                                                                                                                                                                                                      |            |    |
|----|------------------------------------------------------------------------------------------------------------------------------------------------------------------------------------------------------------------------------------------------------|------------|----|
| 36 | ABCA1, ABCG5, ABCG8, ABO, ANGPTL3, APOA1, APOB, APOE, CETP, CYP7A1, FADS1, FADS2, FADS3, FRK, GCKR, GPAM, HMGCR, HNF1A, HNF4A, IRF2BP2, LDLR, LDLRAP1, LIPC, LIPG, LPA, MAFB, MARC1, MYLIP, NAT2, NPC1L1, PCSK9, PPP1R3B, RAF1, ST3GAL4, TOP1, TRPS1 | 0.00000475 | 30 |
| 26 | *ABCA1, *ABCG5, *ABCG8, ANGPTL3, *APOA1, *APOB, *APOE, *CETP, *CYP7A1, *FADS1, *FADS2, FADS3, *GCKR, *GPAM, *HMGCR, HNF1A, HNF4A, *LDLR, LDLRAP1, LIPC, *LPA, MARC1, *NAT2, *NPC1L1, PCSK9, *ST3GAL4                                                 | 9.53E-12   | 22 |
| 23 | *ABCA1, *ABCG5, *ABCG8, ANGPTL3, *APOA1, *APOB, *APOE, *CETP, CYP7A1, FADS1, FADS2, FADS3, GPAM, HMGCR, HNF1A, *HNF4A, *LDLR, LDLRAP1, LIPC, *LIPG, *LPA, *NPC1L1, PCSK9                                                                             | 5.63E-14   | 19 |
| 22 | ABCA1, ABCG5, ABCG8, ANGPTL3, APOA1, APOB, APOE, CETP, CYP7A1, GCKR, GPAM, HFE, HNF1A, HNF4A, LDLR, LDLRAP1, LIPC, LIPG, MYLIP, NPC1L1, PCSK9, RAF1                                                                                                  | 3.31E-07   | 17 |
| 21 | ABCA1, ABO, APOA1, APOB, APOE, CYP7A1, FADS1, FADS2, FADS3, GPAM, HFE, HMGCR, HNF1A, HNF4A, IRF2BP2, LIPC, MAFB, NPC1L1, ST3GAL4, TOP1, TRPS1                                                                                                        | 0.000746   | 17 |
| 20 | ABCA1, ABO, APOA1, APOB, APOE, CYP7A1, FADS1, FADS2, FADS3, GPAM, HMGCR, HNF1A, HNF4A, IRF2BP2, LIPC, MAFB, NPC1L1, ST3GAL4, TOP1, TRPS1                                                                                                             | -          | -  |
| -  | -                                                                                                                                                                                                                                                    | -          | -  |
| -  | -                                                                                                                                                                                                                                                    | -          | -  |



|    |                                                                                                                                               |            |    |
|----|-----------------------------------------------------------------------------------------------------------------------------------------------|------------|----|
| 21 | ABCA1, ABCG5, ANGPTL3, APOB, APOE, CYP7A1, FADS1, GCKR, GPAM, HMGCR, HNF1A, HNF4A, LDLR, LIPG, MARC1, NAT2, PCSK9, RAF1, SORT1, TOP1, TRIB1   | 0.0000132  | 16 |
| 19 | ABCA1, ANGPTL3, APOA1, APOB, APOE, GCKR, GPAM, HMGCR, HNF1A, HNF4A, LDLR, LDLRAP1, LIPG, MAFB, MAMSTR, MYLIP, PCSK9, RAF1, TRIB1              | -          | -  |
| 21 | ABCA1, ABCG5, ABCG8, ANGPTL3, APOA1, APOB, APOE, CETP, CYP7A1, GCKR, GPAM, HFE, HNF1A, HNF4A, LDLR, LDLRAP1, LIPC, LIPG, MYLIP, NPC1L1, PCSK9 | 6.7E-12    | 17 |
| 17 | ABCA1, ABCG5, ABCG8, ANGPTL3, APOA1, APOB, APOE, CETP, GCKR, GPAM, HNF1A, HNF4A, LDLRAP1, LIPG, PCSK9, RAF1, TRIB1                            | 2.67E-08   | 14 |
| 16 | *ABCA1, ANGPTL3, *APOA1, APOB, APOE, CETP, *CYP7A1, *FADS1, FADS2, FADS3, *GPAM, *HMGCR, HNF1A, LIPC, LIPG, PCSK9                             | 3.23E-09   | 13 |
| 19 | ABCA1, ABCG5, ABCG8, ANGPTL3, APOA1, APOB, APOE, CETP, GCKR, GPAM, HNF1A, LDLR, LDLRAP1, LIPC, LIPG, LPA, NPC1L1, OSBPL7, TRPS1               | 0.00000161 | 14 |
| 21 | ABCA1, ABCG5, ABCG8, ANGPTL3, APOA1, APOB, APOE, CETP, CYP7A1, GCKR, GPAM, HFE, HNF1A, HNF4A, LDLR, LDLRAP1, LIPC, LIPG, MYLIP, NPC1L1, PCSK9 | 1.34E-14   | 17 |
| 15 | ABCA1, ANGPTL3, APOB, APOE, CYP7A1, FADS1, GCKR, GPAM, HNF1A, HNF4A, LDLR, PCSK9, RAF1, SORT1, TRIB1                                          | 0.000109   | 12 |
| 19 | ABCA1, ABCG5, ABCG8, *ANGPTL3, APOA1, APOB, APOE, *CETP, CYP7A1, GCKR, GPAM, *HNF4A, LDLR, LDLRAP1, LIPC, LIPG, MYLIP, NPC1L1, PCSK9          | 6.99E-25   | 14 |
| 16 | ABCA1, ANGPTL3, APOA1, APOE, GCKR, GPAM, HNF1A, HNF4A, LDLR, LDLRAP1, MAFB, MAMSTR, MYLIP, PCSK9, RAF1, TRIB1                                 | 0.000122   | 12 |
| 13 | ANGPTL3, APOA1, APOE, GCKR, HMGCR, HNF4A, LDLRAP1, LPA, PCSK9, RAB3GAP1, RAF1, SORT1, TRIB1                                                   | 0.000114   | 11 |
| 11 | ANGPTL3, APOA1, APOE, GCKR, HMGCR, LPA, PCSK9, RAB3GAP1, RAF1, SORT1, TRIB1                                                                   | 0.0000794  | 10 |

|    |                                                                                                              |           |    |
|----|--------------------------------------------------------------------------------------------------------------|-----------|----|
| 11 | ABCG5, ABCG8, ANGPTL3, APOB, APOE, CYP7A1, LDLR, LIPC, LIPG, MYLIP, PCSK9                                    | -         | -  |
| 9  | ABCA1, APOA1, APOB, APOE, CETP, HFE, HMGCR, LIPC, LIPG                                                       | -         | -  |
| -  | -                                                                                                            | -         | -  |
| 14 | ABCA1, ANGPTL3, APOA1, APOB, APOE, CETP, CYP7A1, HMGCR, HNF1A, LDLR, LDLRAP1, LIPC, NPC1L1, PCSK9            | 2.78E-14  | 12 |
| 14 | ABCA1, ANGPTL3, APOA1, APOB, APOE, CETP, CYP7A1, HMGCR, HNF1A, LDLR, LDLRAP1, LIPC, NPC1L1, PCSK9            | 4.25E-13  | 12 |
| 12 | ANGPTL3, CYP7A1, FADS1, FADS2, FADS3, GCKR, GPAM, HNF1A, HNF4A, LIPC, MARC1, ST3GAL4                         | 0.000177  | 9  |
| 6  | ANGPTL3, APOB, APOE, CYP7A1, LIPC, LIPG                                                                      | 0.000633  | 4  |
| -  | -                                                                                                            | -         | -  |
| 16 | ABCA1, ABCG5, ABCG8, ANGPTL3, APOA1, APOB, APOE, CETP, HNF1A, LDLR, LDLRAP1, LIPC, LIPG, LPA, NPC1L1, OSBPL7 | 1.1E-17   | 13 |
| 14 | *ABCA1, *ANGPTL3, *APOA1, *APOB, *APOE, *CETP, CYP7A1, HMGCR, *HNF1A, *LDLR, *LDLRAP1, *LIPC, NPC1L1, *PCSK9 | 5.07E-20  | 12 |
| 14 | ABCA1, ANGPTL3, APOA1, APOB, APOE, CETP, CYP7A1, HMGCR, HNF1A, LDLR, LDLRAP1, LIPC, NPC1L1, PCSK9            | 2.05E-09  | 12 |
| 14 | ABCA1, ANGPTL3, APOA1, APOB, APOE, CETP, CYP7A1, HMGCR, HNF1A, LDLR, LDLRAP1, LIPC, NPC1L1, PCSK9            | 4.68E-15  | 12 |
| 13 | ABCA1, ABCG5, ABCG8, APOA1, APOE, CETP, GCKR, GPAM, HNF1A, HNF4A, LDLRAP1, LIPG, PCSK9                       | 5.28E-07  | 11 |
| 11 | ABCG5, ABCG8, ANGPTL3, APOA1, CETP, FADS1, GPAM, HMGCR, LIPC, LIPG, PCSK9                                    | 0.0000906 | 9  |
| 11 | ANGPTL3, CYP7A1, FADS1, FADS2, FADS3, GPAM, HNF1A, HNF4A, LIPC, MARC1, ST3GAL4                               | 0.000163  | 9  |
| 10 | APOA1, CYP7A1, FADS1, FADS2, FADS3, GPAM, HMGCR, HNF1A, LIPC, NPC1L1                                         | 5.33E-07  | 9  |

|    |                                                                                                                                         |            |    |
|----|-----------------------------------------------------------------------------------------------------------------------------------------|------------|----|
| 9  | APOA1, CYP7A1, FADS1, FADS2, FADS3,<br>HMGCR, HNF1A, LIPC, NPC1L1                                                                       | 0.00000197 | 8  |
| 9  | APOA1, CYP7A1, FADS1, FADS2, FADS3,<br>HMGCR, HNF1A, LIPC, NPC1L1                                                                       | 0.0000025  | 8  |
| 9  | ANGPTL3, CYP7A1, FADS1, FADS2, FADS3,<br>GPAM, HNF1A, HNF4A, LIPC                                                                       | -          | -  |
| 8  | ANGPTL3, CYP7A1, FADS1, FADS2, FADS3,<br>GPAM, HNF1A, LIPC                                                                              | 0.0000124  | 7  |
| 8  | *ANGPTL3, APOA1, CETP, FADS1, *GPAM,<br>LIPC, LIPG, *PCSK9                                                                              | 0.000052   | 6  |
| 7  | APOA1, APOB, APOE, CETP, GPAM, LIPC,<br>PCSK9                                                                                           | 0.0000229  | 6  |
| 6  | *ANGPTL3, *APOA1, *CETP, *GCKR, *HNF4A,<br>*LIPC                                                                                        | 0.00000855 | 3  |
| 6  | *ANGPTL3, APOA1, CETP, GCKR, HNF4A, LIPC                                                                                                | 0.00000942 | 3  |
| 16 | ABCA1, ABCG5, ABCG8, ANGPTL3, APOA1,<br>APOB, APOE, CETP, CYP7A1, LDLR, LDLRAP1,<br>LIPC, LIPG, MYLIP, NPC1L1, PCSK9                    | 1.06E-24   | 13 |
| 16 | *ABCA1, *ABCG5, *ABCG8, *ANGPTL3,<br>*APOA1, *APOB, *APOE, *CETP, *CYP7A1,<br>*LDLR, *LDLRAP1, *LIPC, *LIPG, *MYLIP,<br>*NPC1L1, *PCSK9 | 1.06E-24   | 13 |
| 15 | ABCA1, ABCG5, ABCG8, APOA1, APOB, APOE,<br>*CETP, HNF1A, LDLR, LDLRAP1, LIPC, LIPG,<br>*LPA, NPC1L1, *OSBPL7                            | 1.94E-16   | 12 |
| 11 | ANGPTL3, APOA1, APOE, GCKR, HMGCR,<br>HNF4A, LPA, PCSK9, RAF1, SORT1, TRIB1                                                             | 4.56E-08   | 10 |
| 10 | ANGPTL3, APOA1, APOE, GCKR, HMGCR, LPA,<br>*PCSK9, RAF1, SORT1, TRIB1                                                                   | 3.43E-09   | 10 |
| 9  | *ABCA1, *APOA1, *APOB, *APOE, *CETP,<br>*LDLR, *LPA, *NPC1L1, *PCSK9                                                                    | 4.64E-11   | 8  |
| 9  | ANGPTL3, APOA1, APOB, APOE, CYP7A1,<br>GPAM, *HNF4A, LDLR, LDLRAP1                                                                      | 2.34E-09   | 8  |
| 9  | ABCA1, APOA1, APOB, APOE, CETP, LDLR,<br>LDLRAP1, LIPC, LIPG                                                                            | 1.4E-10    | 6  |
| 7  | *ANGPTL3, FADS1, FADS2, FADS3, *GPAM,<br>HNF1A, LIPC                                                                                    | 0.0000178  | 6  |
| 7  | ABCA1, APOA1, APOB, APOE, CETP, LIPC, LIPG                                                                                              | 9.18E-08   | 4  |

|    |                                                                                             |           |    |
|----|---------------------------------------------------------------------------------------------|-----------|----|
| 7  | ABCA1, APOA1, APOB, APOE, CETP, LIPC, LIPG                                                  | 9.18E-08  | 4  |
| 6  | APOA1, APOB, APOE, CETP, LIPC, LIPG                                                         | 3.96E-08  | 4  |
| 6  | APOA1, APOB, APOE, CETP, LIPC, LIPG                                                         | 3.96E-08  | 4  |
| 6  | APOA1, APOB, APOE, CETP, LIPC, LIPG                                                         | 3.96E-08  | 4  |
| -  | -                                                                                           | 0.000667  | 6  |
| -  | -                                                                                           | -         | -  |
| -  | -                                                                                           | -         | -  |
| -  | -                                                                                           | -         | -  |
| -  | -                                                                                           | -         | -  |
| -  | -                                                                                           | -         | -  |
| -  | -                                                                                           | -         | -  |
| 13 | ABCA1, ABCG5, ABCG8, *APOA1, *APOB, APOE, *CETP, HNF1A, *LDLR, LDLRAP1, LIPC, LIPG, *NPC1L1 | 1.66E-09  | 10 |
| 13 | ABCA1, *ABCG5, *ABCG8, APOA1, APOB, APOE, CETP, HNF1A, LDLR, LDLRAP1, LIPC, LIPG, *NPC1L1   | 1.66E-09  | 10 |
| 13 | ABCA1, ABCG5, ABCG8, APOA1, APOB, APOE, CETP, HNF1A, LDLR, LDLRAP1, LIPC, LIPG, NPC1L1      | 8.59E-08  | 10 |
| 7  | ANGPTL3, APOA1, APOE, GPAM, HNF4A, LDLR, LDLRAP1                                            | 1.12E-08  | 6  |
| 7  | ANGPTL3, APOE, LDLR, MYLIP, PCSK9, RAB3GAP1, TRIB1                                          | 0.000299  | 6  |
| 6  | APOA1, FADS1, FADS2, FADS3, *MARC1, PPP1R3B                                                 | 0.0000235 | 7  |
| 6  | APOB, APOE, CETP, GPAM, LIPC, PCSK9                                                         | 3.51E-07  | 5  |
| 6  | APOB, APOE, CETP, GPAM, LIPC, PCSK9                                                         | 3.83E-07  | 5  |
| 6  | APOB, *APOE, *CETP, GPAM, LIPC, *PCSK9                                                      | 2.56E-07  | 5  |
| 6  | CYP7A1, FADS1, FADS2, FADS3, HNF1A, LIPC                                                    | 0.000023  | 5  |
| 6  | CYP7A1, FADS1, FADS2, FADS3, HNF1A, LIPC                                                    | 0.000368  | 5  |
| 6  | CYP7A1, FADS1, FADS2, FADS3, HNF1A, LIPC                                                    | 0.000368  | 5  |
| 5  | FADS1, FADS2, FADS3, *HNF1A, *LIPC                                                          | 0.000117  | 4  |
| 4  | ANGPTL3, APOE, MYLIP, TRIB1                                                                 | 0.0000922 | 4  |
| 4  | ANGPTL3, APOB, LIPC, LIPG                                                                   | -         | -  |
| 9  | ABCA1, APOB, APOE, CETP, HFE, *LDLR, LDLRAP1, LPA, *SORT1                                   | 3.9E-08   | 8  |
| 7  | *APOB, *APOE, *CETP, *HFE, *LDLR, *LDLRAP1, *LPA                                            | 2.28E-10  | 7  |

|   |                                                       |            |   |
|---|-------------------------------------------------------|------------|---|
| 7 | *APOB, CYP7A1, FADS1, GCKR, GPAM, HNF1A, HNF4A        | 6.83E-07   | 6 |
| 7 | ABCA1, ABCG5, ABCG8, APOA1, APOE, CETP, LIPG          | 5.2E-10    | 5 |
| 7 | ABCA1, ABCG5, ABCG8, APOA1, APOE, CETP, LIPG          | 5.2E-10    | 5 |
| 7 | ABCA1, ABCG5, ABCG8, APOA1, APOE, CETP, LIPG          | 0.00000004 | 5 |
| 7 | *ABCA1, *APOA1, *APOE, *CETP, *HNF1A, *LIPC, *LIPG    | 8.81E-09   | 4 |
| 6 | APOA1, APOB, APOE, LDLR, LDLRAP1, LIPC                | 1.29E-09   | 5 |
| 5 | *APOA1, *APOE, *CETP, *LIPC, *LIPG                    | 8.78E-07   | 3 |
| 4 | APOE, GCKR, HMGCR, TRIB1                              | 0.0000106  | 5 |
| 4 | *APOB, *APOE, *CETP, *LIPC                            | 5.53E-07   | 3 |
| 3 | *ANGPTL3, *APOB, *APOE                                | 0.0000603  | 3 |
| 3 | ANGPTL3, APOB, APOE                                   | 0.000105   | 3 |
| 3 | *APOE, *CETP, *LIPC                                   | 0.0000335  | 2 |
| 3 | APOE, CETP, LIPC                                      | 0.0000717  | 2 |
| 3 | APOA1, *CETP, LIPC                                    | -          | - |
| 3 | APOA1, CETP, LIPC                                     | -          | - |
| - | -                                                     | 0.00016    | 5 |
| - | -                                                     | -          | - |
| - | -                                                     | -          | - |
| - | -                                                     | -          | - |
| - | -                                                     | -          | - |
| - | -                                                     | -          | - |
| 7 | *ABCA1, *ANGPTL3, *APOA1, *CETP, *GPAM, *HNF4A, *LIPG | 2.89E-10   | 4 |
| 6 | ABCA1, *ABCG8, APOA1, APOE, *CETP, *LDLR              | 1.92E-09   | 5 |
| 6 | ABCA1, ABCG8, APOA1, APOE, CETP, LDLR                 | 2.23E-08   | 5 |
| 6 | APOB, APOE, CYP7A1, GPAM, HNF4A, LDLR                 | 7.55E-07   | 5 |
| 5 | APOA1, APOB, APOE, CYP7A1, LDLRAP1                    | 1.73E-07   | 5 |
| 4 | ABCA1, *APOA1, *APOB, *APOE                           | 0.000363   | 3 |
| 4 | ABCA1, APOA1, APOB, APOE                              | 8.78E-07   | 3 |
| 4 | ABCA1, APOA1, APOB, APOE                              | 8.78E-07   | 3 |
| 4 | CYP7A1, GCKR, HNF1A, HNF4A                            | -          | - |
| 4 | CYP7A1, GCKR, *HNF1A, *HNF4A                          | -          | - |
| 3 | *FADS1, *FADS2, *FADS3                                | 0.0000922  | 3 |
| 3 | *FADS1, *FADS2, FADS3                                 | 0.000383   | 3 |
| 3 | ABCA1, APOE, *CETP                                    | 0.000215   | 2 |

|   |                                       |            |   |
|---|---------------------------------------|------------|---|
| 3 | ABCA1, APOB, CETP                     | -          | - |
| 2 | *APOB, *LIPC                          | -          | - |
| 2 | APOB, LIPC                            | -          | - |
| 2 | APOB, LIPC                            | -          | - |
| - | -                                     | -          | - |
| - | -                                     | -          | - |
| - | -                                     | -          | - |
| - | -                                     | -          | - |
| - | -                                     | -          | - |
| - | -                                     | -          | - |
| - | -                                     | -          | - |
| - | -                                     | -          | - |
| - | -                                     | -          | - |
| - | -                                     | -          | - |
| - | -                                     | -          | - |
| - | -                                     | -          | - |
| 5 | *ABCA1, *ABCG5, *ABCG8, *APOA1, *APOE | 3.38E-08   | 4 |
| 3 | *APOB, *APOE, *LDLR                   | 3.19E-07   | 3 |
| 3 | APOA1, APOE, LDLRAP1                  | 0.00000625 | 3 |
| 3 | APOB, APOE, LDLRAP1                   | 0.0000104  | 3 |
| 3 | *ABCA1, *APOA1, *APOE                 | 0.000024   | 2 |
| 3 | *ABCA1, *APOA1, *APOE                 | 0.000105   | 2 |
| 3 | *ABCA1, *APOA1, *APOE                 | 0.000332   | 2 |
| 3 | ABCA1, APOE, *LIPG                    | -          | - |
| 3 | ABCA1, APOE, LIPG                     | -          | - |
| 3 | ABCA1, APOE, LIPG                     | -          | - |
| 3 | *ANGPTL3, LIPC, *LIPG                 | -          | - |
| 2 | *APOA1, *APOE                         | 0.0000335  | 2 |
| 2 | *APOA1, *APOE                         | 0.0000335  | 2 |
| 2 | APOA1, APOE                           | 0.0000574  | 2 |
| 2 | *APOB, APOE                           | 0.000364   | 2 |
| 2 | *FADS1, *FADS2                        | 0.0000447  | 2 |
| 2 | *FADS1, *FADS2                        | 0.0000876  | 2 |
| 2 | *APOE, *LIPC                          | -          | - |
| 2 | APOE, LIPC                            | -          | - |
| 2 | *ABCA1, *APOE                         | -          | - |
| 2 | ABCA1, APOB                           | -          | - |
| - | -                                     | 0.000776   | 2 |
| - | -                                     | -          | - |
| - | -                                     | -          | - |

|    |                                                                                                                                                                                             |           |    |
|----|---------------------------------------------------------------------------------------------------------------------------------------------------------------------------------------------|-----------|----|
| -  | -                                                                                                                                                                                           | -         | -  |
| -  | -                                                                                                                                                                                           | -         | -  |
| -  | -                                                                                                                                                                                           | -         | -  |
| -  | -                                                                                                                                                                                           | -         | -  |
| -  | -                                                                                                                                                                                           | -         | -  |
| -  | -                                                                                                                                                                                           | -         | -  |
| -  | -                                                                                                                                                                                           | -         | -  |
| -  | -                                                                                                                                                                                           | -         | -  |
| -  | -                                                                                                                                                                                           | -         | -  |
| 28 | ABCA1, ABCG5, ABCG8, ANGPTL3, APOA1, APOB, APOE, CETP, EVI5, GPAM, HFE, HMGCR, HNF1A, HNF4A, LDLR, LDLRAP1, LIPC, LIPG, LPA, MAFB, MYLIP, NPC1L1, PCSK9, RAB3GAP1, RAF1, SORT1, TOP1, TRPS1 | 0.0000632 | 22 |
| 28 | ABCA1, ABCG5, ABCG8, ANGPTL3, APOA1, APOB, APOE, CETP, EVI5, GPAM, HFE, HMGCR, HNF1A, HNF4A, LDLR, LDLRAP1, LIPC, LIPG, LPA, MAFB, MYLIP, NPC1L1, PCSK9, RAB3GAP1, RAF1, SORT1, TOP1, TRPS1 | 0.0000682 | 22 |
| 26 | ABCA1, ANGPTL3, APOA1, APOB, APOE, CYP7A1, FADS1, GCKR, GPAM, HMGCR, HNF1A, HNF4A, IRF2BP2, LDLR, LDLRAP1, LIPG, LPA, MAFB, MAMSTR, MYLIP, PCSK9, RAB3GAP1, RAF1, SORT1, TRIB1, TRPS1       | 0.00015   | 20 |
| 24 | ABCA1, ANGPTL3, APOA1, APOB, APOE, CYP7A1, FADS1, GCKR, GPAM, HMGCR, HNF1A, HNF4A, IRF2BP2, LDLR, LDLRAP1, LIPG, MAFB, MAMSTR, MYLIP, PCSK9, RAB3GAP1, RAF1, TRIB1, TRPS1                   | 0.000422  | 18 |
| 23 | ABCA1, ABCG5, ABCG8, ANGPTL3, APOA1, APOB, APOE, CETP, ERGIC3, GCKR, GPAM, HFE, HNF1A, LDLR, LDLRAP1, LIPC, LIPG, LPA, NPC1L1, OSBPL7, PCSK9, SORT1, TRPS1                                  | 0.000158  | 18 |
| 22 | ABCA1, ABCG5, ABCG8, ANGPTL3, APOA1, APOB, APOE, CETP, CYP7A1, GCKR, HMGCR, HNF1A, HNF4A, IRF2BP2, LDLR, LDLRAP1, LIPC, MAFB, NPC1L1, PCSK9, TOP1, TRPS1                                    | 0.00019   | 19 |

|    |                                                                                                                                                    |           |    |
|----|----------------------------------------------------------------------------------------------------------------------------------------------------|-----------|----|
| 22 | ABCA1, ABCG5, ABCG8, APOA1, APOB, APOE, CETP, ERGIC3, GCKR, GPAM, HFE, HNF1A, LDLR, *LDLRAP1, LIPC, LIPG, LPA, NPC1L1, OSBPL7, PCSK9, SORT1, TRPS1 | 0.000125  | 16 |
| 22 | ABCA1, ABCG5, ABCG8, APOA1, APOB, APOE, CETP, ERGIC3, GCKR, GPAM, HFE, HNF1A, LDLR, LDLRAP1, LIPC, LIPG, LPA, NPC1L1, OSBPL7, PCSK9, SORT1, TRPS1  | 0.000163  | 16 |
| 21 | ABCA1, APOA1, APOE, CYP7A1, FADS1, GCKR, GPAM, HMGCR, HNF1A, HNF4A, IRF2BP2, LDLR, LIPG, MAFB, MAMSTR, MYLIP, PCSK9, RAB3GAP1, RAF1, TRIB1, TRPS1  | -         | -  |
| 19 | ABCA1, ABCG5, ABCG8, APOA1, APOE, BRAP, CETP, FRK, GPAM, HMGCR, HNF1A, HNF4A, MAFB, MYLIP, PCSK9, RAF1, SORT1, TRIB1, TRPS1                        | 0.000014  | 17 |
| 19 | ABCA1, ABCG5, ABCG8, APOA1, APOB, APOE, CETP, GCKR, GPAM, HNF1A, LDLR, LDLRAP1, LIPC, LIPG, LPA, NPC1L1, OSBPL7, SORT1, TRPS1                      | 8.83E-07  | 14 |
| 16 | ABCA1, APOA1, APOE, BRAP, CETP, FRK, GPAM, HMGCR, HNF1A, HNF4A, MAFB, PCSK9, RAF1, SORT1, TRIB1, TRPS1                                             | 0.000333  | 14 |
| 15 | ABCG5, ABCG8, ANGPTL3, APOA1, CETP, FADS1, FRK, GPAM, HMGCR, HNF4A, LIPC, LIPG, PCSK9, RAF1, TOP1                                                  | 0.000098  | 12 |
| 14 | ABCG5, ABCG8, ANGPTL3, APOA1, CETP, FADS1, FRK, GPAM, HMGCR, LIPC, LIPG, PCSK9, RAF1, TOP1                                                         | 0.0000657 | 12 |
| 14 | ABCG5, ABCG8, ANGPTL3, APOA1, APOE, GPAM, HMGCR, HNF4A, LIPG, MAFB, MAMSTR, MYLIP, PCSK9, TRPS1                                                    | 0.000553  | 11 |
| 13 | ABCA1, ANGPTL3, APOA1, APOB, APOE, CETP, FADS1, HMGCR, HNF4A, MAFB, MAMSTR, RAF1, TRPS1                                                            | -         | -  |
| 12 | ABCA1, APOA1, APOE, GPAM, HNF1A, HNF4A, LDLR, MAFB, MAMSTR, PCSK9, RAF1, TRIB1                                                                     | -         | -  |
| 11 | ABCA1, APOA1, APOB, APOE, CETP, *ERGIC3, HFE, LDLR, LDLRAP1, LPA, SORT1                                                                            | 0.0000303 | 9  |



|    |                                                                     |            |   |
|----|---------------------------------------------------------------------|------------|---|
| 10 | ABCA1, ANGPTL3, APOB, FADS1, GPAM, HNF4A, LDLR, PCSK9, RAF1, SORT1  | 0.000996   | 8 |
| 10 | ABCA1, APOA1, APOE, GCKR, HMGCR, HNF4A, LDLR, RAB3GAP1, RAF1, TRIB1 | -          | - |
| 10 | ABCA1, APOA1, APOE, GCKR, HMGCR, HNF4A, LDLR, RAB3GAP1, RAF1, TRIB1 | -          | - |
| 9  | ABCA1, APOB, APOE, CETP, *FADS1, MAFB, MAMSTR, *RAF1, TRPS1         | -          | - |
| 8  | *ANGPTL3, APOB, FADS1, GPAM, LDLR, PCSK9, RAF1, SORT1               | 0.0000911  | 8 |
| 7  | ABCG5, FADS1, *GPAM, HFE, HMGCR, LIPG, PCSK9                        | 0.0000288  | 6 |
| 7  | ABCG5, FADS1, GPAM, HFE, HMGCR, LIPG, PCSK9                         | 0.0000483  | 6 |
| 7  | FADS1, GPAM, HNF4A, LDLR, PCSK9, RAF1, SORT1                        | -          | - |
| 6  | ABCG5, ABCG8, APOA1, APOE, MYLIP, PCSK9                             | 0.00000297 | 7 |
| 6  | FADS1, GPAM, LDLR, PCSK9, RAF1, SORT1                               | 0.000114   | 6 |
| 6  | FADS1, GPAM, LDLR, PCSK9, RAF1, SORT1                               | 0.000129   | 6 |
| 6  | APOE, LDLR, MYLIP, PCSK9, RAB3GAP1, TRIB1                           | 0.00097    | 5 |
| 5  | APOA1, CYP7A1, HMGCR, HNF1A, NPC1L1                                 | 0.00000132 | 5 |
| 5  | ANGPTL3, *APOA1, LPA, RAF1, SORT1                                   | 0.0000251  | 5 |
| 5  | CYP7A1, GCKR, GPAM, HNF1A, HNF4A                                    | -          | - |
| 5  | CYP7A1, GCKR, GPAM, HNF1A, HNF4A                                    | -          | - |
| 5  | ABCG5, ABCG8, ANGPTL3, LIPC, LIPG                                   | -          | - |
| 5  | *FADS1, GPAM, PCSK9, RAF1, *SORT1                                   | -          | - |
| 4  | APOE, GCKR, HMGCR, TRIB1                                            | 0.00000726 | 5 |
| 4  | *ABCG5, *ABCG8, *LDLR, *NPC1L1                                      | 1.61E-10   | 4 |
| 4  | ABCG5, ABCG8, LDLR, NPC1L1                                          | 2.29E-09   | 4 |
| 4  | ABCG5, ABCG8, LDLR, NPC1L1                                          | 4.62E-08   | 4 |
| 4  | ABCG5, ABCG8, LDLR, NPC1L1                                          | 5.09E-07   | 4 |
| 4  | ABCG5, ABCG8, LDLR, NPC1L1                                          | 0.0000165  | 4 |
| 4  | APOE, MYLIP, PCSK9, TRIB1                                           | 0.000279   | 4 |
| 4  | CYP7A1, *GPAM, *HNF1A, *HNF4A                                       | -          | - |
| 3  | APOE, *MYLIP, *PCSK9                                                | 1.95E-08   | 3 |
| 3  | ABCG5, ABCG8, *APOA1                                                | 3.89E-08   | 3 |
| 3  | APOE, MYLIP, PCSK9                                                  | 3.89E-08   | 3 |
| 3  | *APOB, *LDLR, LDLRAP1                                               | 8.78E-07   | 3 |

|   |                         |            |   |
|---|-------------------------|------------|---|
| 3 | ABCG5, ABCG8, APOA1     | 0.00000773 | 3 |
| 3 | *APOA1, *HMGCR, *NPC1L1 | 0.0000201  | 3 |
| 3 | APOA1, HMGCR, NPC1L1    | 0.0000413  | 3 |
| 3 | APOB, APOE, CYP7A1      | 0.000114   | 3 |
| 3 | *FADS1, HFE, *PCSK9     | 0.000316   | 3 |
| 3 | APOE, *MYLIP, TRIB1     | 0.000436   | 3 |
| 3 | LIPG, MYLIP, PCSK9      | 0.000124   | 2 |
| 3 | ABCA1, APOE, RAF1       | -          | - |
| 3 | ABCA1, APOE, RAF1       | -          | - |
| 3 | ABCA1, APOE, RAF1       | -          | - |
| 3 | ABCA1, APOE, RAF1       | -          | - |
| 3 | ABCA1, APOE, RAF1       | -          | - |
| 3 | ABCA1, APOE, RAF1       | -          | - |
| 3 | ABCA1, APOE, RAF1       | -          | - |
| 3 | ABCA1, APOE, RAF1       | -          | - |
| 3 | ABCA1, APOE, RAF1       | -          | - |
| 3 | GPAM, HNF4A, LDLR       | -          | - |
| 3 | *GCKR, HNF1A, SORT1     | -          | - |
| 3 | APOE, CYP7A1, LIPC      | -          | - |
| 3 | *GCKR, HNF1A, SORT1     | -          | - |
| 3 | GCKR, HNF1A, SORT1      | -          | - |
| 3 | APOE, CYP7A1, LIPC      | -          | - |
| 3 | GCKR, HNF1A, SORT1      | -          | - |
| 2 | *ABCG5, *ABCG8          | 0.0000016  | 2 |
| 2 | *ABCG5, *ABCG8          | 0.0000016  | 2 |
| 2 | APOA1, LDLR             | 0.00000481 | 2 |
| 2 | *APOA1, *LDLR           | 0.00000481 | 2 |
| 2 | APOA1, LDLR             | 0.00000481 | 2 |
| 2 | *HNF1A, *SORT1          | 0.00000961 | 2 |
| 2 | *MYLIP, *PCSK9          | 0.00000961 | 2 |
| 2 | *ANGPTL3, *SORT1        | 0.000024   | 2 |
| 2 | MYLIP, PCSK9            | 0.0000335  | 2 |
| 2 | MYLIP, PCSK9            | 0.0000335  | 2 |
| 2 | *GPAM, *LDLR            | 0.0000876  | 2 |
| 2 | ABCG5, ABCG8            | 0.0000876  | 2 |
| 2 | ABCG5, ABCG8            | 0.0000876  | 2 |
| 2 | *APOE, *CYP7A1          | 0.000124   | 2 |
| 2 | APOE, CYP7A1            | 0.000124   | 2 |

|   |                 |          |    |
|---|-----------------|----------|----|
| 2 | ANGPTL3, SORT1  | 0.000124 | 2  |
| 2 | GPAM, LDLR      | 0.00019  | 2  |
| 2 | GPAM, LDLR      | 0.000215 | 2  |
| 2 | ABCG5, ABCG8    | 0.000242 | 2  |
| 2 | *CYP7A1, *HNF1A | 0.000399 | 2  |
| 2 | APOE, CYP7A1    | 0.000511 | 2  |
| 2 | GPAM, LDLR      | 0.000552 | 2  |
| 2 | ABCG5, ABCG8    | 0.000552 | 2  |
| 2 | *ABCA1, *CETP   | -        | -  |
| 2 | *ABCA1, LDLRAP1 | -        | -  |
| 2 | ABCA1, LDLRAP1  | -        | -  |
| 2 | *GCKR, *GPAM    | -        | -  |
| 2 | ABCA1, LDLRAP1  | -        | -  |
| 2 | *HNF1A, *HNF4A  | -        | -  |
| 2 | ABCA1, GPAM     | -        | -  |
| - | -               | 0.000823 | 37 |

|   |   |          |    |
|---|---|----------|----|
| - | - | 0.000823 | 37 |
|---|---|----------|----|

|   |   |          |   |
|---|---|----------|---|
| - | - | 0.000635 | 6 |
|---|---|----------|---|

|   |   |          |   |
|---|---|----------|---|
| - | - | 0.000635 | 6 |
|---|---|----------|---|

|   |   |           |   |
|---|---|-----------|---|
| - | - | 0.0000743 | 5 |
|---|---|-----------|---|

|   |   |           |   |
|---|---|-----------|---|
| - | - | 0.0000743 | 5 |
|---|---|-----------|---|

|   |   |           |   |
|---|---|-----------|---|
| - | - | 0.0000247 | 5 |
|---|---|-----------|---|

|   |   |           |   |
|---|---|-----------|---|
| - | - | 0.0000319 | 5 |
|---|---|-----------|---|

|   |   |           |   |
|---|---|-----------|---|
| - | - | 0.0000056 | 5 |
|---|---|-----------|---|

|   |   |         |   |
|---|---|---------|---|
| - | - | 0.00012 | 5 |
|---|---|---------|---|

|   |   |          |   |
|---|---|----------|---|
| - | - | 0.000434 | 5 |
|---|---|----------|---|

|   |   |           |   |
|---|---|-----------|---|
| - | - | 0.000599  | 5 |
| - | - | 0.000867  | 4 |
| - | - | 0.0000389 | 3 |
| - | - | 0.000185  | 3 |
| - | - | 0.000482  | 3 |
| - | - | 0.000582  | 3 |
| - | - | 0.000609  | 3 |
| - | - | 0.000805  | 3 |
| - | - | 0.000926  | 3 |
| - | - | 0.000124  | 2 |
| - | - | 0.000728  | 2 |
| - | - | 0.000776  | 2 |
| - | - | -         | - |

---

|   |   |   |   |
|---|---|---|---|
| - | - | - | - |
|---|---|---|---|

---

|   |   |   |   |
|---|---|---|---|
| - | - | - | - |
|---|---|---|---|

---

|   |   |   |   |
|---|---|---|---|
| - | - | - | - |
|---|---|---|---|

---

|   |   |   |   |
|---|---|---|---|
| - | - | - | - |
|---|---|---|---|

---

|   |   |   |   |
|---|---|---|---|
| - | - | - | - |
|---|---|---|---|

---

|   |   |   |   |
|---|---|---|---|
| - | - | - | - |
|---|---|---|---|

---

|   |   |   |   |
|---|---|---|---|
| - | - | - | - |
|---|---|---|---|



---

---

**LDL**

---

| <b>genes</b>                                                                                                                                                                                                                                                          | <b>p</b> | <b>k</b> |
|-----------------------------------------------------------------------------------------------------------------------------------------------------------------------------------------------------------------------------------------------------------------------|----------|----------|
| ABCG5, ABCG8, ABO, ANGPTL3, APOA1, APOB, APOE, BRAP, CETP, CYP7A1, DNAH11, FADS1, FADS2, FADS3, FRK, GPAM, HFE, HMGCR, HNF1A, IRF2BP2, LDLR, LDLRAP1, LPA, MAFB, MARC1, MYLIP, NPC1L1, *NYNRIN, OSBPL7, PCSK9, PLEC, PPP1R3B, PRKCA, SFN, SORT1, ST3GAL4, TOP1, TRIB1 | 1        | 34       |
| ABCG5, ABCG8, ABO, ANGPTL3, APOA1, APOB, APOE, CETP, CYP7A1, FADS1, FADS2, FADS3, FRK, GPAM, HFE, HMGCR, HNF1A, IRF2BP2, LDLR, LDLRAP1, LPA, MAFB, MARC1, MYLIP, NPC1L1, NYNRIN, PCSK9, PPP1R3B, PRKCA, ST3GAL4, TOP1                                                 | -        | -        |
| ABCG5, ABCG8, ABO, ANGPTL3, APOA1, APOB, APOE, CETP, CYP7A1, FADS1, FADS2, FADS3, FRK, GPAM, HMGCR, HNF1A, IRF2BP2, LDLR, LDLRAP1, LPA, MAFB, MARC1, MYLIP, NPC1L1, NYNRIN, PCSK9, PPP1R3B, PRKCA, ST3GAL4, TOP1                                                      | -        | -        |
| ABCG5, ABCG8, ABO, ANGPTL3, APOA1, APOB, APOE, CETP, CYP7A1, FADS1, FADS2, FADS3, FRK, GPAM, HMGCR, HNF1A, IRF2BP2, LDLR, LDLRAP1, LPA, MAFB, MYLIP, NPC1L1, NYNRIN, PCSK9, PPP1R3B, PRKCA, ST3GAL4, TOP1                                                             | -        | -        |
| ABCG5, ABCG8, ABO, ANGPTL3, APOA1, APOB, APOE, CETP, CYP7A1, FADS1, FADS2, FADS3, FRK, GPAM, HMGCR, HNF1A, IRF2BP2, LDLR, LDLRAP1, LPA, MAFB, MYLIP, NPC1L1, NYNRIN, PCSK9, PPP1R3B, PRKCA, ST3GAL4, TOP1                                                             | -        | -        |

---

|                                                                                                                                                                                                                                 |            |    |
|---------------------------------------------------------------------------------------------------------------------------------------------------------------------------------------------------------------------------------|------------|----|
| ABCG5, ABCG8, ABO, ANGPTL3, APOA1, APOB,<br>APOE, CETP, CYP7A1, FADS1, FADS2, FADS3,<br>FRK, GPAM, HMGCR, HNF1A, IRF2BP2, LDLR,<br>LDLRAP1, LPA, MAFB, MARC1, MYLIP, NPC1L1,<br>NYNRIN, PCSK9, PPP1R3B, PRKCA, ST3GAL4,<br>TOP1 | 0.00083    | 24 |
| *ABCG5, *ABCG8, ANGPTL3, *APOA1, *APOB,<br>*APOE, *CETP, *CYP7A1, *FADS1, *FADS2,<br>FADS3, *GPAM, *HMGCR, HNF1A, *LDLR,<br>LDLRAP1, *LPA, MARC1, *NPC1L1, PCSK9,<br>*PRKCA, *ST3GAL4                                           | 3.16E-07   | 16 |
| *ABCG5, *ABCG8, ANGPTL3, *APOA1, *APOB,<br>*APOE, *CETP, CYP7A1, FADS1, FADS2, FADS3,<br>GPAM, HMGCR, HNF1A, *LDLR, LDLRAP1,<br>*LPA, *NPC1L1, PCSK9                                                                            | 1.83E-11   | 16 |
| ABCG5, ABCG8, ANGPTL3, APOA1, APOB,<br>APOE, CETP, CYP7A1, GPAM, HFE, HNF1A,<br>LDLR, LDLRAP1, MYLIP, NPC1L1, PCSK9, PRKCA                                                                                                      | 0.00000203 | 15 |
| ABO, APOA1, APOB, APOE, CYP7A1, FADS1,<br>FADS2, FADS3, GPAM, HFE, HMGCR, HNF1A,<br>IRF2BP2, MAFB, NPC1L1, ST3GAL4, TOP1                                                                                                        | 0.0000339  | 18 |
| -                                                                                                                                                                                                                               | 0.0000225  | 18 |
| -                                                                                                                                                                                                                               | 0.0000154  | 18 |
| -                                                                                                                                                                                                                               | 0.0000154  | 18 |

|                                                                                                                            |            |    |
|----------------------------------------------------------------------------------------------------------------------------|------------|----|
| ABCG5, ANGPTL3, APOB, APOE, CYP7A1,<br>FADS1, GPAM, HMGCR, HNF1A, LDLR, MARC1,<br>PCSK9, PRKCA, SORT1, TOP1, TRIB1         | 0.000273   | 13 |
| -                                                                                                                          | -          | -  |
| ABCG5, ABCG8, ANGPTL3, APOA1, APOB,<br>APOE, CETP, CYP7A1, GPAM, HFE, HNF1A,<br>LDLR, LDLRAP1, MYLIP, NPC1L1, PCSK9, PRKCA | 2.07E-07   | 12 |
| ABCG5, ABCG8, ANGPTL3, APOA1, APOB,<br>APOE, CETP, GPAM, HNF1A, LDLRAP1, PCSK9,<br>PRKCA, SFN, TRIB1                       | 0.000165   | 9  |
| ANGPTL3, *APOA1, APOB, APOE, CETP,<br>*CYP7A1, *FADS1, FADS2, FADS3, *GPAM,<br>*HMGCR, HNF1A, PCSK9                        | 0.00000107 | 10 |
| ABCG5, ABCG8, ANGPTL3, APOA1, APOB,<br>APOE, CETP, GPAM, HNF1A, LDLR, LDLRAP1,<br>LPA, NPC1L1, OSBPL7                      | 0.000015   | 12 |
| ABCG5, ABCG8, ANGPTL3, APOA1, APOB,<br>APOE, CETP, CYP7A1, GPAM, HFE, HNF1A,<br>LDLR, LDLRAP1, MYLIP, NPC1L1, PCSK9, PRKCA | 3.83E-08   | 11 |
| ANGPTL3, APOB, APOE, CYP7A1, FADS1,<br>GPAM, HNF1A, LDLR, PCSK9, PRKCA, SORT1,<br>TRIB1                                    | 0.00000532 | 13 |
| ABCG5, ABCG8, *ANGPTL3, APOA1, APOB,<br>APOE, *CETP, CYP7A1, GPAM, LDLR, LDLRAP1,<br>MYLIP, NPC1L1, PCSK9                  | 6.34E-17   | 10 |
| ANGPTL3, APOA1, APOE, GPAM, HNF1A, LDLR,<br>LDLRAP1, MAFB, MYLIP, PCSK9, PRKCA, TRIB1                                      | -          | -  |
| ANGPTL3, APOA1, APOE, HMGCR, LDLRAP1,<br>LPA, PCSK9, PRKCA, SFN, SORT1, TRIB1                                              | -          | -  |
| ANGPTL3, APOA1, APOE, HMGCR, LPA, PCSK9,<br>PRKCA, SFN, SORT1, TRIB1                                                       | -          | -  |



|                                                                                               |           |   |
|-----------------------------------------------------------------------------------------------|-----------|---|
| -                                                                                             | -         | - |
| -                                                                                             | 0.0000223 | 9 |
| -                                                                                             | -         | - |
| ANGPTL3, APOA1, APOB, APOE, CETP, CYP7A1, HMGCR, HNF1A, LDLR, LDLRAP1, NPC1L1, PCSK9          | 8.19E-09  | 8 |
| ANGPTL3, APOA1, APOB, APOE, CETP, CYP7A1, HMGCR, HNF1A, LDLR, LDLRAP1, NPC1L1, PCSK9          | 4.88E-08  | 8 |
| ANGPTL3, CYP7A1, FADS1, FADS2, FADS3, GPAM, HNF1A, MARC1, ST3GAL4                             | -         | - |
| ANGPTL3, APOB, APOE, CYP7A1                                                                   | 0.000411  | 4 |
| -                                                                                             | 0.00053   | 9 |
| ABCG5, ABCG8, ANGPTL3, APOA1, APOB, APOE, CETP, HNF1A, LDLR, LDLRAP1, LPA, NPC1L1, OSBPL7     | 1.75E-11  | 9 |
| *ANGPTL3, *APOA1, *APOB, *APOE, *CETP, CYP7A1, HMGCR, *HNF1A, *LDLR, *LDLRAP1, NPC1L1, *PCSK9 | 1.42E-12  | 8 |
| ANGPTL3, APOA1, APOB, APOE, CETP, CYP7A1, HMGCR, HNF1A, LDLR, LDLRAP1, NPC1L1, PCSK9          | 3.54E-12  | 8 |
| ANGPTL3, APOA1, APOB, APOE, CETP, CYP7A1, HMGCR, HNF1A, LDLR, LDLRAP1, NPC1L1, PCSK9          | 2.54E-09  | 8 |
| ABCG5, ABCG8, APOA1, APOE, CETP, GPAM, HNF1A, LDLRAP1, PCSK9, PRKCA, SFN                      | -         | - |
| ABCG5, ABCG8, ANGPTL3, APOA1, CETP, FADS1, GPAM, HMGCR, PCSK9                                 | -         | - |
| ANGPTL3, CYP7A1, FADS1, FADS2, FADS3, GPAM, HNF1A, MARC1, ST3GAL4                             | -         | - |
| APOA1, CYP7A1, FADS1, FADS2, FADS3, GPAM, HMGCR, HNF1A, NPC1L1                                | 0.000251  | 6 |

|                                                                                                                |            |   |
|----------------------------------------------------------------------------------------------------------------|------------|---|
| APOA1, CYP7A1, FADS1, FADS2, FADS3,<br>HMGCR, HNF1A, NPC1L1                                                    | 0.000111   | 6 |
| APOA1, CYP7A1, FADS1, FADS2, FADS3,<br>HMGCR, HNF1A, NPC1L1                                                    | 0.000133   | 6 |
| -                                                                                                              | -          | - |
| ANGPTL3, CYP7A1, FADS1, FADS2, FADS3,<br>GPAM, HNF1A                                                           | -          | - |
| *ANGPTL3, APOA1, CETP, FADS1, *GPAM,<br>*PCSK9                                                                 | 0.0000269  | 6 |
| APOA1, APOB, APOE, CETP, GPAM, PCSK9                                                                           | 7.15E-07   | 7 |
| *ANGPTL3, *APOA1, *CETP                                                                                        | 1.04E-12   | 6 |
| *ANGPTL3, APOA1, CETP                                                                                          | 1.27E-12   | 6 |
| ABCG5, ABCG8, ANGPTL3, APOA1, APOB,<br>APOE, CETP, CYP7A1, LDLR, LDLRAP1, MYLIP,<br>NPC1L1, PCSK9              | 4.87E-12   | 7 |
| *ABCG5, *ABCG8, *ANGPTL3, *APOA1,<br>*APOB, *APOE, *CETP, *CYP7A1, *LDLR,<br>*LDLRAP1, *MYLIP, *NPC1L1, *PCSK9 | 4.87E-12   | 7 |
| ABCG5, ABCG8, APOA1, APOB, APOE, *CETP,<br>HNF1A, LDLR, LDLRAP1, *LPA, NPC1L1,<br>*OSBPL7                      | 7.39E-12   | 9 |
| ANGPTL3, APOA1, APOE, HMGCR, LPA, PCSK9,<br>PRKCA, SFN, SORT1, TRIB1                                           | 0.000265   | 6 |
| ANGPTL3, APOA1, APOE, HMGCR, LPA,<br>*PCSK9, PRKCA, SFN, SORT1, TRIB1                                          | 0.000606   | 5 |
| *APOA1, *APOB, *APOE, *CETP, *LDLR, *LPA,<br>*NPC1L1, *PCSK9                                                   | 9.3E-10    | 7 |
| ANGPTL3, APOA1, APOB, APOE, CYP7A1,<br>GPAM, LDLR, LDLRAP1                                                     | 0.00000076 | 6 |
| APOA1, APOB, APOE, CETP, LDLR, LDLRAP1                                                                         | 5.03E-13   | 7 |
| *ANGPTL3, FADS1, FADS2, FADS3, *GPAM,<br>HNF1A                                                                 | -          | - |
| APOA1, APOB, APOE, CETP                                                                                        | 5.69E-15   | 7 |

|                                                                          |            |   |
|--------------------------------------------------------------------------|------------|---|
| APOA1, APOB, APOE, CETP                                                  | 5.69E-15   | 7 |
| APOA1, APOB, APOE, CETP                                                  | 4.18E-13   | 6 |
| APOA1, APOB, APOE, CETP                                                  | 4.18E-13   | 6 |
| APOA1, APOB, APOE, CETP                                                  | 4.18E-13   | 6 |
| APOA1, APOE, HMGCR, PRKCA, SFN, TRIB1                                    | -          | - |
| -                                                                        | 0.000269   | 7 |
| -                                                                        | -          | - |
| -                                                                        | -          | - |
| -                                                                        | -          | - |
| -                                                                        | -          | - |
| -                                                                        | -          | - |
| ABCG5, ABCG8, *APOA1, *APOB, APOE, *CETP, HNF1A, *LDLR, LDLRAP1, *NPC1L1 | 3.92E-13   | 7 |
| *ABCG5, *ABCG8, APOA1, APOB, APOE, CETP, HNF1A, LDLR, LDLRAP1, *NPC1L1   | 3.92E-13   | 7 |
| ABCG5, ABCG8, APOA1, APOB, APOE, CETP, HNF1A, LDLR, LDLRAP1, NPC1L1      | 5.79E-12   | 7 |
| ANGPTL3, APOA1, APOE, GPAM, LDLR, LDLRAP1                                | 2.88E-07   | 5 |
| ANGPTL3, APOE, LDLR, MYLIP, PCSK9, TRIB1                                 | -          | - |
| APOA1, FADS1, FADS2, FADS3, *MARC1, PPP1R3B, PRKCA                       | -          | - |
| APOB, APOE, CETP, GPAM, PCSK9                                            | 1.97E-07   | 5 |
| APOB, APOE, CETP, GPAM, PCSK9                                            | 2.15E-07   | 5 |
| APOB, *APOE, *CETP, GPAM, *PCSK9                                         | 0.00000687 | 4 |
| CYP7A1, FADS1, FADS2, FADS3, HNF1A                                       | -          | - |
| CYP7A1, FADS1, FADS2, FADS3, HNF1A                                       | -          | - |
| CYP7A1, FADS1, FADS2, FADS3, HNF1A                                       | -          | - |
| FADS1, FADS2, FADS3, *HNF1A                                              | -          | - |
| ANGPTL3, APOE, MYLIP, TRIB1                                              | 0.0000591  | 4 |
| -                                                                        | -          | - |
| APOB, APOE, CETP, HFE, *LDLR, LDLRAP1, LPA, *SORT1                       | 0.00000613 | 6 |
| *APOB, *APOE, *CETP, *HFE, *LDLR, *LDLRAP1, *LPA                         | 0.0000127  | 4 |

|                                          |            |   |
|------------------------------------------|------------|---|
| *APOB, CYP7A1, FADS1, GPAM, HNF1A, PRKCA | 0.000177   | 4 |
| ABCG5, ABCG8, APOA1, APOE, CETP          | 5.09E-08   | 4 |
| ABCG5, ABCG8, APOA1, APOE, CETP          | 5.09E-08   | 4 |
| ABCG5, ABCG8, APOA1, APOE, CETP          | 0.00000157 | 4 |
| *APOA1, *APOE, *CETP, *HNF1A             | 3.86E-14   | 6 |
| APOA1, APOB, APOE, LDLR, LDLRAP1         | 1.04E-07   | 4 |
| *APOA1, *APOE, *CETP                     | 4.37E-12   | 5 |
| APOE, HMGCR, PRKCA, SFN, TRIB1           | -          | - |
| *APOB, *APOE, *CETP                      | 1.03E-09   | 4 |
| *ANGPTL3, *APOB, *APOE                   | 0.000043   | 3 |
| ANGPTL3, APOB, APOE                      | 0.0000749  | 3 |
| *APOE, *CETP                             | 5.06E-11   | 4 |
| APOE, CETP                               | 3.03E-10   | 4 |
| -                                        | 9.33E-07   | 4 |
| -                                        | 0.0000041  | 4 |
| APOE, HMGCR, PRKCA, SFN, TRIB1           | -          | - |
| -                                        | 0.0000574  | 5 |
| -                                        | 0.0000158  | 4 |
| -                                        | 0.0000312  | 4 |
| -                                        | 0.0000312  | 4 |
| -                                        | 0.0000784  | 4 |
| *ANGPTL3, *APOA1, *CETP, *GPAM           | 1.82E-10   | 4 |
| *ABCG8, APOA1, APOE, *CETP, *LDLR        | 1.42E-07   | 4 |
| ABCG8, APOA1, APOE, CETP, LDLR           | 9.92E-07   | 4 |
| APOB, APOE, CYP7A1, GPAM, LDLR           | 0.0000162  | 4 |
| APOA1, APOB, APOE, CYP7A1, LDLRAP1       | 0.000201   | 3 |
| *APOA1, *APOB, *APOE                     | 0.00000015 | 5 |
| APOA1, APOB, APOE                        | 1.96E-09   | 4 |
| APOA1, APOB, APOE                        | 1.96E-09   | 4 |
| -                                        | 0.000679   | 3 |
| -                                        | 0.000679   | 3 |
| *FADS1, *FADS2, *FADS3                   | -          | - |
| *FADS1, *FADS2, FADS3                    | -          | - |
| APOE, *CETP                              | 0.00000093 | 3 |

|                               |            |   |
|-------------------------------|------------|---|
| -                             | 0.0000154  | 3 |
| -                             | 0.000319   | 2 |
| -                             | 0.000409   | 2 |
| -                             | 0.000409   | 2 |
| -                             | 0.000233   | 3 |
| -                             | 0.000418   | 3 |
| -                             | 0.000468   | 3 |
| -                             | 0.000895   | 3 |
| -                             | 0.000927   | 3 |
| -                             | 0.000621   | 2 |
| -                             | -          | - |
| -                             | -          | - |
| -                             | -          | - |
| -                             | -          | - |
| -                             | -          | - |
| -                             | -          | - |
| *ABCG5, *ABCG8, *APOA1, *APOE | 0.00000353 | 3 |
| *APOB, *APOE, *LDLR           | 0.0000699  | 2 |
| APOA1, APOE, LDLRAP1          | 0.000475   | 2 |
| APOB, APOE, LDLRAP1           | 0.000661   | 2 |
| *APOA1, *APOE                 | 2.76E-08   | 3 |
| *APOA1, *APOE                 | 3.02E-07   | 3 |
| *APOA1, *APOE                 | 0.00000181 | 3 |
| -                             | 0.000099   | 2 |
| -                             | 0.000099   | 2 |
| -                             | 0.000831   | 2 |
| -                             | -          | - |
| *APOA1, *APOE                 | 0.0000268  | 2 |
| *APOA1, *APOE                 | 0.0000268  | 2 |
| APOA1, APOE                   | 0.0000458  | 2 |
| *APOB, APOE                   | 0.000291   | 2 |
| *FADS1, *FADS2                | -          | - |
| *FADS1, *FADS2                | -          | - |
| -                             | 0.0000458  | 2 |
| -                             | 0.0000458  | 2 |
| -                             | 0.0000699  | 2 |
| -                             | 0.000378   | 2 |
| *ANGPTL3, *APOA1              | -          | - |
| -                             | 0.0000067  | 3 |
| -                             | 0.00000962 | 3 |

|                                                                                                                                                           |           |    |
|-----------------------------------------------------------------------------------------------------------------------------------------------------------|-----------|----|
| -                                                                                                                                                         | 0.0000154 | 3  |
| -                                                                                                                                                         | 0.000877  | 2  |
| -                                                                                                                                                         | -         | -  |
| -                                                                                                                                                         | -         | -  |
| -                                                                                                                                                         | -         | -  |
| -                                                                                                                                                         | -         | -  |
| -                                                                                                                                                         | -         | -  |
| -                                                                                                                                                         | -         | -  |
| -                                                                                                                                                         | -         | -  |
| ABCG5, ABCG8, ANGPTL3, APOA1, APOB,<br>APOE, CETP, GPAM, HFE, HMGCR, HNF1A,<br>LDLR, LDLRAP1, LPA, MAFB, MYLIP, NPC1L1,<br>PCSK9, PRKCA, SFN, SORT1, TOP1 | -         | -  |
| ABCG5, ABCG8, ANGPTL3, APOA1, APOB,<br>APOE, CETP, GPAM, HFE, HMGCR, HNF1A,<br>LDLR, LDLRAP1, LPA, MAFB, MYLIP, NPC1L1,<br>PCSK9, PRKCA, SFN, SORT1, TOP1 | -         | -  |
| ANGPTL3, APOA1, APOB, APOE, CYP7A1,<br>FADS1, GPAM, HMGCR, HNF1A, IRF2BP2,<br>LDLR, LDLRAP1, LPA, MAFB, MYLIP, PCSK9,<br>PRKCA, SFN, SORT1, TRIB1         | 0.0000175 | 20 |
| ANGPTL3, APOA1, APOB, APOE, CYP7A1,<br>FADS1, GPAM, HMGCR, HNF1A, IRF2BP2,<br>LDLR, LDLRAP1, MAFB, MYLIP, PCSK9, PRKCA,<br>SFN, TRIB1                     | 0.0000687 | 18 |
| ABCG5, ABCG8, ANGPTL3, APOA1, APOB,<br>APOE, CETP, GPAM, HFE, HNF1A, LDLR,<br>LDLRAP1, LPA, NPC1L1, OSBPL7, PCSK9,<br>PRKCA, SORT1                        | 0.000398  | 16 |
| ABCG5, ABCG8, ANGPTL3, APOA1, APOB,<br>APOE, CETP, CYP7A1, HMGCR, HNF1A,<br>IRF2BP2, LDLR, LDLRAP1, MAFB, NPC1L1,<br>NYNRIN, PCSK9, PRKCA, TOP1           | 0.000412  | 17 |

|                                                                                                                    |           |    |
|--------------------------------------------------------------------------------------------------------------------|-----------|----|
| ABCG5, ABCG8, APOA1, APOB, APOE, CETP,<br>GPAM, HFE, HNF1A, LDLR, *LDLRAP1, LPA,<br>NPC1L1, OSBPL7, PCSK9, SORT1   | 0.000107  | 15 |
| ABCG5, ABCG8, APOA1, APOB, APOE, CETP,<br>GPAM, HFE, HNF1A, LDLR, LDLRAP1, LPA,<br>NPC1L1, OSBPL7, PCSK9, SORT1    | 0.000138  | 15 |
| -                                                                                                                  | 0.0003    | 17 |
| ABCG5, ABCG8, APOA1, APOE, BRAP, CETP,<br>FRK, GPAM, HMGCR, HNF1A, MAFB, MYLIP,<br>PCSK9, PRKCA, SFN, SORT1, TRIB1 | 0.000913  | 13 |
| ABCG5, ABCG8, APOA1, APOB, APOE, CETP,<br>GPAM, HNF1A, LDLR, LDLRAP1, LPA, NPC1L1,<br>OSBPL7, SORT1                | 0.0000538 | 11 |
| APOA1, APOE, BRAP, CETP, FRK, GPAM,<br>HMGCR, HNF1A, MAFB, PCSK9, PRKCA, SFN,<br>SORT1, TRIB1                      | 0.000354  | 13 |
| ABCG5, ABCG8, ANGPTL3, APOA1, CETP,<br>FADS1, FRK, GPAM, HMGCR, PCSK9, PRKCA,<br>TOP1                              | -         | -  |
| ABCG5, ABCG8, ANGPTL3, APOA1, CETP,<br>FADS1, FRK, GPAM, HMGCR, PCSK9, PRKCA,<br>TOP1                              | -         | -  |
| ABCG5, ABCG8, ANGPTL3, APOA1, APOE,<br>GPAM, HMGCR, MAFB, MYLIP, PCSK9, PRKCA                                      | 0.000187  | 11 |
| -                                                                                                                  | 0.0000248 | 11 |
| -                                                                                                                  | -         | -  |
| APOA1, APOB, APOE, CETP, HFE, LDLR,<br>LDLRAP1, LPA, SORT1                                                         | 0.000587  | 7  |

|                                                           |           |    |
|-----------------------------------------------------------|-----------|----|
| ANGPTL3, APOB, FADS1, GPAM, LDLR, PCSK9,<br>PRKCA, SORT1  | 0.0000107 | 10 |
| -                                                         | 0.0000629 | 9  |
| -                                                         | 0.0000666 | 9  |
| -                                                         | -         | -  |
| *ANGPTL3, APOB, FADS1, GPAM, LDLR, PCSK9,<br>PRKCA, SORT1 | 0.000291  | 7  |
| ABCG5, FADS1, *GPAM, HFE, HMGCR, PCSK9                    | -         | -  |
| ABCG5, FADS1, GPAM, HFE, HMGCR, PCSK9                     | -         | -  |
| -                                                         | -         | -  |
| ABCG5, ABCG8, APOA1, APOE, MYLIP, PCSK9,<br>PRKCA         | -         | -  |
| FADS1, GPAM, LDLR, PCSK9, *PRKCA, SORT1                   | -         | -  |
| FADS1, GPAM, LDLR, PCSK9, PRKCA, SORT1                    | -         | -  |
| APOE, LDLR, MYLIP, PCSK9, TRIB1                           | -         | -  |
| APOA1, CYP7A1, HMGCR, HNF1A, NPC1L1                       | -         | -  |
| ANGPTL3, *APOA1, LPA, SFN, SORT1                          | -         | -  |
| -                                                         | -         | -  |
| -                                                         | -         | -  |
| -                                                         | -         | -  |
| -                                                         | -         | -  |
| APOE, HMGCR, PRKCA, SFN, TRIB1                            | -         | -  |
| *ABCG5, *ABCG8, *LDLR, *NPC1L1                            | -         | -  |
| ABCG5, ABCG8, LDLR, NPC1L1                                | -         | -  |
| ABCG5, ABCG8, LDLR, NPC1L1                                | -         | -  |
| ABCG5, ABCG8, LDLR, NPC1L1                                | -         | -  |
| ABCG5, ABCG8, LDLR, NPC1L1                                | -         | -  |
| APOE, MYLIP, PCSK9, TRIB1                                 | -         | -  |
| -                                                         | -         | -  |
| APOE, *MYLIP, *PCSK9                                      | -         | -  |
| ABCG5, ABCG8, *APOA1                                      | -         | -  |
| APOE, MYLIP, PCSK9                                        | -         | -  |
| *APOB, *LDLR, LDLRAP1                                     | -         | -  |



|                         |           |   |
|-------------------------|-----------|---|
| ABCG5, ABCG8, APOA1     | -         | - |
| *APOA1, *HMGCR, *NPC1L1 | -         | - |
| APOA1, HMGCR, NPC1L1    | -         | - |
| APOB, APOE, CYP7A1      | -         | - |
| *FADS1, HFE, *PCSK9     | -         | - |
| APOE, *MYLIP, TRIB1     | -         | - |
| MYLIP, PCSK9            | -         | - |
| -                       | 0.0000814 | 3 |
| -                       | 0.0000848 | 3 |
| -                       | 0.0000848 | 3 |
| -                       | 0.0000882 | 3 |
| -                       | 0.0000955 | 3 |
| -                       | 0.0000955 | 3 |
| -                       | 0.000253  | 3 |
| -                       | 0.00026   | 3 |
| -                       | 0.00026   | 3 |
| -                       | 0.000329  | 3 |
| -                       | -         | - |
| -                       | -         | - |
| -                       | -         | - |
| -                       | -         | - |
| -                       | -         | - |
| -                       | -         | - |
| -                       | -         | - |
| -                       | -         | - |
| *ABCG5, *ABCG8          | -         | - |
| *ABCG5, *ABCG8          | -         | - |
| APOA1, LDLR             | -         | - |
| *APOA1, *LDLR           | -         | - |
| APOA1, LDLR             | -         | - |
| *HNF1A, *SORT1          | -         | - |
| *MYLIP, *PCSK9          | -         | - |
| *ANGPTL3, *SORT1        | -         | - |
| MYLIP, PCSK9            | -         | - |
| MYLIP, PCSK9            | -         | - |
| *GPAM, *LDLR            | -         | - |
| ABCG5, ABCG8            | -         | - |
| ABCG5, ABCG8            | -         | - |
| *APOE, *CYP7A1          | -         | - |
| APOE, CYP7A1            | -         | - |

|                                                                                                                                                                                                                                                                                |          |   |
|--------------------------------------------------------------------------------------------------------------------------------------------------------------------------------------------------------------------------------------------------------------------------------|----------|---|
| ANGPTL3, SORT1                                                                                                                                                                                                                                                                 | -        | - |
| GPAM, LDLR                                                                                                                                                                                                                                                                     | -        | - |
| GPAM, LDLR                                                                                                                                                                                                                                                                     | -        | - |
| ABCG5, ABCG8                                                                                                                                                                                                                                                                   | -        | - |
| *CYP7A1, *HNF1A                                                                                                                                                                                                                                                                | -        | - |
| APOE, CYP7A1                                                                                                                                                                                                                                                                   | -        | - |
| GPAM, LDLR                                                                                                                                                                                                                                                                     | -        | - |
| ABCG5, ABCG8                                                                                                                                                                                                                                                                   | -        | - |
| -                                                                                                                                                                                                                                                                              | 0.000099 | 2 |
| -                                                                                                                                                                                                                                                                              | -        | - |
| -                                                                                                                                                                                                                                                                              | -        | - |
| -                                                                                                                                                                                                                                                                              | -        | - |
| -                                                                                                                                                                                                                                                                              | -        | - |
| -                                                                                                                                                                                                                                                                              | -        | - |
| -                                                                                                                                                                                                                                                                              | -        | - |
| ABCG5, ABCG8, ABO, ANGPTL3, APOA1, APOB,<br>APOE, BRAP, CETP, CYP7A1, DNAH11, FADS1,<br>FADS2, FADS3, FRK, GPAM, HFE, HMGCR,<br>HNF1A, IRF2BP2, LDLR, LDLRAP1, LPA, MAFB,<br>MARC1, MYLIP, NPC1L1, NYNRIN, PCSK9, PLEC,<br>PPP1R3B, PRKCA, SFN, SORT1, ST3GAL4, TOP1,<br>TRIB1 | -        | - |
| ABCG5, ABCG8, ABO, ANGPTL3, APOA1, APOB,<br>APOE, BRAP, CETP, CYP7A1, DNAH11, FADS1,<br>FADS2, FADS3, FRK, GPAM, HFE, HMGCR,<br>HNF1A, IRF2BP2, LDLR, LDLRAP1, LPA, MAFB,<br>MARC1, MYLIP, NPC1L1, NYNRIN, PCSK9, PLEC,<br>PPP1R3B, PRKCA, SFN, SORT1, ST3GAL4, TOP1,<br>TRIB1 | -        | - |
| APOA1, GPAM, HNF1A, LDLRAP1, PRKCA, SFN                                                                                                                                                                                                                                        | -        | - |
| APOA1, GPAM, HNF1A, LDLRAP1, PRKCA, SFN                                                                                                                                                                                                                                        | -        | - |
| APOE, HMGCR, PRKCA, SFN, TRIB1                                                                                                                                                                                                                                                 | 0.000623 | 4 |
| APOE, HMGCR, PRKCA, SFN, TRIB1                                                                                                                                                                                                                                                 | 0.000623 | 4 |
| APOE, HMGCR, PRKCA, SFN, TRIB1                                                                                                                                                                                                                                                 | 0.00026  | 4 |
| APOE, HMGCR, PRKCA, SFN, TRIB1                                                                                                                                                                                                                                                 | 0.000319 | 4 |
| APOE, HMGCR, PRKCA, *SFN, *TRIB1                                                                                                                                                                                                                                               | -        | - |
| *APOE, *FADS1, *HMGCR, *LDLR, *PRKCA                                                                                                                                                                                                                                           | -        | - |
| APOE, HMGCR, PRKCA, SFN, TRIB1                                                                                                                                                                                                                                                 | -        | - |

|                                |           |    |
|--------------------------------|-----------|----|
| APOE, HMGCR, PRKCA, SFN, TRIB1 | -         | -  |
| APOE, HMGCR, PRKCA, *TRIB1     | -         | -  |
| LDLRAP1, PCSK9, *PRKCA         | -         | -  |
| *APOE, *HMGCR, PRKCA           | -         | -  |
| APOE, HMGCR, PRKCA             | -         | -  |
| APOA1, HMGCR, NPC1L1           | -         | -  |
| ANGPTL3, PRKCA, SORT1          | -         | -  |
| FADS1, HFE, PCSK9              | -         | -  |
| FADS1, HFE, PCSK9              | -         | -  |
| PRKCA, TRIB1                   | -         | -  |
| APOE, PRKCA                    | -         | -  |
| *LDLRAP1, PCSK9                | -         | -  |
| -                              | 0.000392  | 27 |
| -                              | 0.000485  | 26 |
| -                              | 0.0000578 | 16 |
| -                              | 0.0000578 | 16 |
| -                              | 0.00022   | 15 |
| -                              | 0.000613  | 13 |
| -                              | 0.000613  | 13 |

---

|       |           |    |
|-------|-----------|----|
| -     | 0.000719  | 13 |
| <hr/> |           |    |
| -     | 0.000719  | 13 |
| <hr/> |           |    |
| -     | 0.000533  | 8  |
| <hr/> |           |    |
| -     | 0.0000857 | 7  |
| <hr/> |           |    |
| -     | 0.000925  | 6  |
| <hr/> |           |    |
| -     | 0.000386  | 4  |
| <hr/> |           |    |
| -     | 0.0000246 | 3  |
| <hr/> |           |    |
| -     | 0.000226  | 3  |
| <hr/> |           |    |
| -     | 0.0000128 | 2  |
| <hr/> |           |    |
| -     | 0.000133  | 2  |
| <hr/> |           |    |
| -     | 0.000172  | 2  |
| <hr/> |           |    |
| -     | 0.000172  | 2  |
| <hr/> |           |    |
| -     | 0.000441  | 2  |
| <hr/> |           |    |
| -     | 0.00051   | 2  |
| <hr/> |           |    |
| -     | 0.000621  | 2  |
| <hr/> |           |    |
| -     | 0.000621  | 2  |
| <hr/> |           |    |
| -     | 0.000787  | 2  |
| <hr/> |           |    |

---

---

---

## HDL

---

### genes

---

ABCA1, ABCA8, ANGPTL4, APOA1, APOB,  
APOE, ARL15, \*C6orf106, CETP, CITED2,  
FADS1, GALNT2, HNF4A, IRS1, KLF14,  
LCAT, LILRA3, LIPC, LPA, LRP4, MC4R,  
MLXIPL, PDE3A, PGS1, PLTP, PPP1R3B,  
\*SBNO1, SLC39A8, STARD3, TRIB1, TRPS1,  
UBE2L3, ZNF648, \*ZNF664

---

-

---

-

---

-

---

-

---

-

---

---

ABCA1, ANGPTL4, APOA1, APOB, APOE,  
CETP, FADS1, GALNT2, HNF4A, KLF14,  
LCAT, LIPC, LPA, MC4R, MLXIPL, PDE3A,  
PGS1, PLTP, PPP1R3B, STARD3, TRPS1,  
UBE2L3, ZNF648, ZNF664

---

\*ABCA1, \*ANGPTL4, \*APOA1, \*APOB,  
\*APOE, \*CETP, \*FADS1, HNF4A, \*LCAT,  
LIPC, \*LPA, \*MLXIPL, PDE3A, \*PGS1,  
PLTP, STARD3

---

\*ABCA1, ANGPTL4, \*APOA1, \*APOB,  
\*APOE, \*CETP, FADS1, \*HNF4A, IRS1,  
\*LCAT, LIPC, \*LPA, \*PDE3A, PGS1, \*PLTP,  
\*STARD3

---

ABCA1, ANGPTL4, APOA1, APOB, APOE,  
CETP, CITED2, HNF4A, IRS1, LCAT, LIPC,  
MC4R, MLXIPL, PDE3A, STARD3

---

ABCA1, APOA1, APOB, APOE, FADS1,  
GALNT2, HNF4A, KLF14, LCAT, LIPC,  
MLXIPL, PGS1, PLTP, STARD3, TRPS1,  
UBE2L3, ZNF648, ZNF664

---

ABCA1, APOA1, APOB, APOE, FADS1,  
GALNT2, HNF4A, KLF14, LCAT, LIPC,  
MLXIPL, PGS1, PLTP, STARD3, TRPS1,  
UBE2L3, ZNF648, ZNF664

---

ABCA1, APOA1, APOB, APOE, FADS1,  
GALNT2, HNF4A, KLF14, LCAT, LIPC,  
MLXIPL, PGS1, PLTP, STARD3, TRPS1,  
UBE2L3, ZNF648, ZNF664

---

ABCA1, APOA1, APOB, APOE, FADS1,  
GALNT2, HNF4A, KLF14, LCAT, LIPC,  
MLXIPL, PGS1, PLTP, STARD3, TRPS1,  
UBE2L3, ZNF648, ZNF664

---

---

ABCA1, APOB, APOE, CITED2, FADS1,  
HNF4A, IRS1, LCAT, MC4R, MLXIPL,  
PDE3A, TRIB1, UBE2L3

---

-

---

ABCA1, ANGPTL4, APOA1, APOB, APOE,  
CETP, CITED2, HNF4A, IRS1, LCAT, LIPC,  
MLXIPL

---

---

ABCA1, APOA1, APOB, APOE, CETP,  
CITED2, HNF4A, IRS1, TRIB1

---

---

\*ABCA1, \*ANGPTL4, \*APOA1, APOB,  
APOE, CETP, \*FADS1, LCAT, LIPC, PGS1

---

---

ABCA1, APOA1, APOB, APOE, CETP, IRS1,  
LCAT, LIPC, LPA, LRP4, PLTP, TRPS1

---

---

ABCA1, ANGPTL4, APOA1, APOB, APOE,  
CETP, HNF4A, IRS1, LCAT, LIPC, MLXIPL

---

---

ABCA1, APOB, APOE, CITED2, FADS1,  
HNF4A, IRS1, LCAT, MC4R, MLXIPL,  
PDE3A, TRIB1, UBE2L3

---

---

ABCA1, ANGPTL4, APOA1, APOB, APOE,  
\*CETP, \*HNF4A, LCAT, LIPC, MLXIPL

---

-

---

-

---

-

---

---

-

---

ABCA1, ANGPTL4, APOA1, APOB, APOE,  
CETP, IRS1, LCAT, LIPC

---

-

---

ABCA1, APOA1, APOB, APOE, CETP, LCAT,  
LIPC, STARD3

---

---

ABCA1, APOA1, APOB, APOE, CETP, LCAT,  
LIPC, STARD3

---

-

---

APOB, APOE, \*IRS1, LIPC

---

---

ABCA1, APOB, APOE, CITED2, HNF4A,  
IRS1, MLXIPL, PDE3A, UBE2L3

---

---

ABCA1, APOA1, APOB, APOE, CETP, LCAT,  
LIPC, LPA, PLTP

---

---

\*ABCA1, \*APOA1, \*APOB, \*APOE, \*CETP,  
\*LCAT, \*LIPC, \*STARD3

---

---

ABCA1, APOA1, APOB, APOE, CETP, LCAT,  
LIPC, STARD3

---

---

ABCA1, APOA1, APOB, APOE, CETP, LCAT,  
LIPC, \*STARD3

---

-

---

-

---

-

---

APOA1, FADS1, LCAT, LIPC, PGS1, STARD3

---



---

APOA1, FADS1, LCAT, LIPC, PLTP, STARD3

---

APOA1, FADS1, LCAT, LIPC, PLTP, STARD3

---

-

---

APOA1, CETP, FADS1, \*LCAT, LIPC, \*PGS1

---

APOA1, APOB, APOE, CETP, LCAT, LIPC,  
PGS1

---

\*ANGPTL4, \*APOA1, \*CETP, \*HNF4A,  
\*LIPC, \*MLXIPL

---

ANGPTL4, APOA1, CETP, HNF4A, LIPC,  
MLXIPL

---

ABCA1, APOA1, APOB, APOE, CETP, LCAT,  
LIPC

---

\*ABCA1, \*APOA1, \*APOB, \*APOE, \*CETP,  
\*LCAT, \*LIPC

---

ABCA1, APOA1, APOB, APOE, \*CETP,  
LCAT, LIPC, \*LPA, \*PLTP

---

ANGPTL4, APOA1, APOE, HNF4A, LPA,  
TRIB1

---

ANGPTL4, APOA1, APOE, LPA, TRIB1

---

\*ABCA1, \*APOA1, \*APOB, \*APOE, \*CETP,  
\*LCAT, \*LPA

---

APOA1, APOB, APOE, \*HNF4A, IRS1,  
MLXIPL

---

ABCA1, APOA1, APOB, APOE, CETP, LCAT,  
LIPC

---

-

---

ABCA1, APOA1, APOB, APOE, CETP, LCAT,  
LIPC

---

---

ABCA1, APOA1, APOB, APOE, CETP, LCAT,  
LIPC

---

APOA1, APOB, APOE, CETP, LCAT, LIPC

---

APOA1, APOB, APOE, CETP, LCAT, LIPC

---

APOA1, APOB, APOE, CETP, LCAT, LIPC

---

-

---

APOA1, APOE, HNF4A, IRS1, LRP4,  
MLXIPL, TRIB1

---

-

---

-

---

-

---

-

---

-

---

ABCA1, \*APOA1, \*APOB, APOE, \*CETP,  
\*LCAT, LIPC

---

ABCA1, APOA1, APOB, APOE, CETP, LCAT,  
LIPC

---

ABCA1, APOA1, APOB, APOE, CETP, LCAT,  
LIPC

---

APOA1, APOE, HNF4A, IRS1, MLXIPL

---

-

---

-

---

APOB, APOE, CETP, LIPC, PGS1

---

APOB, APOE, CETP, LIPC, PGS1

---

APOB, \*APOE, \*CETP, LIPC

---

-

---

-

---

-

---

-

---

APOE, IRS1, MLXIPL, TRIB1

---

-

---

ABCA1, APOB, APOE, CETP, LPA, \*LRP4

---

\*APOB, \*APOE, \*CETP, \*LPA

---

---

\*APOB, FADS1, HNF4A, MLXIPL

---

ABCA1, APOA1, APOE, CETP

---

ABCA1, APOA1, APOE, CETP

---

ABCA1, APOA1, APOE, CETP

---

\*ABCA1, \*APOA1, \*APOE, \*CETP, \*LCAT,  
\*LIPC

---

APOA1, APOB, APOE, LIPC

---

\*APOA1, \*APOE, \*CETP, \*LCAT, \*LIPC

---

-

---

\*APOB, \*APOE, \*CETP, \*LIPC

---

\*APOB, \*APOE, CITED2

---

APOB, APOE, CITED2

---

\*APOE, \*CETP, \*LCAT, \*LIPC

---

APOE, CETP, LCAT, LIPC

---

APOA1, \*CETP, LCAT, LIPC

---

APOA1, CETP, LCAT, LIPC

---

-

---

APOA1, CETP, LCAT, LIPC, PGS1

---

APOE, IRS1, MLXIPL, TRIB1

---

APOA1, CETP, LCAT, LIPC

---

APOA1, CETP, LCAT, LIPC

---

APOA1, CETP, LCAT, LIPC

---

\*ABCA1, \*APOA1, \*CETP, \*HNF4A

---

ABCA1, APOA1, APOE, \*CETP

---

ABCA1, APOA1, APOE, CETP

---

APOB, APOE, HNF4A, MLXIPL

---

APOA1, APOB, APOE

---

ABCA1, \*APOA1, \*APOB, \*APOE, \*LCAT

---

ABCA1, APOA1, APOB, APOE

---

ABCA1, APOA1, APOB, APOE

---

HNF4A, IRS1, MLXIPL

---

\*HNF4A, \*IRS1, \*MLXIPL

---

-

---

-

---

ABCA1, APOE, \*CETP

---

---

ABCA1, APOB, CETP

---

\*APOB, \*LIPC

---

APOB, LIPC

---

APOB, LIPC

---

HNF4A, IRS1, MLXIPL

---

HNF4A, IRS1, MLXIPL

---

HNF4A, IRS1, MLXIPL

---

APOE, \*CITED2, TRIB1

---

APOE, CITED2, TRIB1

---

APOB, LIPC

---

-

---

-

---

-

---

-

---

-

---

-

---

\*ABCA1, \*APOA1, \*APOE

---

\*APOB, \*APOE

---

APOA1, APOE

---

APOB, APOE

---

\*ABCA1, \*APOA1, \*APOE

---

\*ABCA1, \*APOA1, \*APOE

---

\*ABCA1, \*APOA1, \*APOE

---

ABCA1, APOE

---

ABCA1, APOE

---

ABCA1, APOE

---

-

---

\*APOA1, \*APOE

---

\*APOA1, \*APOE

---

APOA1, APOE

---

\*APOB, APOE

---

-

---

-

---

\*APOE, \*LIPC

---

APOE, LIPC

---

\*ABCA1, \*APOE

---

ABCA1, APOB

---

-

---

HNF4A, \*IRS1, MLXIPL

---

HNF4A, IRS1, MLXIPL

---

HNF4A, IRS1, MLXIPL

---

\*APOB, \*PLTP

---

-

---

-

---

-

---

-

---

-

---

-

---

-

---

-

---

-

---

-

---

ABCA1, ANGPTL4, APOA1, APOB, APOE,  
CITED2, FADS1, HNF4A, IRS1, KLF14, LPA,  
LRP4, MC4R, MLXIPL, SBNO1, TRIB1,  
TRPS1, UBE2L3, ZNF648, ZNF664

---

ABCA1, APOA1, APOB, APOE, CITED2,  
FADS1, HNF4A, IRS1, KLF14, LRP4, MC4R,  
MLXIPL, SBNO1, TRIB1, TRPS1, UBE2L3,  
ZNF648, ZNF664

---

ABCA1, ABCA8, APOA1, APOB, APOE,  
CETP, IRS1, LCAT, LIPC, LPA, LRP4, MC4R,  
PLTP, SLC39A8, STARD3, TRPS1

---

ABCA1, APOA1, APOB, APOE, CETP,  
HNF4A, KLF14, LCAT, LIPC, MLXIPL,  
PDE3A, PLTP, STARD3, TRPS1, UBE2L3,  
ZNF648, ZNF664

---

---

ABCA1, \*ABCA8, APOA1, APOB, APOE,  
CETP, LCAT, LIPC, LPA, LRP4, MC4R, PLTP,  
SLC39A8, STARD3, TRPS1

---

ABCA1, ABCA8, APOA1, APOB, APOE,  
CETP, LCAT, LIPC, LPA, LRP4, MC4R, PLTP,  
SLC39A8, STARD3, TRPS1

---

ABCA1, APOA1, APOE, CITED2, FADS1,  
HNF4A, IRS1, KLF14, LRP4, MC4R, MLXIPL,  
SBNO1, TRIB1, TRPS1, UBE2L3, ZNF648,  
ZNF664

---

ABCA1, ANGPTL4, APOA1, APOE, CETP,  
CITED2, HNF4A, IRS1, LRP4, MLXIPL,  
PDE3A, TRIB1, TRPS1

---

ABCA1, APOA1, APOB, APOE, CETP, LCAT,  
LIPC, LPA, MC4R, PLTP, TRPS1

---

ABCA1, ANGPTL4, APOA1, APOE, CETP,  
CITED2, HNF4A, IRS1, LRP4, MLXIPL,  
PDE3A, TRIB1, TRPS1

---

-

---

-

---

ANGPTL4, APOA1, APOE, CITED2, HNF4A,  
LCAT, LRP4, MC4R, MLXIPL, PDE3A, TRPS1

---

ABCA1, ANGPTL4, APOA1, APOB, APOE,  
CETP, CITED2, FADS1, HNF4A, PDE3A,  
TRPS1

---

-

---

ABCA1, APOA1, APOB, APOE, CETP, LPA,  
LRP4

---

---

ABCA1, APOB, CITED2, FADS1, HNF4A,  
IRS1, LCAT, MC4R, PDE3A, UBE2L3

---

ABCA1, APOA1, APOE, HNF4A, IRS1, LRP4,  
MC4R, MLXIPL, TRIB1

---

ABCA1, APOA1, APOE, HNF4A, IRS1, LRP4,  
MC4R, MLXIPL, TRIB1

---

-

---

APOB, CITED2, FADS1, IRS1, LCAT, MC4R,  
UBE2L3

---

-

---

-

---

-

---

-

---

-

---

-

---

-

---

-

---

-

---

-

---

-

---

-

---

-

---

-

---

-

---

-

---

-

---

-

---

-

---

-

---

-

---

-

---

-

---

-

---

-

---

-  
-  
-  
-  
-  
-  
-  
-  
-

ABCA1, APOE, MC4R  
ABCA1, APOE, MC4R

ABCA1, APOE, MC4R  
ABCA1, APOE, MC4R  
ABCA1, APOE, MC4R  
ABCA1, APOE, MC4R  
ABCA1, APOE, MC4R  
ABCA1, APOE, MC4R  
ABCA1, APOE, MC4R  
ABCA1, APOE, MC4R

-  
-  
-  
-  
-  
-  
-  
-  
-  
-  
-  
-  
-  
-  
-  
-  
-  
-  
-  
-  
-

-  
-  
-  
-  
-  
-  
-  
-  
-  
-



---

-

---

-

---

-

---

-

---

-

---

-

---

-

---

-

---

\*ABCA1, \*CETP

---

-

---

-

---

-

---

-

---

-

---

-

---

-

---

-

---

-

---

-

---

APOE, HNF4A, MLXIPL, TRIB1

---

-

---

-

---

-



---

ABCA1, APOA1, APOB, APOE, GALNT2,  
HNF4A, KLF14, LCAT, MLXIPL, TRPS1,  
UBE2L3, ZNF648, ZNF664

---

ABCA1, APOA1, APOB, APOE, GALNT2,  
HNF4A, KLF14, LCAT, MLXIPL, TRPS1,  
UBE2L3, ZNF648, ZNF664

---

ABCA1, APOB, APOE, CITED2, IRS1,  
MLXIPL, PDE3A, UBE2L3

---

ABCA1, APOB, CITED2, FADS1, LCAT,  
TRIB1, UBE2L3

---

CITED2, \*FADS1, HNF4A, LCAT, PDE3A,  
UBE2L3

---

APOA1, \*FADS1, LCAT, PGS1

---

HNF4A, IRS1, MLXIPL

---

HNF4A, IRS1, MLXIPL

---

\*APOE, \*PDE3A

---

\*HNF4A, \*MLXIPL

---

\*APOE, MC4R

---

\*APOE, MC4R

---

\*APOA1, \*LCAT

---

APOE, PDE3A

---

APOA1, \*HNF4A

---

ABCA1, \*CITED2

---

HNF4A, \*MLXIPL

---

---

---

---

---

---

---

---

---

---

---

---

---

---

---

---

---

---

---

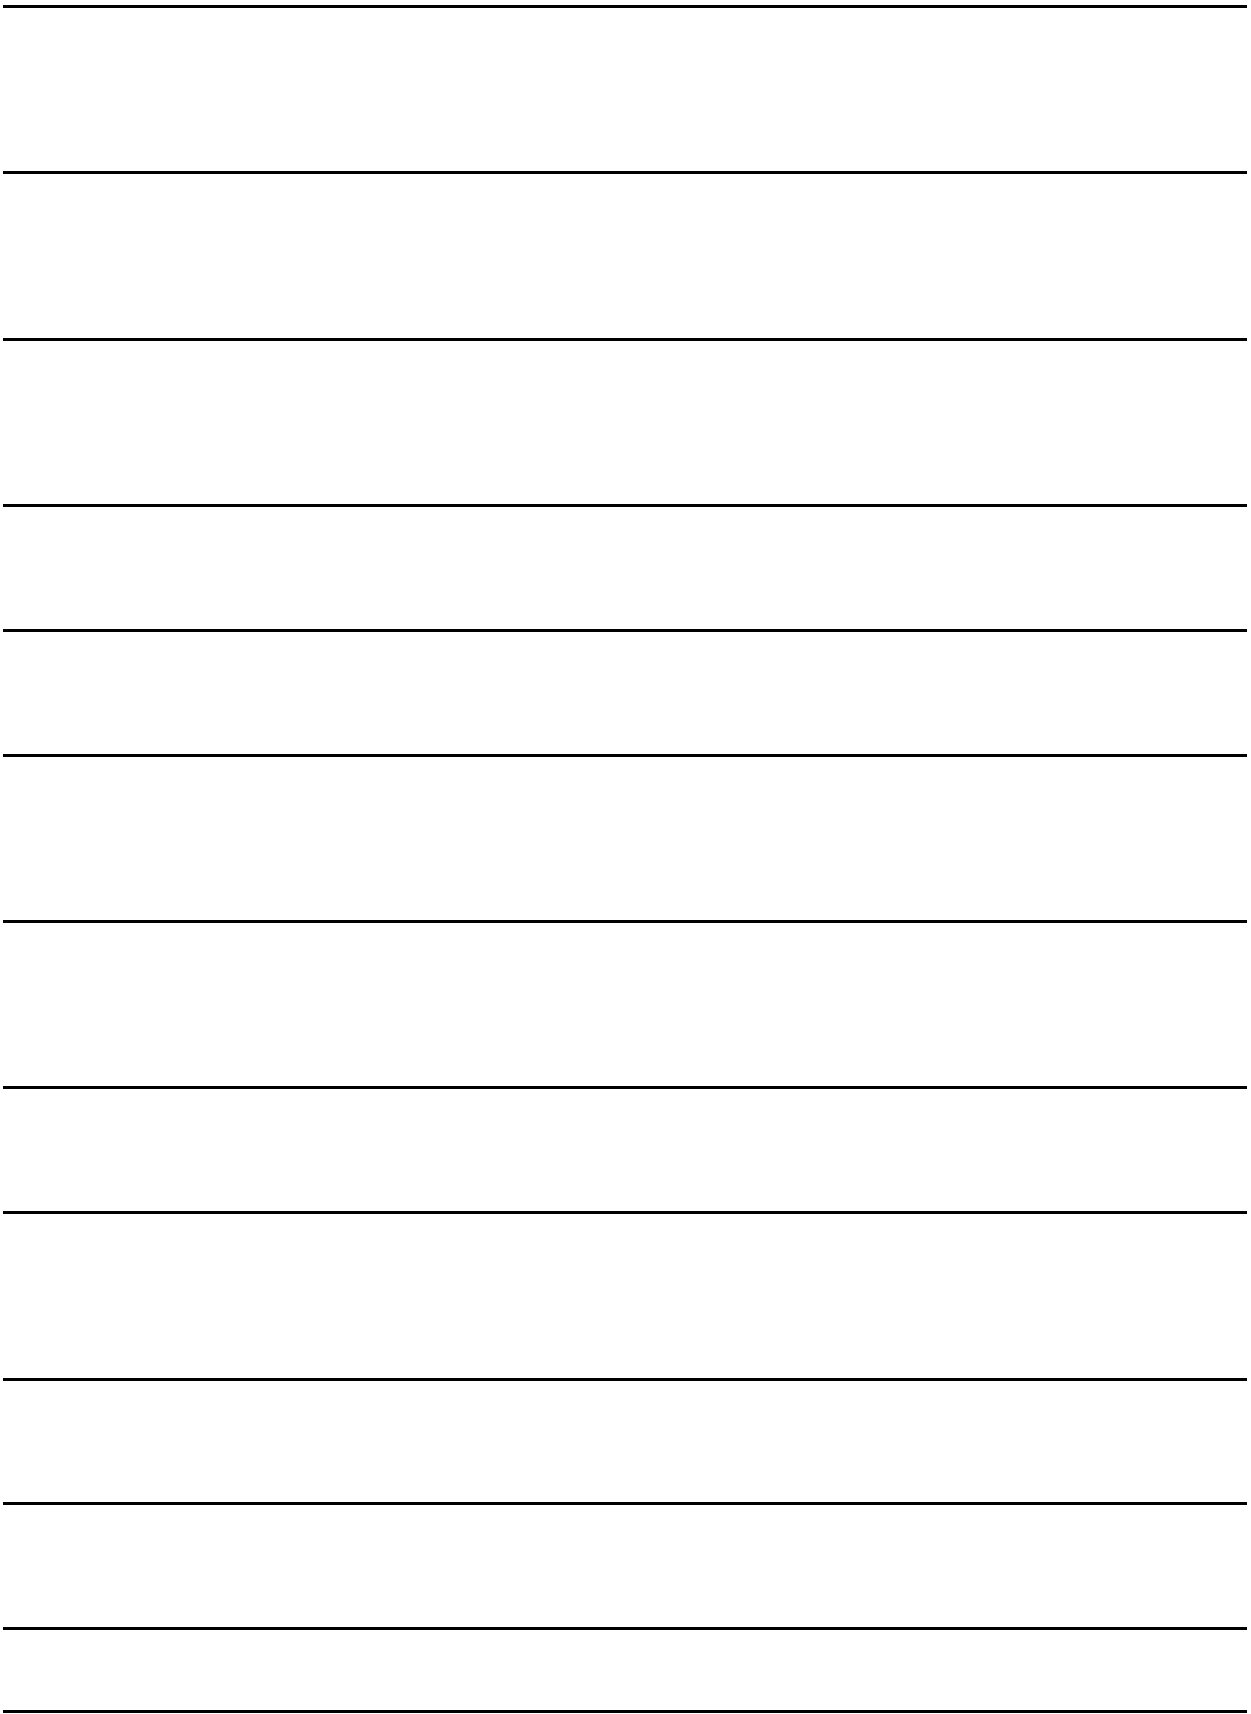

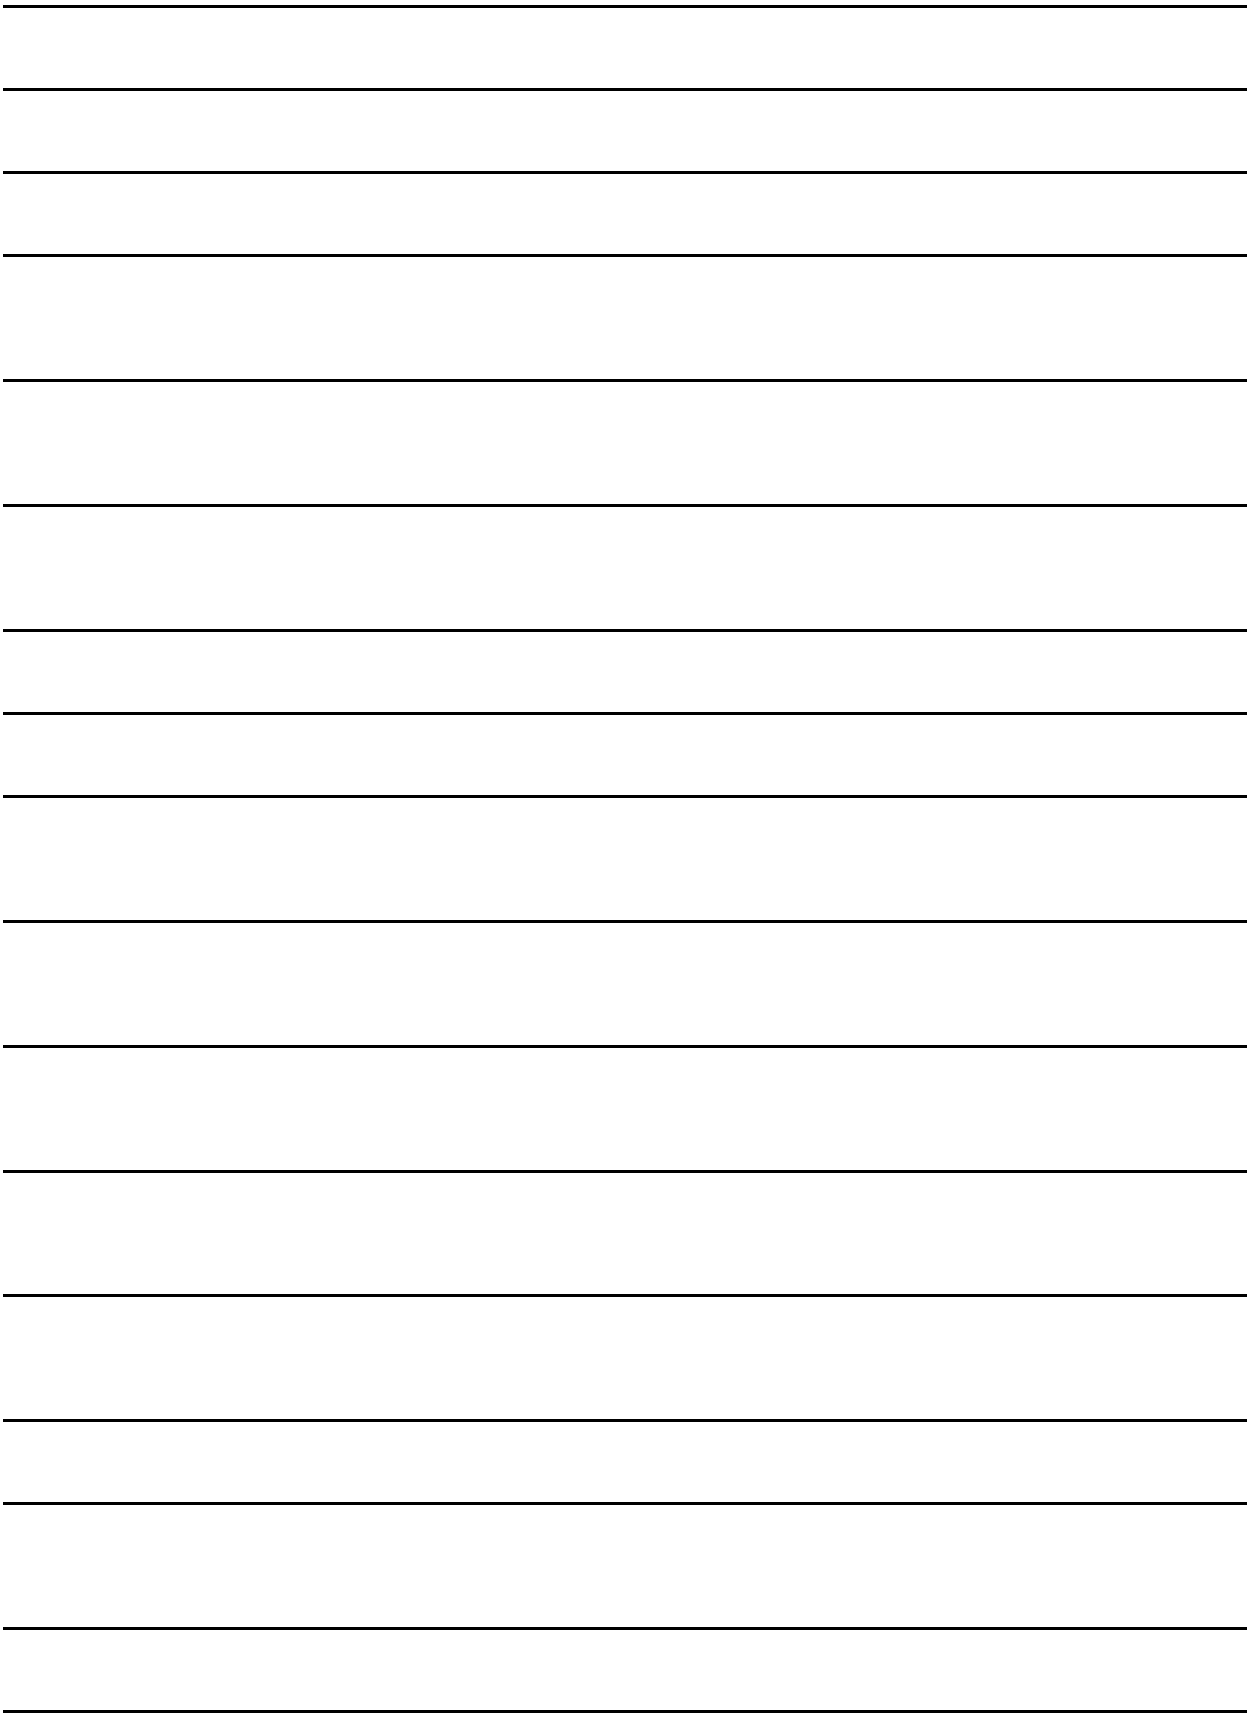

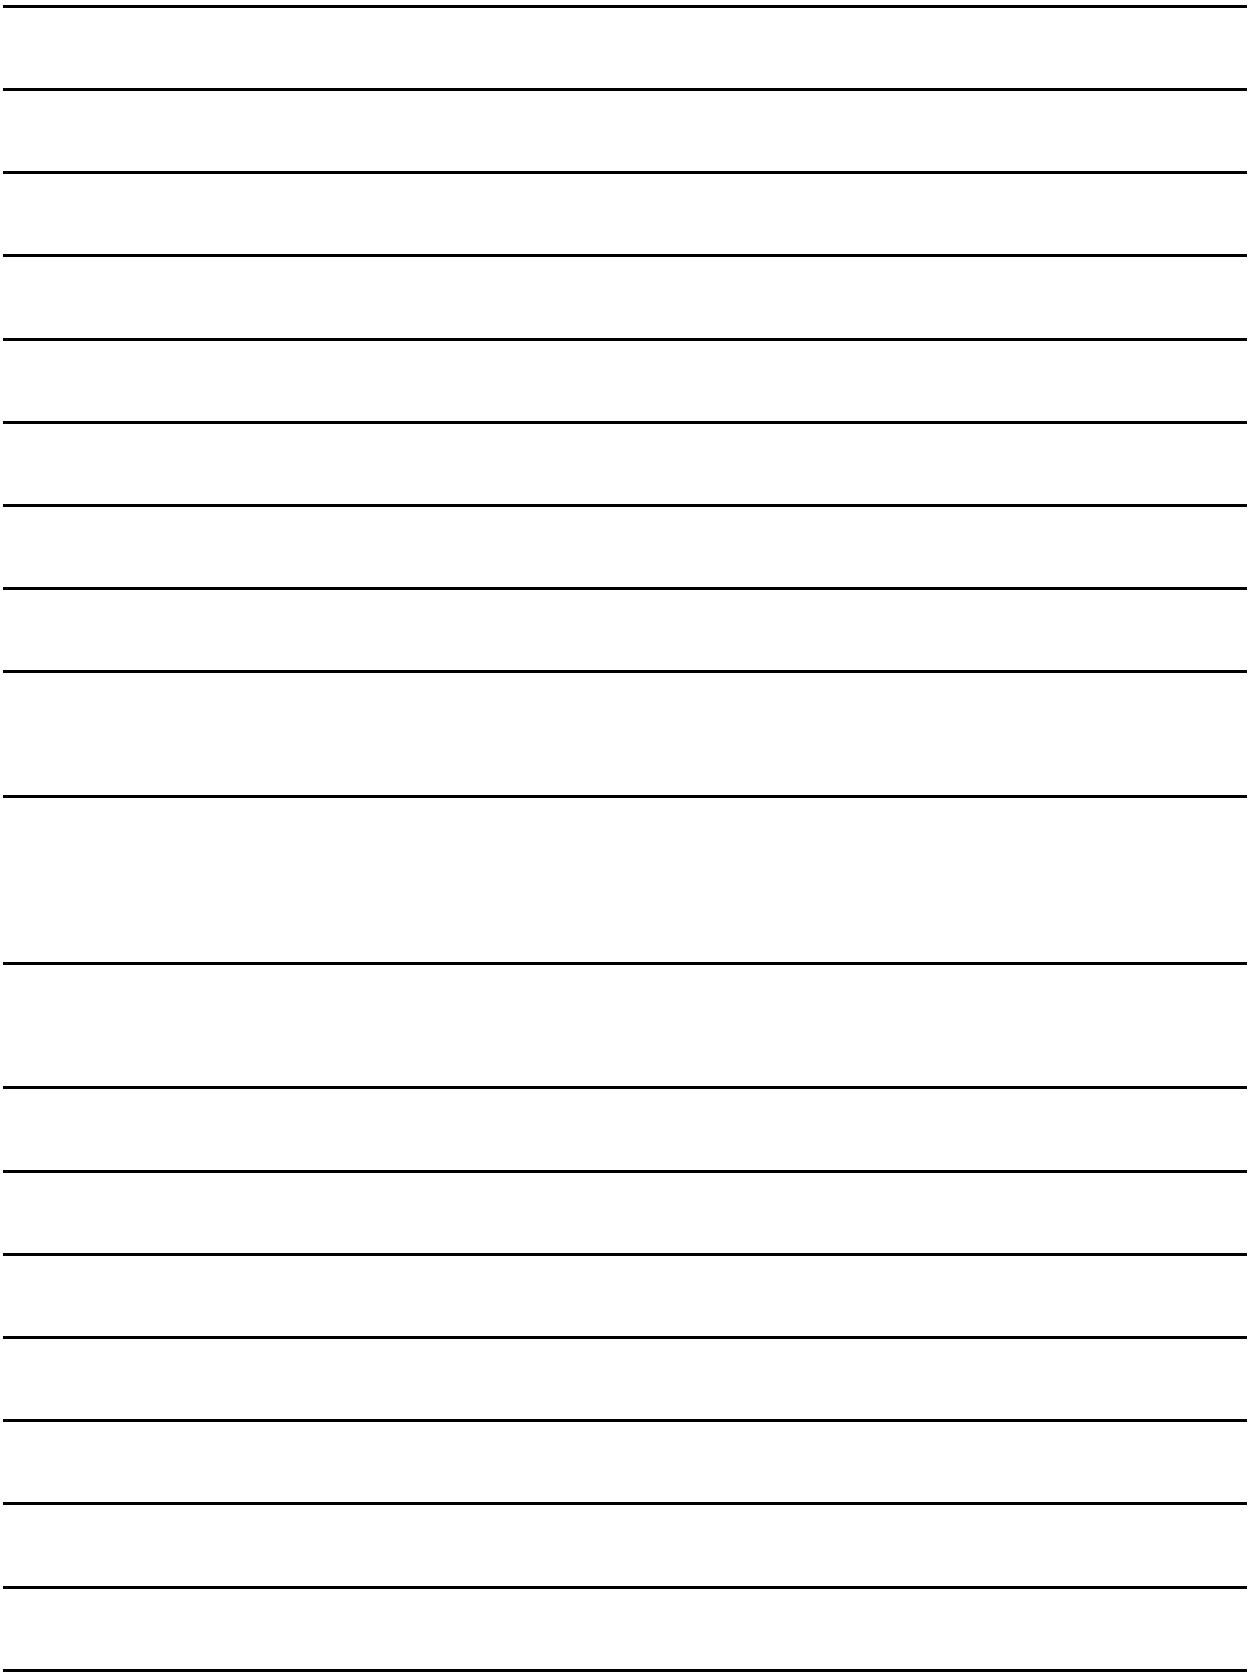



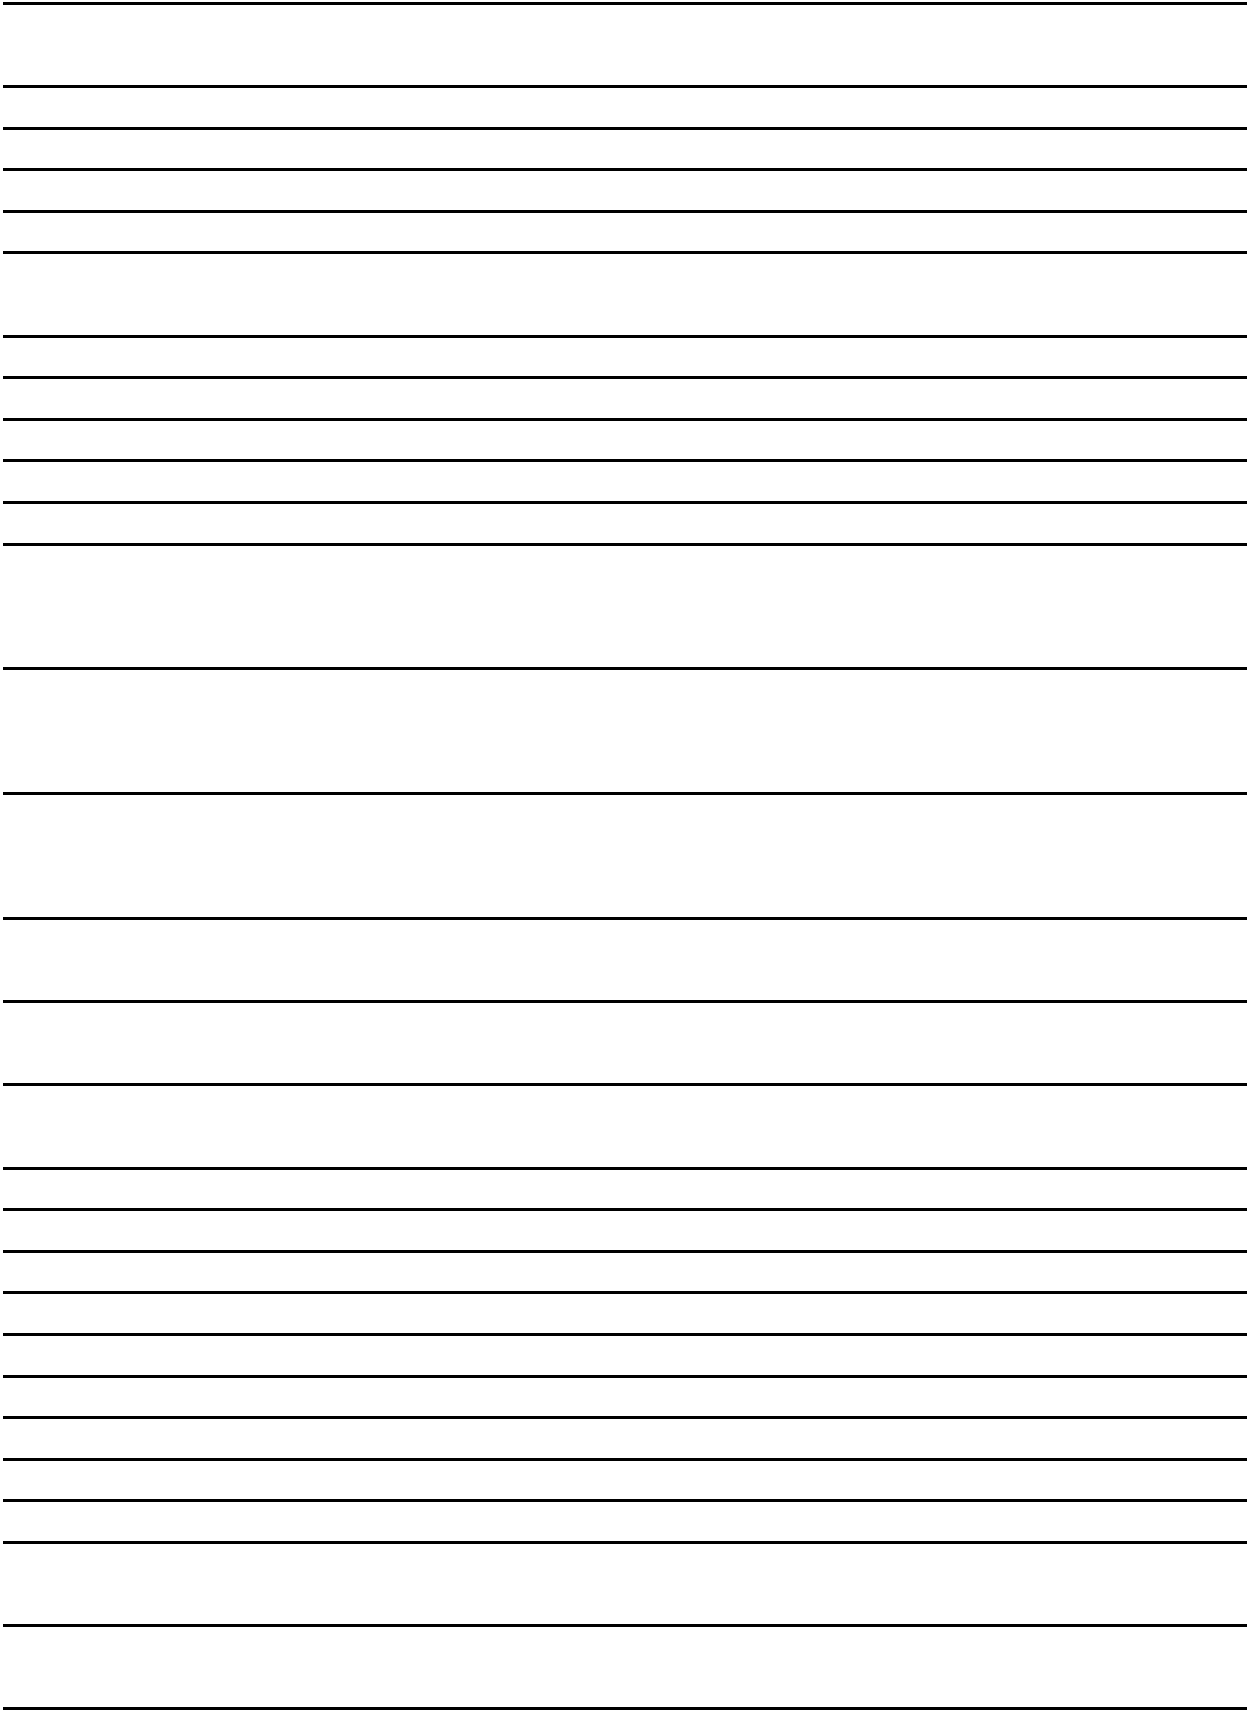

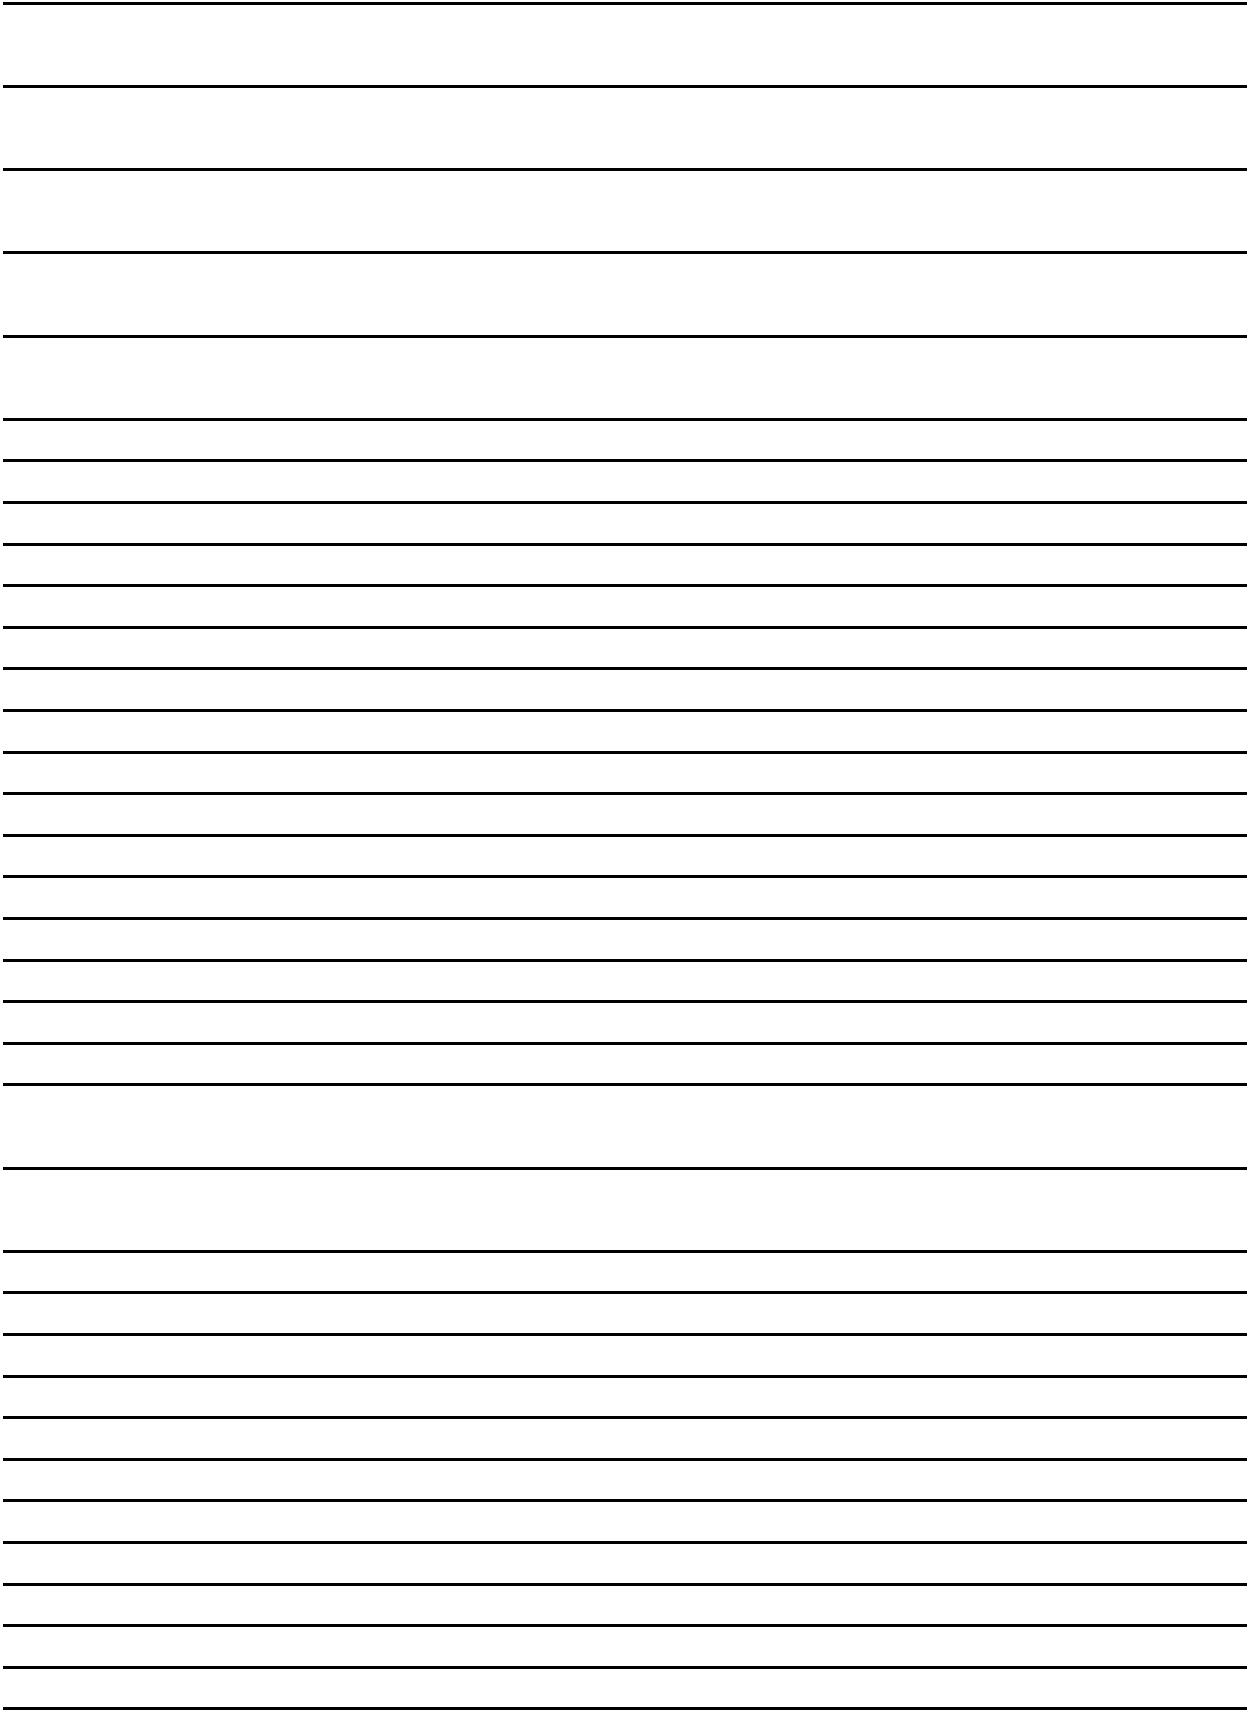

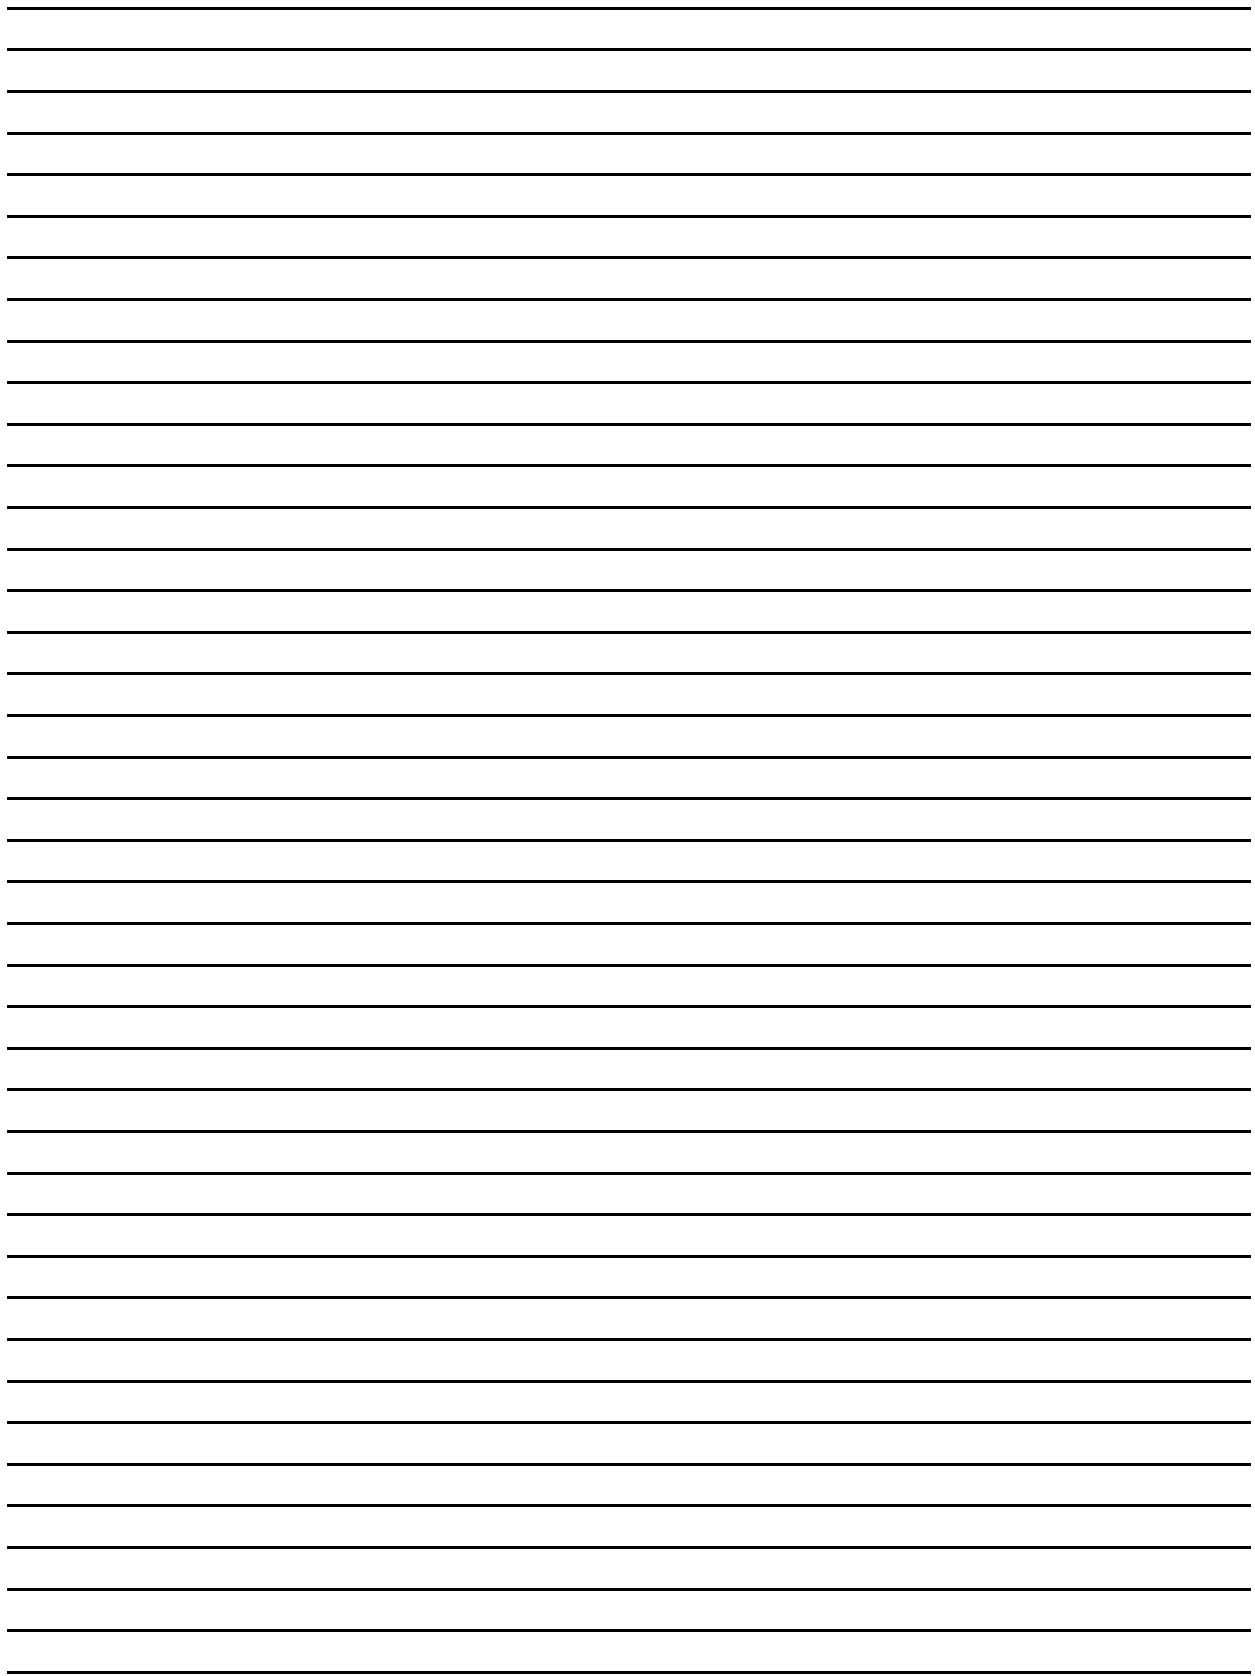

---

---

---

---

---

---

---

---

---

---

---

---

---

---

---

---

---

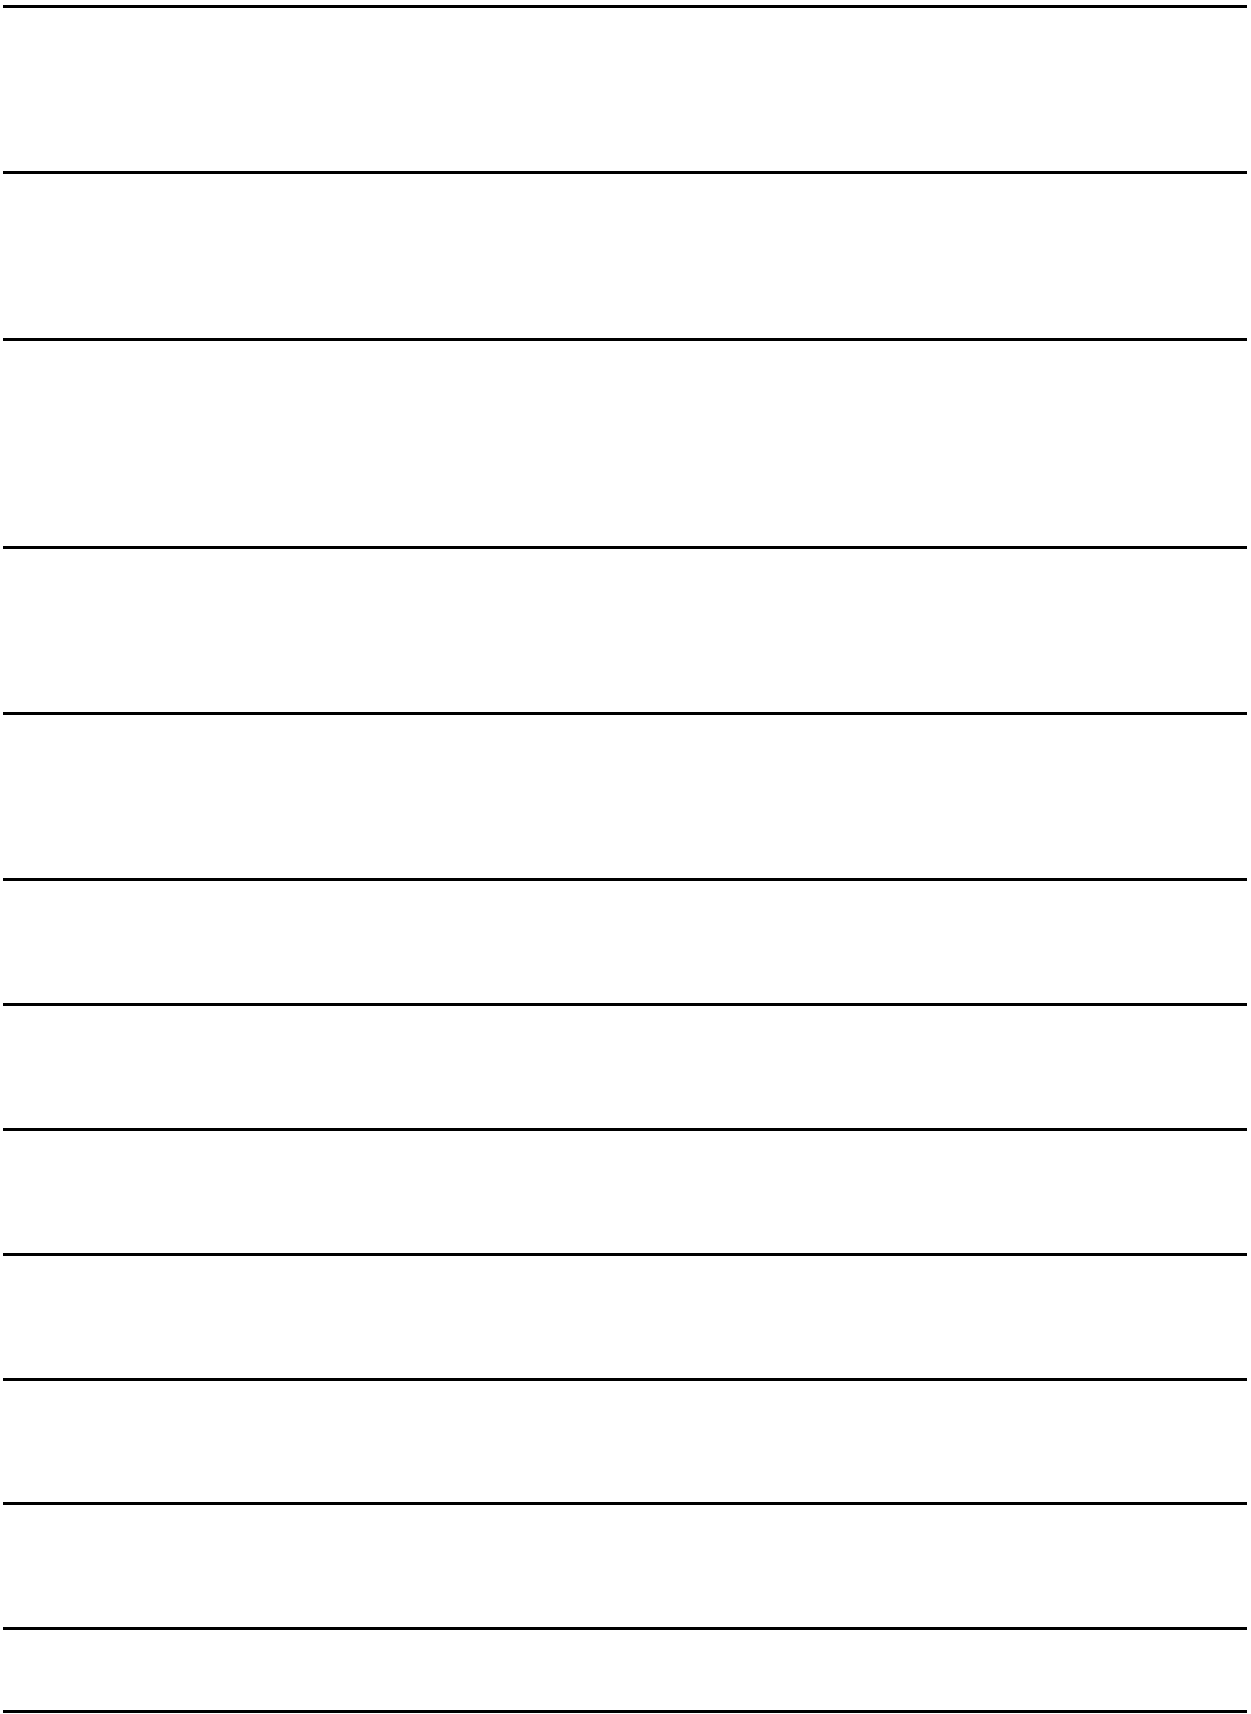

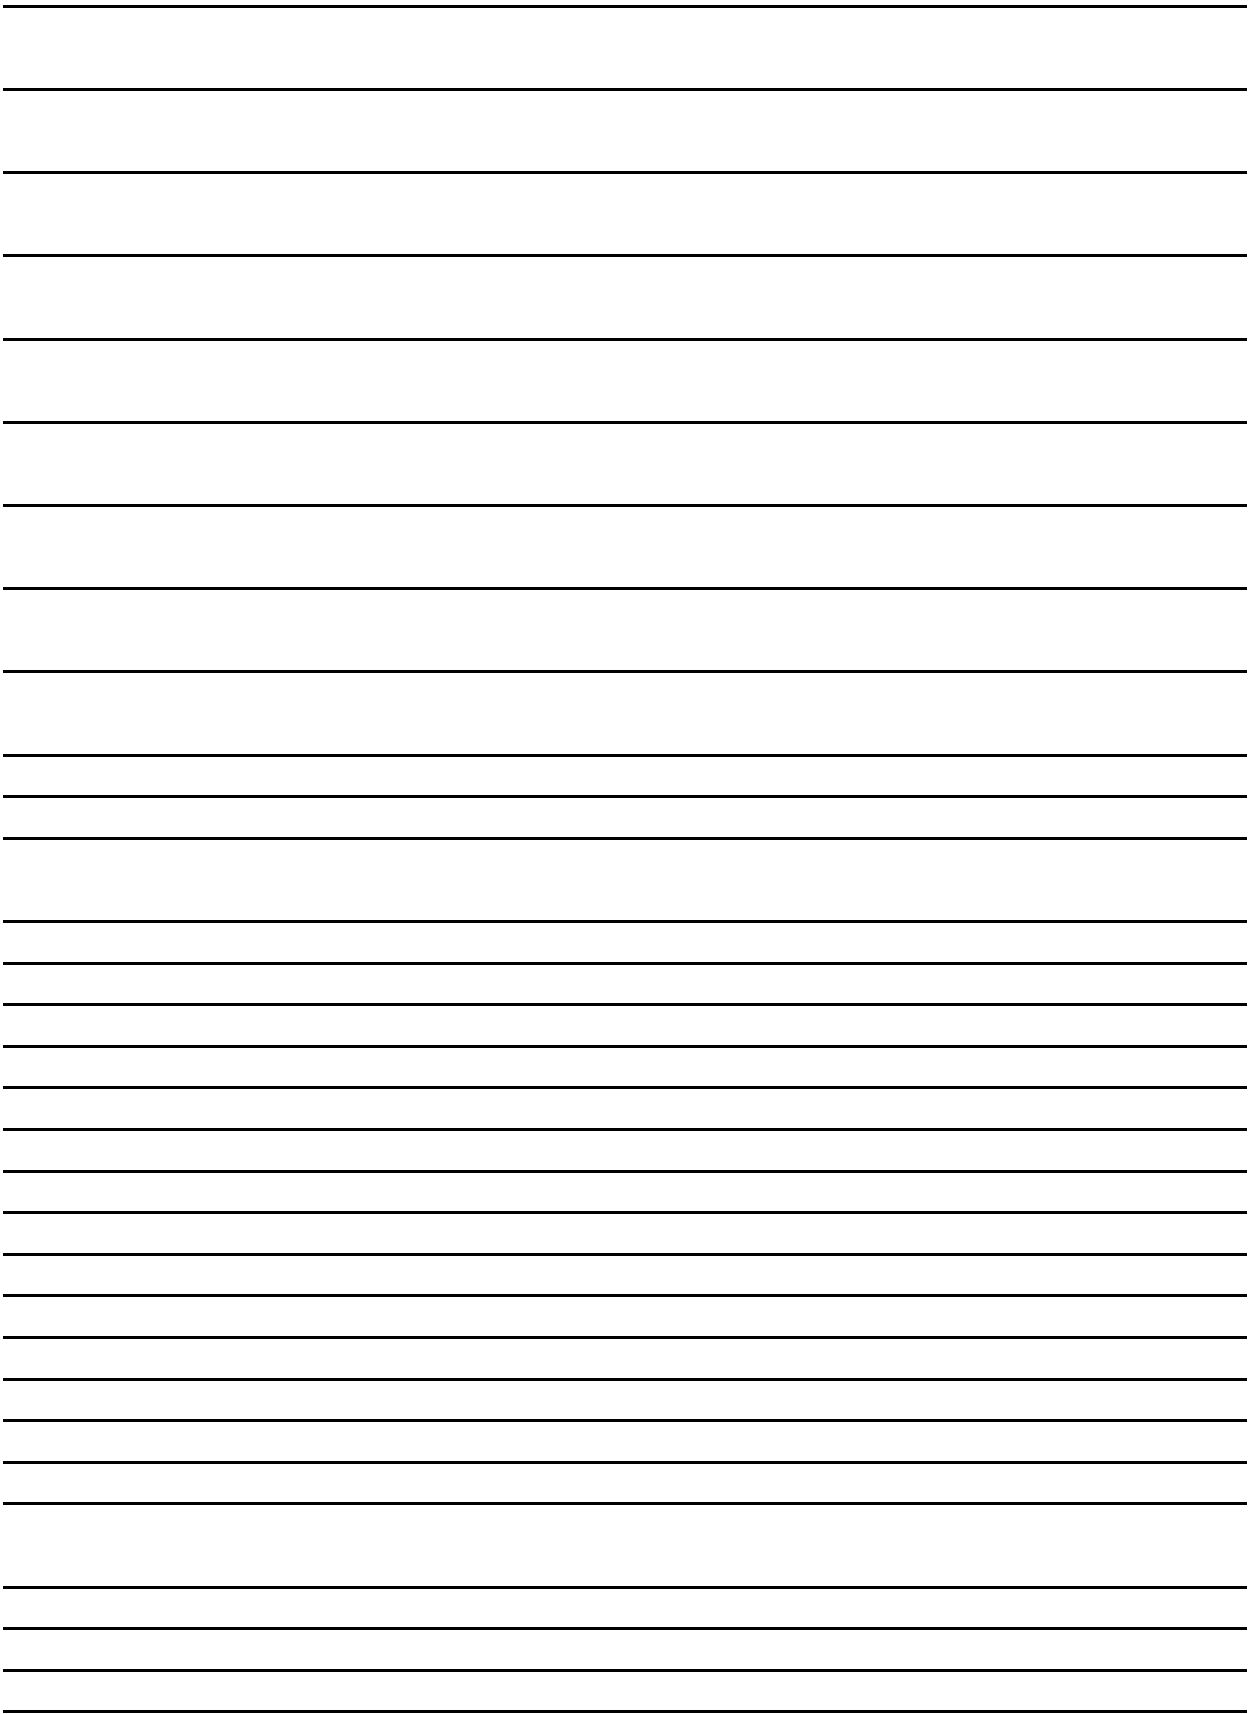

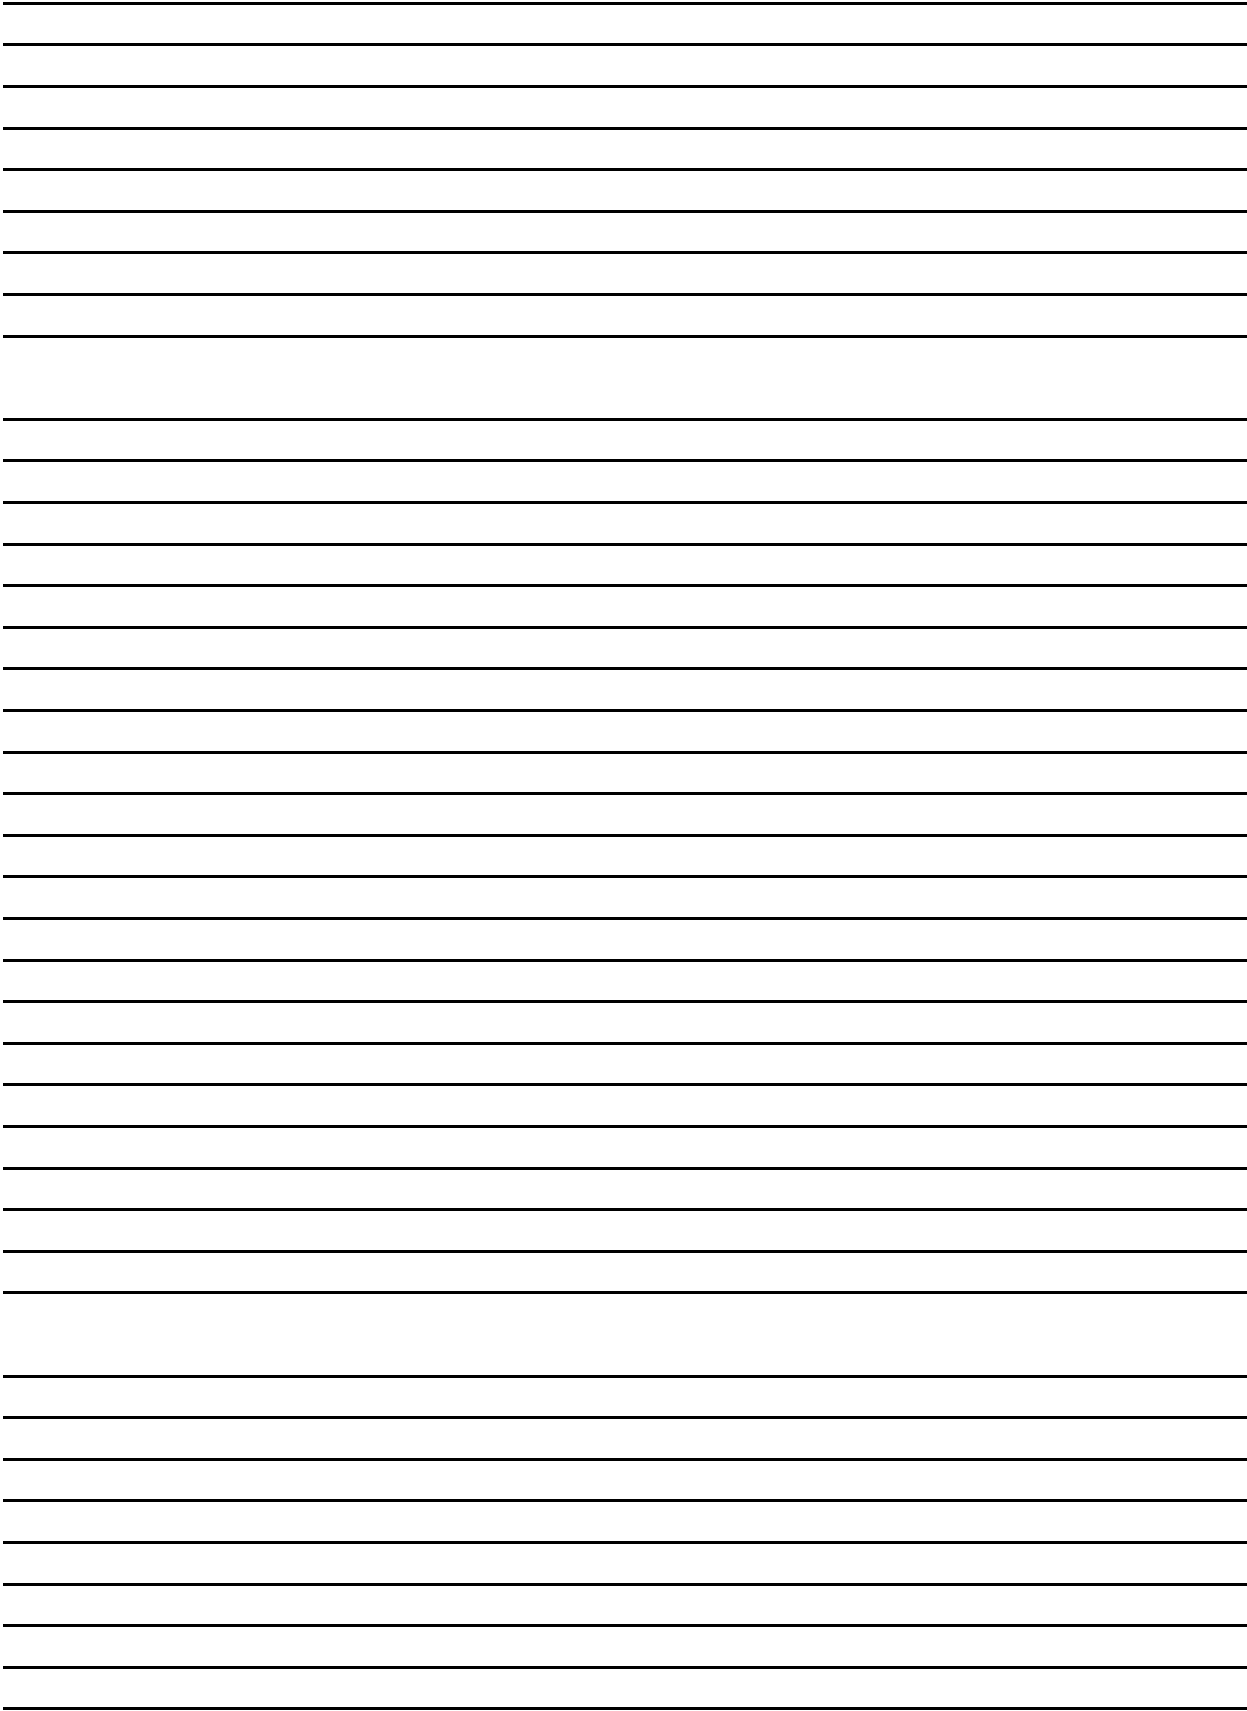

Blank writing area with 18 horizontal lines.

Blank writing area with 1 horizontal line.

Blank writing area with 10 horizontal lines.







---

---

---

---

---

---

---

---

---

---

---

---

---

---

---

---

---

---















---

---

---

---

---

---

---

---

---

---

---

---

---

---

---

---

---







Blank writing area with 18 horizontal lines.

Blank writing area with 1 horizontal line.

Blank writing area with 10 horizontal lines.







---

---

---

---

---

---

---

---

---

---

---

---

---

---

---

---

---

---













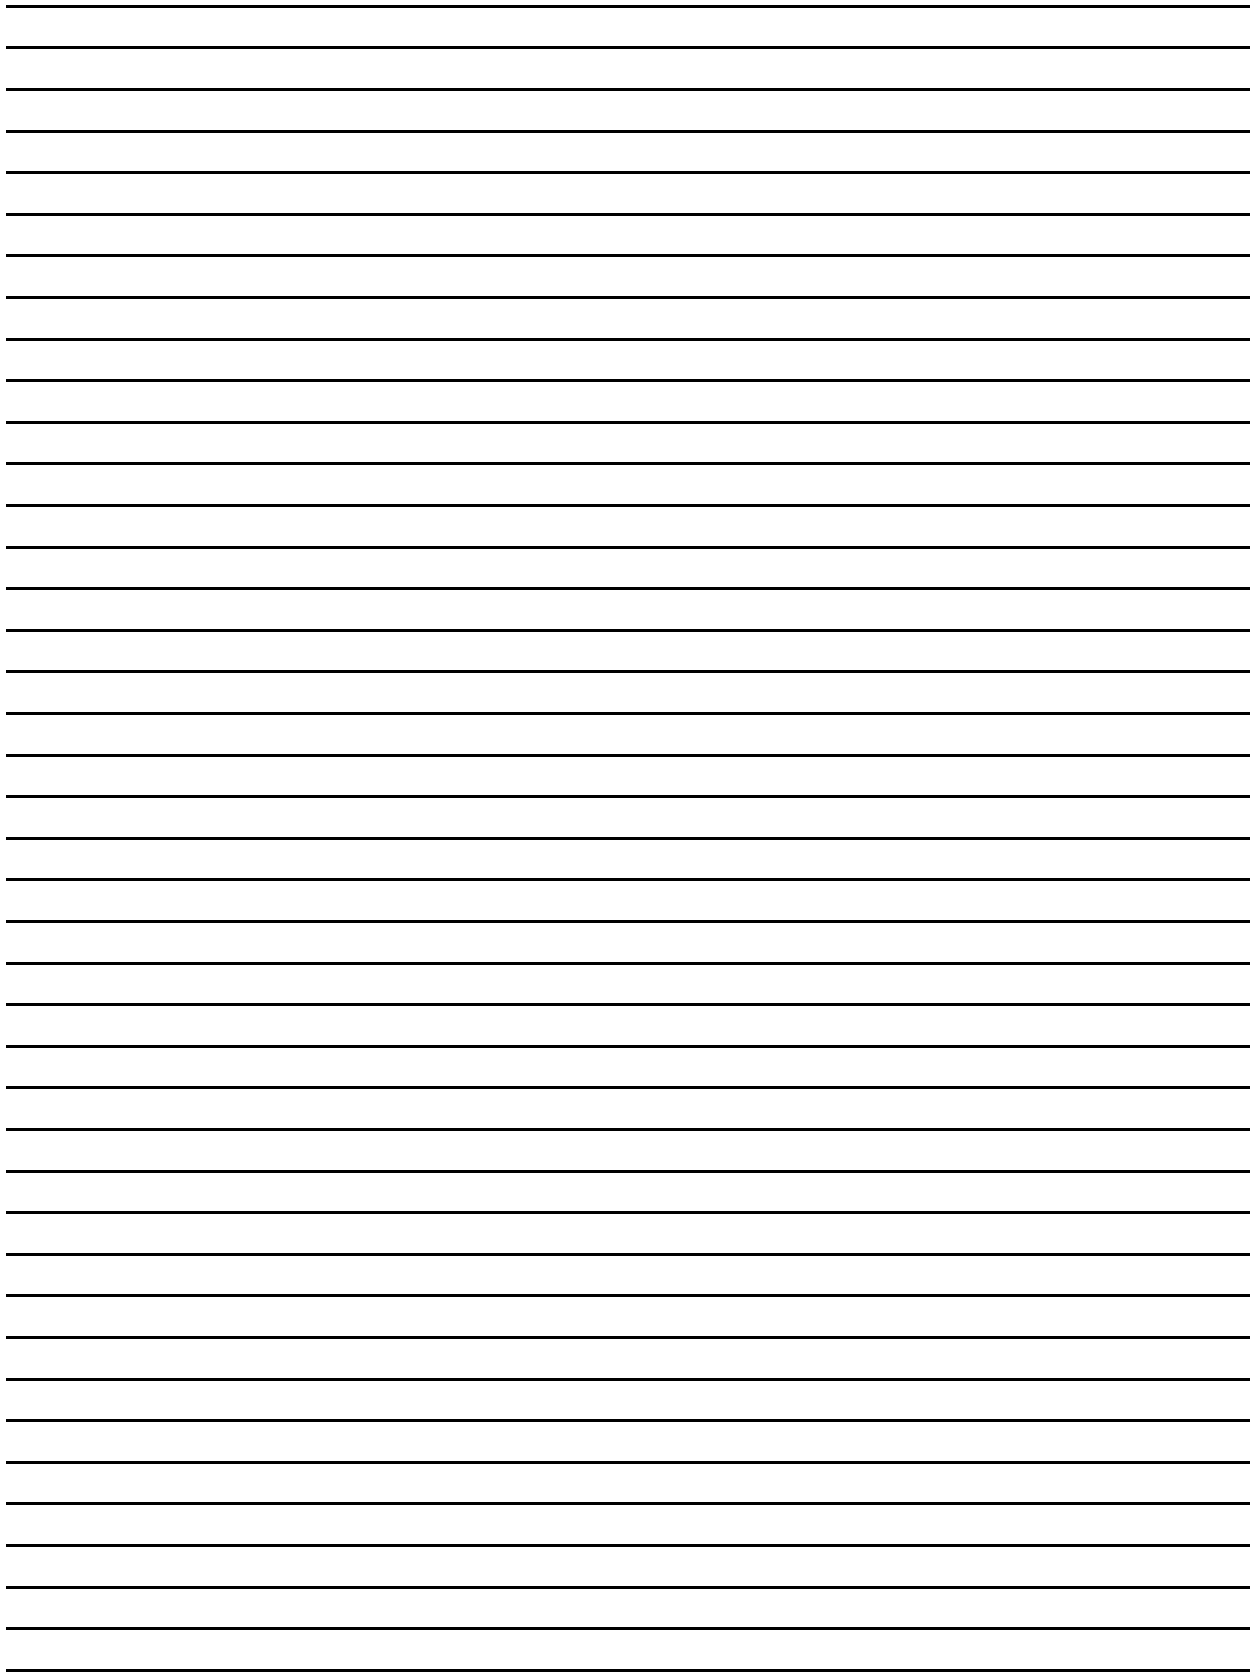

---

---

---

---

---

---

---

---

---

---

---

---

---

---

---

---

---

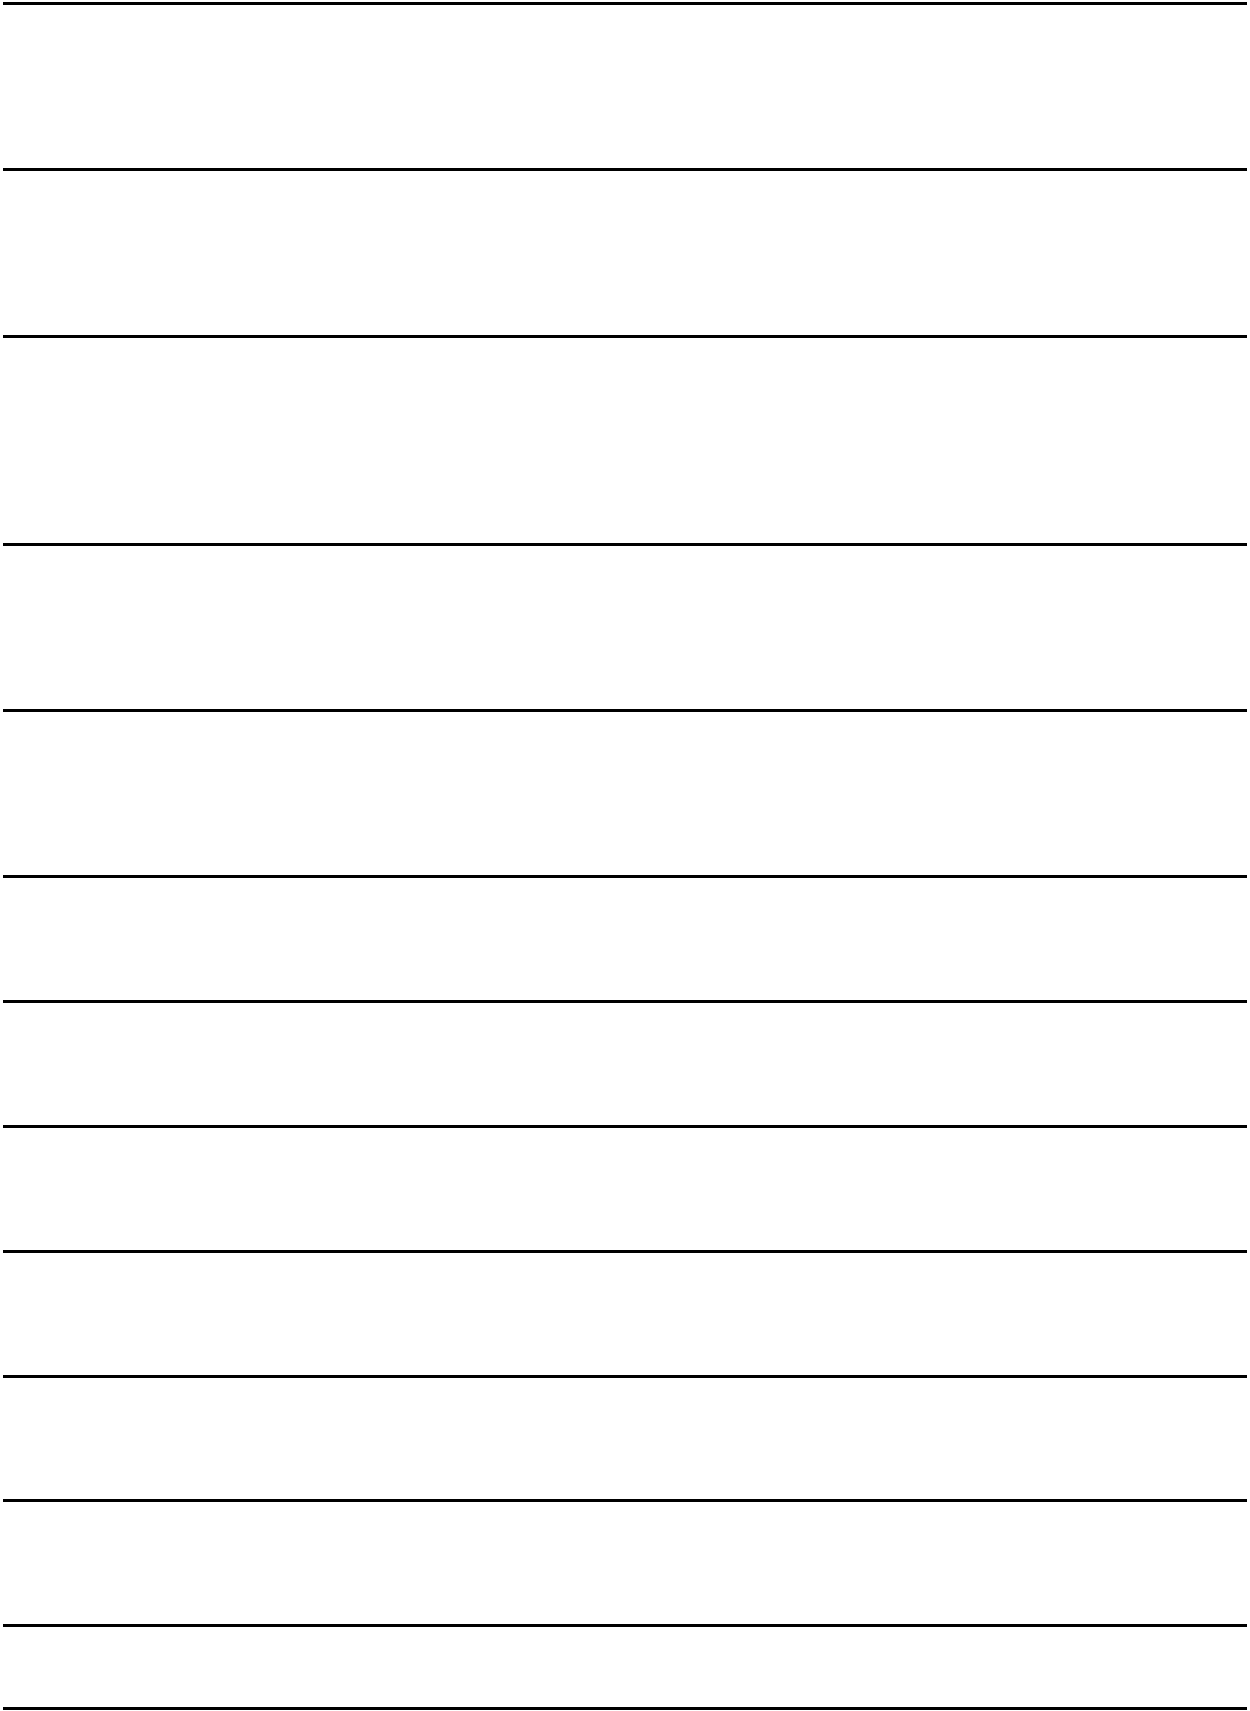



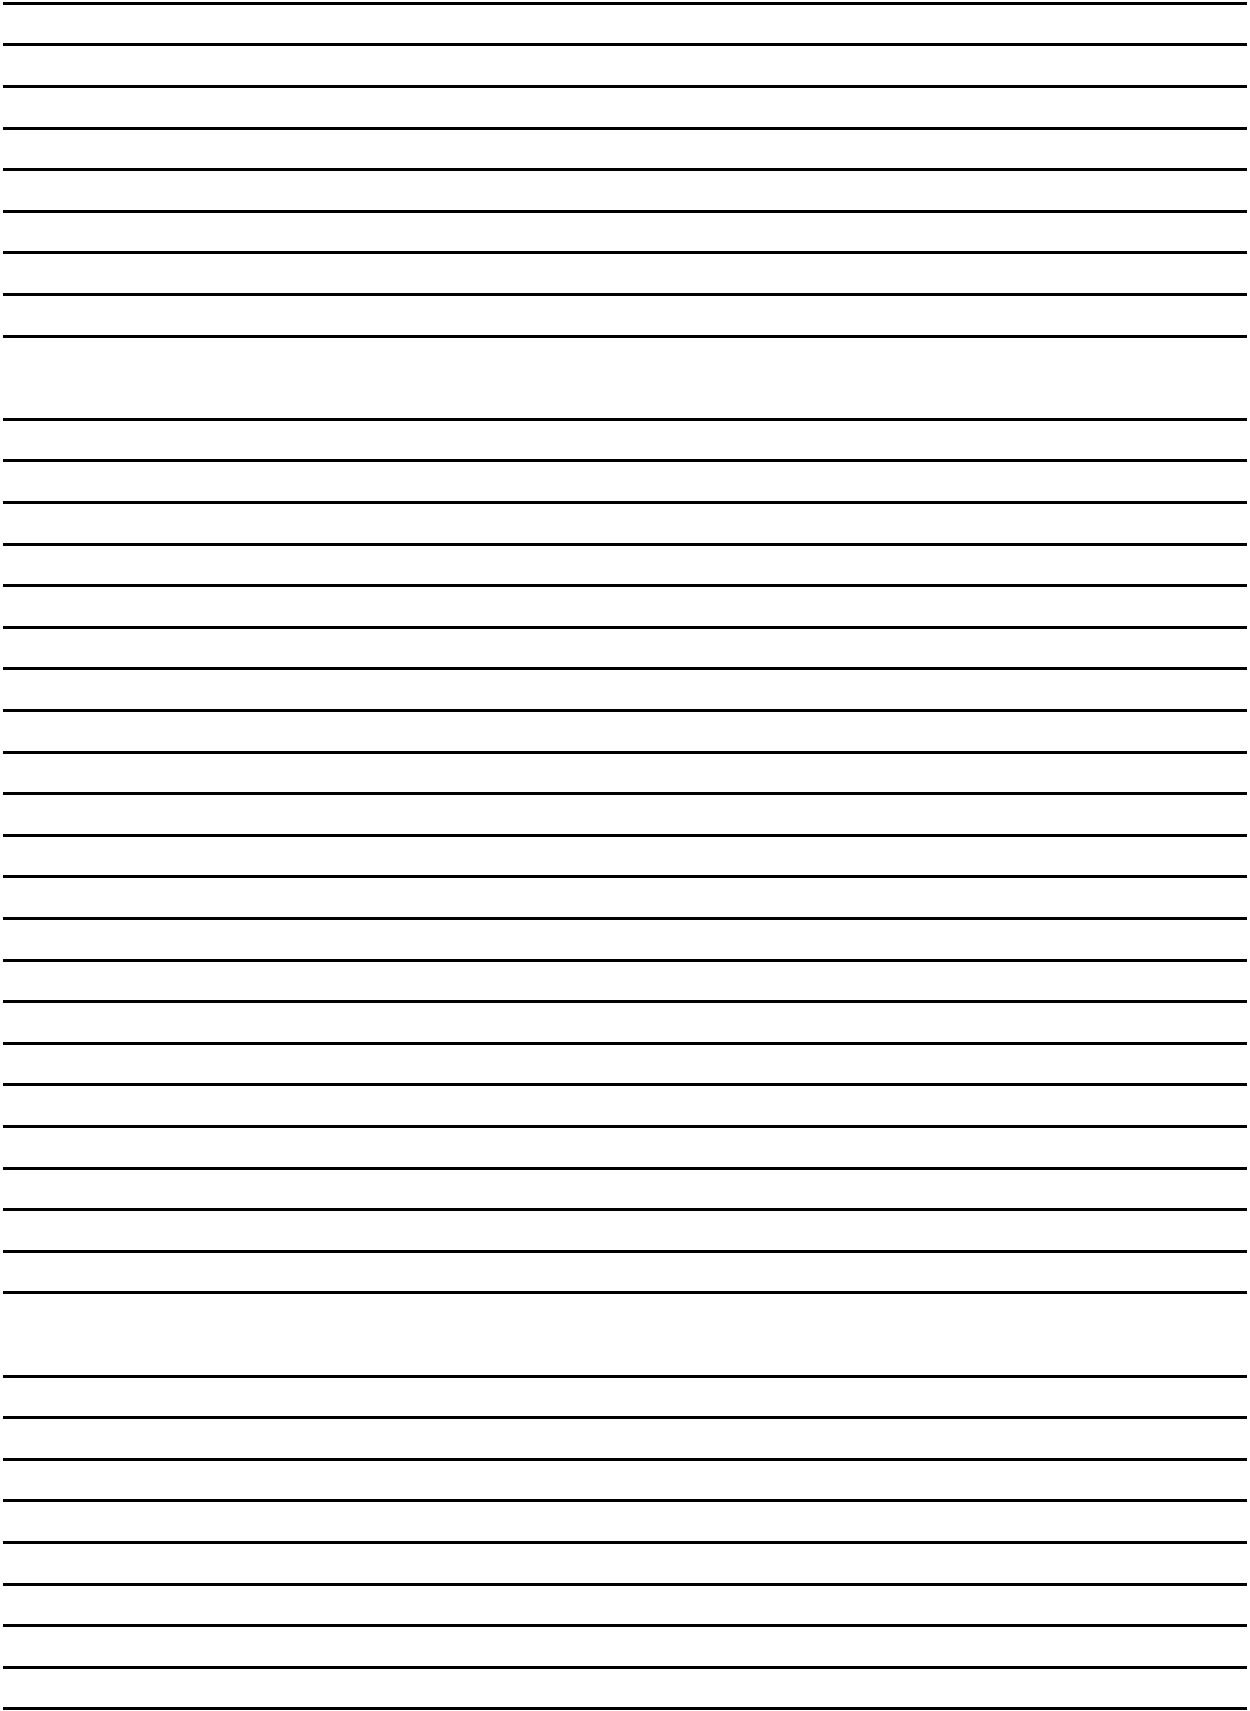

Blank writing area with 18 horizontal lines.

Blank writing area with 1 horizontal line.

Blank writing area with 10 horizontal lines.







---

---

---

---

---

---

---

---

---

---

---

---

---

---

---

---

---

---















---

---

---

---

---

---

---

---

---

---

---

---

---

---

---

---

---

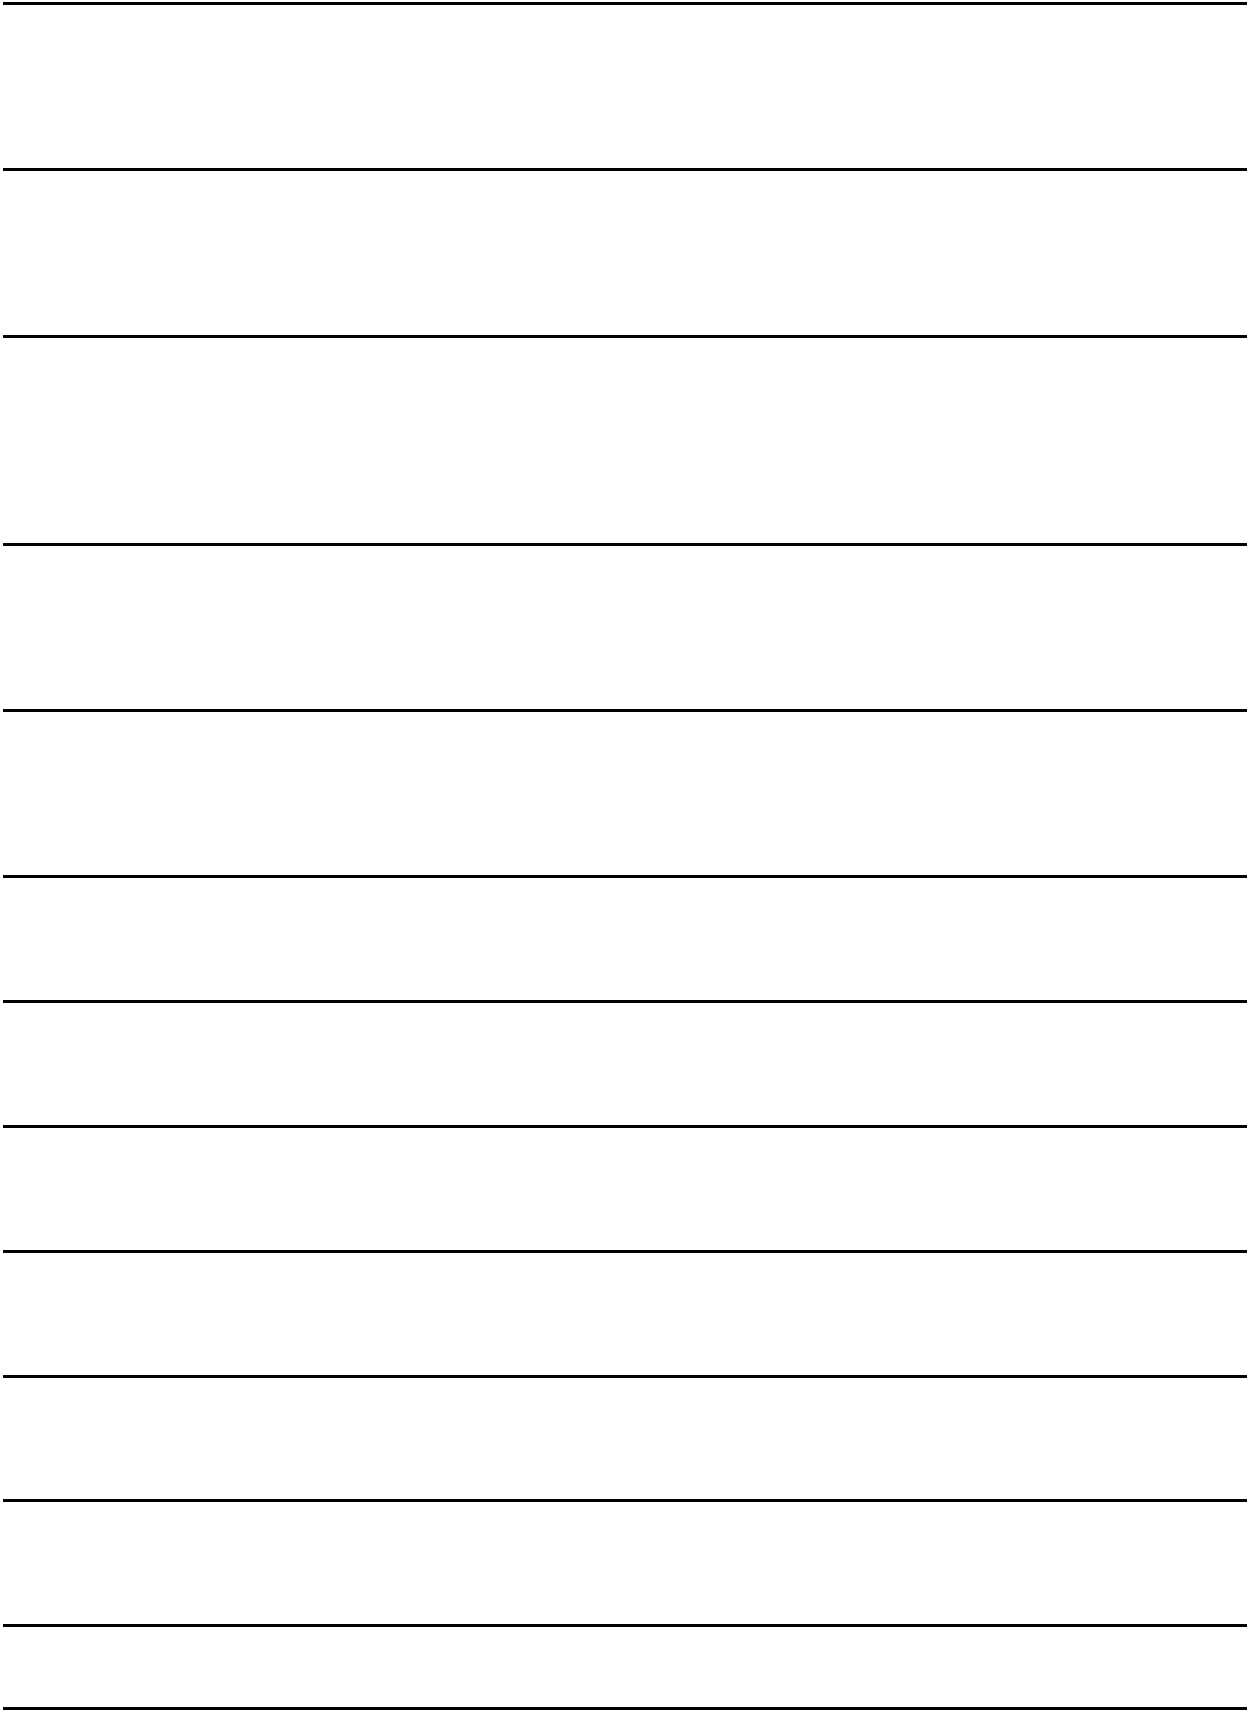





Blank writing area with 18 horizontal lines.

Blank writing area with 1 horizontal line.

Blank writing area with 10 horizontal lines.





---

---

---

---

---

---

---

---

---



---

---

---

---

---

---

---

---

---













---

---

---

---

---

---

---

---

---

---

---

---

---

---

---

---

---









Blank writing area with 18 horizontal lines.

Blank writing area with 1 horizontal line.

Blank writing area with 10 horizontal lines.





---

---

---

---

---

---

---

---

---

---

---

---

---

---

---

---

---

---















---

---

---

---

---

---

---

---

---

---

---

---

---

---

---

---

---









Blank writing area with 18 horizontal lines.

Blank writing area with 1 horizontal line.

Blank writing area with 10 horizontal lines.





---

---

---

---

---

---

---

---

---

---

---

---

---

---

---

---

---

---









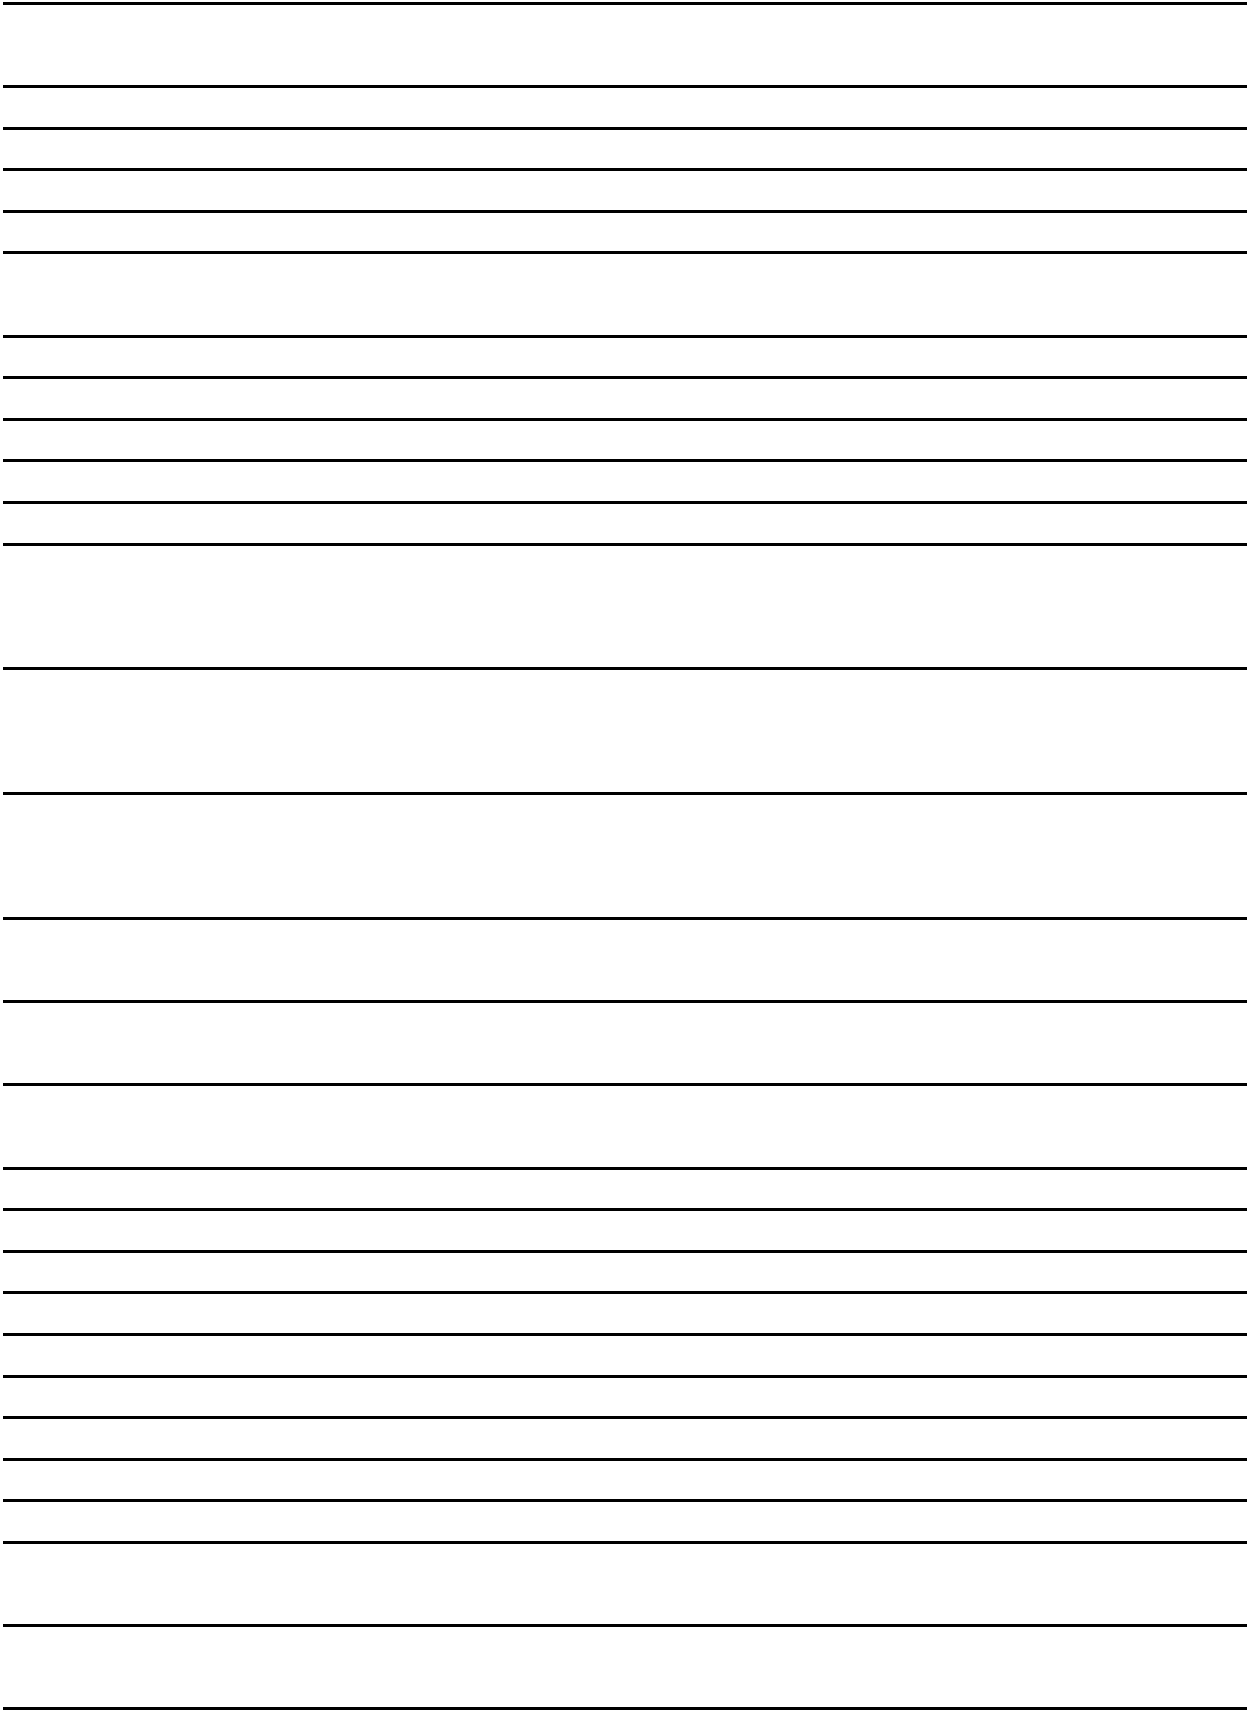





---

---

---

---

---

---

---

---

---

---

---

---

---

---

---

---

---









Blank writing area with 18 horizontal lines.

Blank writing area with 1 horizontal line.

Blank writing area with 10 horizontal lines.





---

---

---

---

---

---

---

---

---

---

---

---

---

---

---

---

---

---









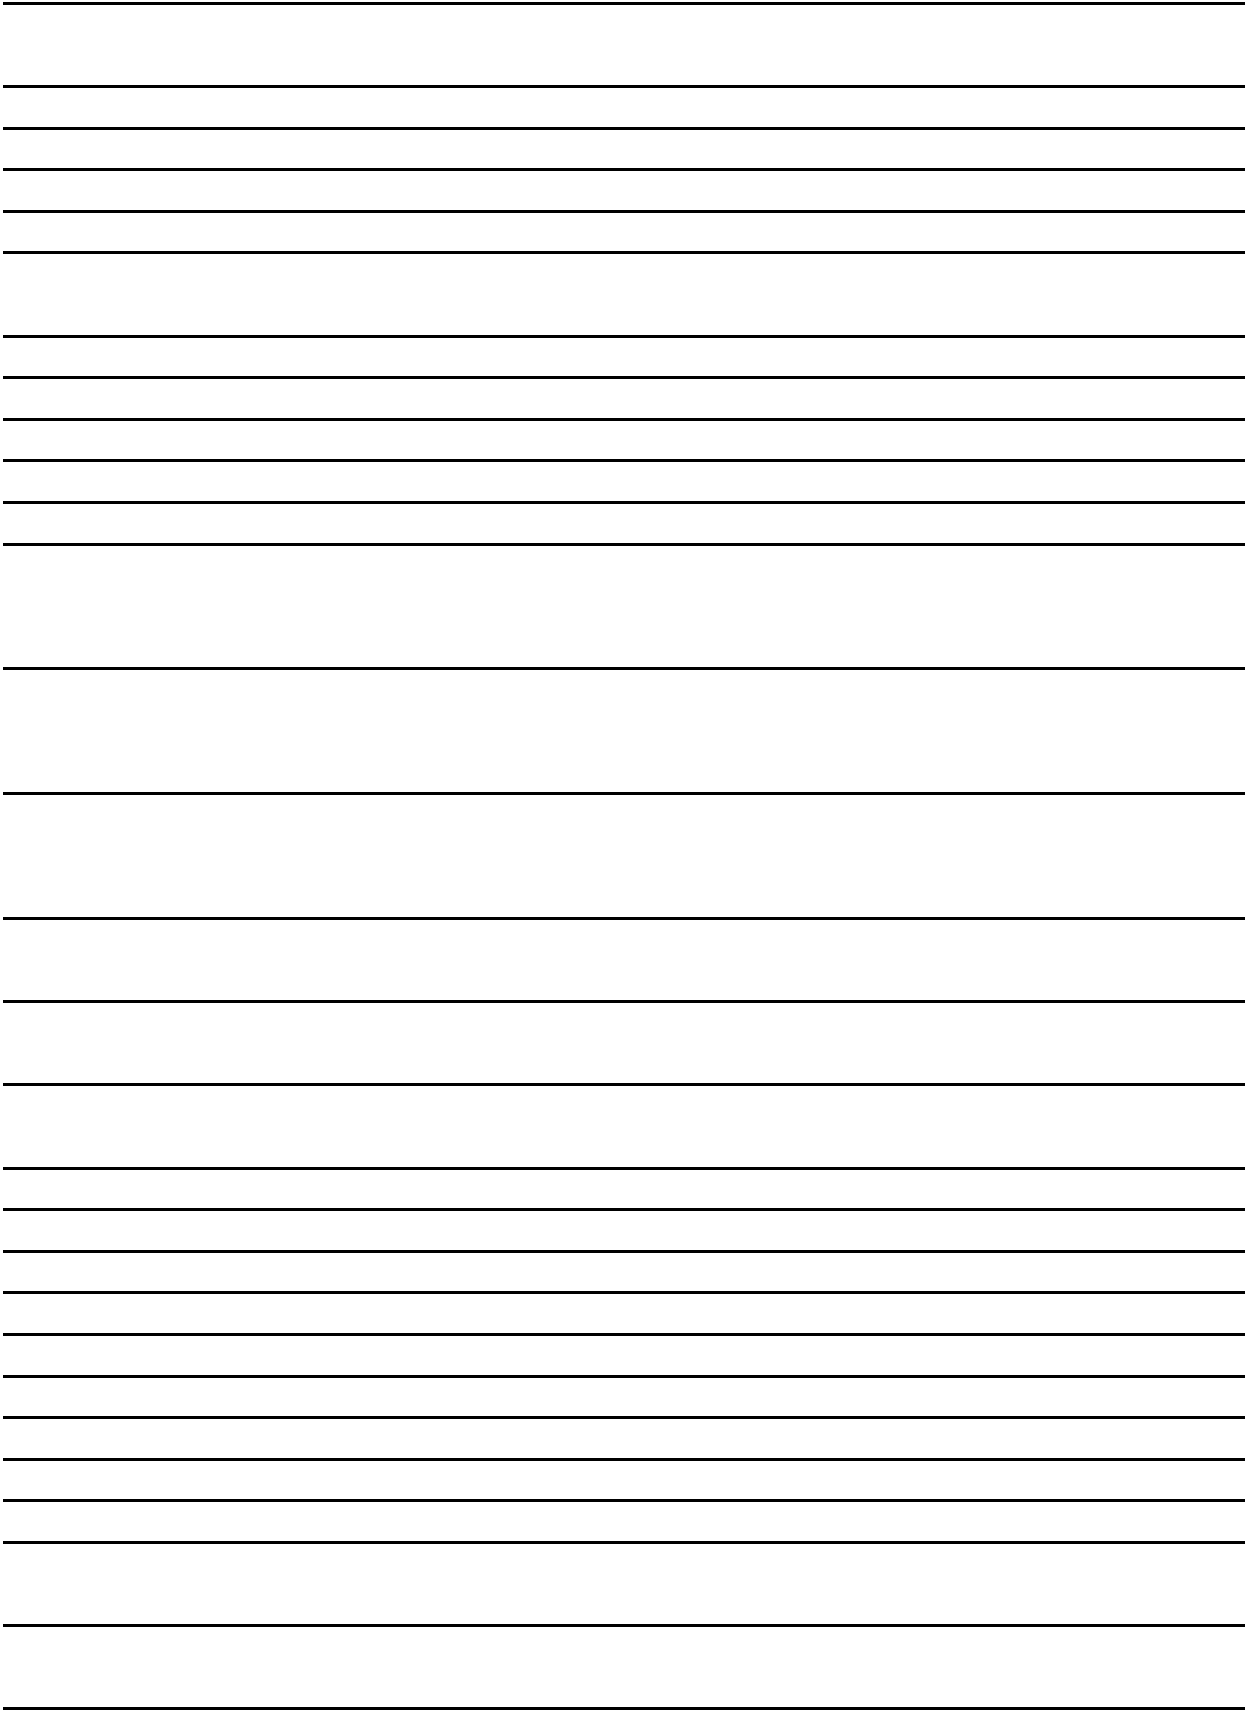





---

---

---

---

---

---

---

---

---

---

---

---

---

---

---

---

---









Blank writing area with 18 horizontal lines.

Blank writing area with 1 horizontal line.

Blank writing area with 10 horizontal lines.





---

---

---

---

---

---

---

---

---

---

---

---

---

---

---

---

---

---















---

---

---

---

---

---

---

---

---

---

---

---

---

---

---

---

---







Blank writing area with 18 horizontal lines.

Blank writing area with 1 horizontal line.

Blank writing area with 10 horizontal lines.







---

---

---

---

---

---

---

---

---

---

---

---

---

---

---

---

---

---















---

---

---

---

---

---

---

---

---

---

---

---

---

---

---

---

---







Blank writing area with 18 horizontal lines.

Blank writing area with 1 horizontal line.

Blank writing area with 10 horizontal lines.







---

---

---

---

---

---

---

---

---

---

---

---

---

---

---

---

---

---















---

---

---

---

---

---

---

---

---

---

---

---

---

---

---

---

---







Blank writing area with 18 horizontal lines.

Blank writing area with 1 horizontal line.

Blank writing area with 10 horizontal lines.







---

---

---

---

---

---

---

---

---

---

---

---

---

---

---

---

---

---















---

---

---

---

---

---

---

---

---

---

---

---

---

---

---

---

---







Blank writing area with 18 horizontal lines.

Blank writing area with 1 horizontal line.

Blank writing area with 10 horizontal lines.





---

---

---

---

---

---

---

---

---



---

---

---

---

---

---

---

---

---













---

---

---

---

---

---

---

---

---

---

---

---

---

---

---

---

---







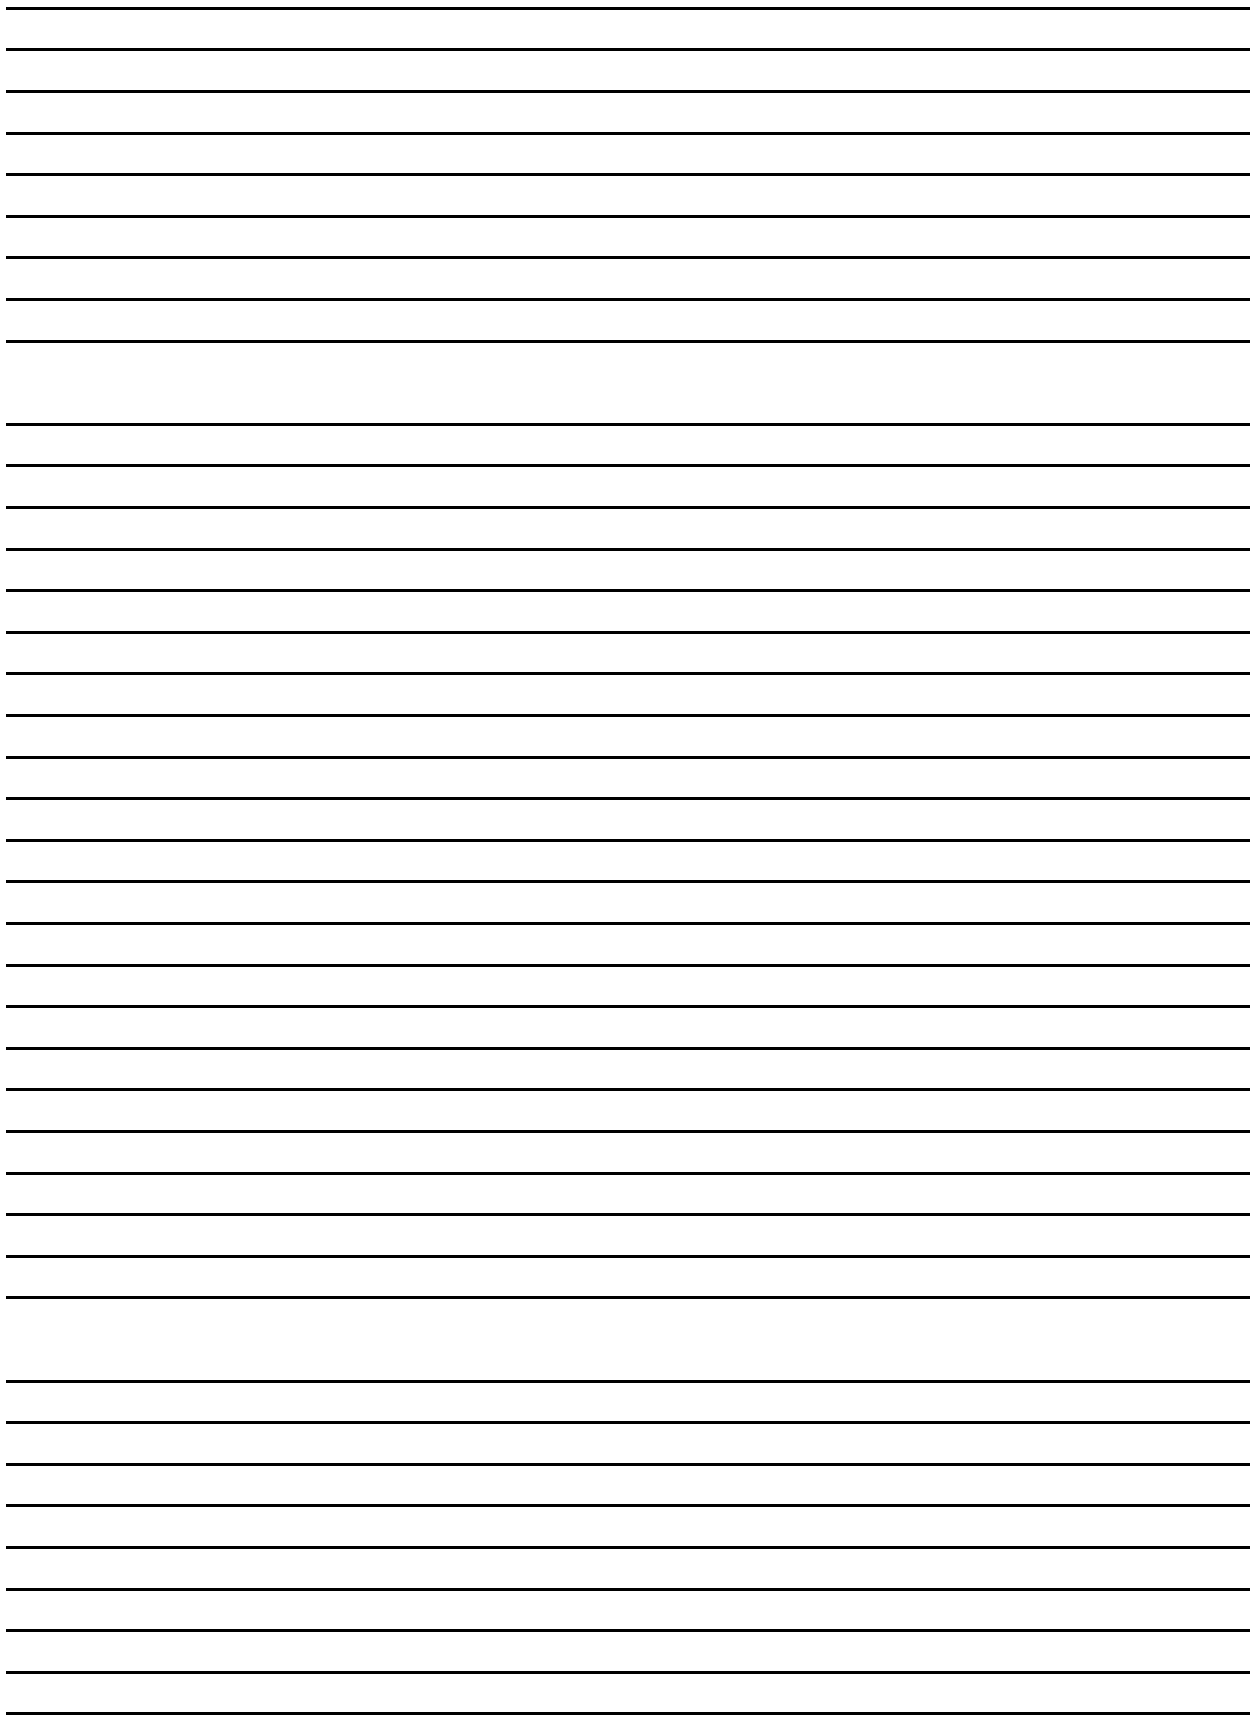







---

---

---

---

---

---

---

---

---

---

---

---

---

---

---

---

---

---















---

---

---

---

---

---

---

---

---

---

---

---

---

---

---

---

---









Blank writing area with 18 horizontal lines.

Blank writing area with 1 horizontal line.

Blank writing area with 10 horizontal lines.





---

---

---

---

---

---

---

---

---

---

---

---

---

---

---

---

---

---















---

---

---

---

---

---

---

---

---

---

---

---

---

---

---

---

---









Blank writing area with 18 horizontal lines.

Blank writing area with 1 horizontal line.

Blank writing area with 10 horizontal lines.





---

---

---

---

---

---

---

---

---

---

---

---

---

---

---

---

---

---















---

---

---

---

---

---

---

---

---

---

---

---

---

---

---

---

---















---

---

---

---

---

---

---

---

---

---

---

---

---

---

---

---

---

---















---

---

---

---

---

---

---

---

---

---

---

---

---

---

---

---

---















---

---

---

---

---

---

---

---

---

---

---

---

---

---

---

---

---

---















---

---

---

---

---

---

---

---

---

---

---

---

---

---

---

---

---







Blank writing area with 18 horizontal lines.

Blank writing area with 1 horizontal line.

Blank writing area with 10 horizontal lines.







---

---

---

---

---

---

---

---

---

---

---

---

---

---

---

---

---

---















---

---

---

---

---

---

---

---

---

---

---

---

---

---

---

---

---







Blank writing area with 18 horizontal lines.

Blank writing area with 1 horizontal line.

Blank writing area with 10 horizontal lines.







---

---

---

---

---

---

---

---

---

---

---

---

---

---

---

---

---

---















---

---

---

---

---

---

---

---

---

---

---

---

---

---

---

---

---







Blank writing area with 18 horizontal lines.

Blank writing area with 1 horizontal line.

Blank writing area with 10 horizontal lines.





---

---

---

---

---

---

---

---

---



---

---

---

---

---

---

---

---

---













---

---

---

---

---

---

---

---

---

---

---

---

---

---

---

---

---









Blank writing area with 18 horizontal lines.

Blank writing area with 1 horizontal line.

Blank writing area with 10 horizontal lines.





---

---

---

---

---

---

---

---

---

---

---

---

---

---

---

---

---

---















---

---

---

---

---

---

---

---

---

---

---

---

---

---

---

---

---







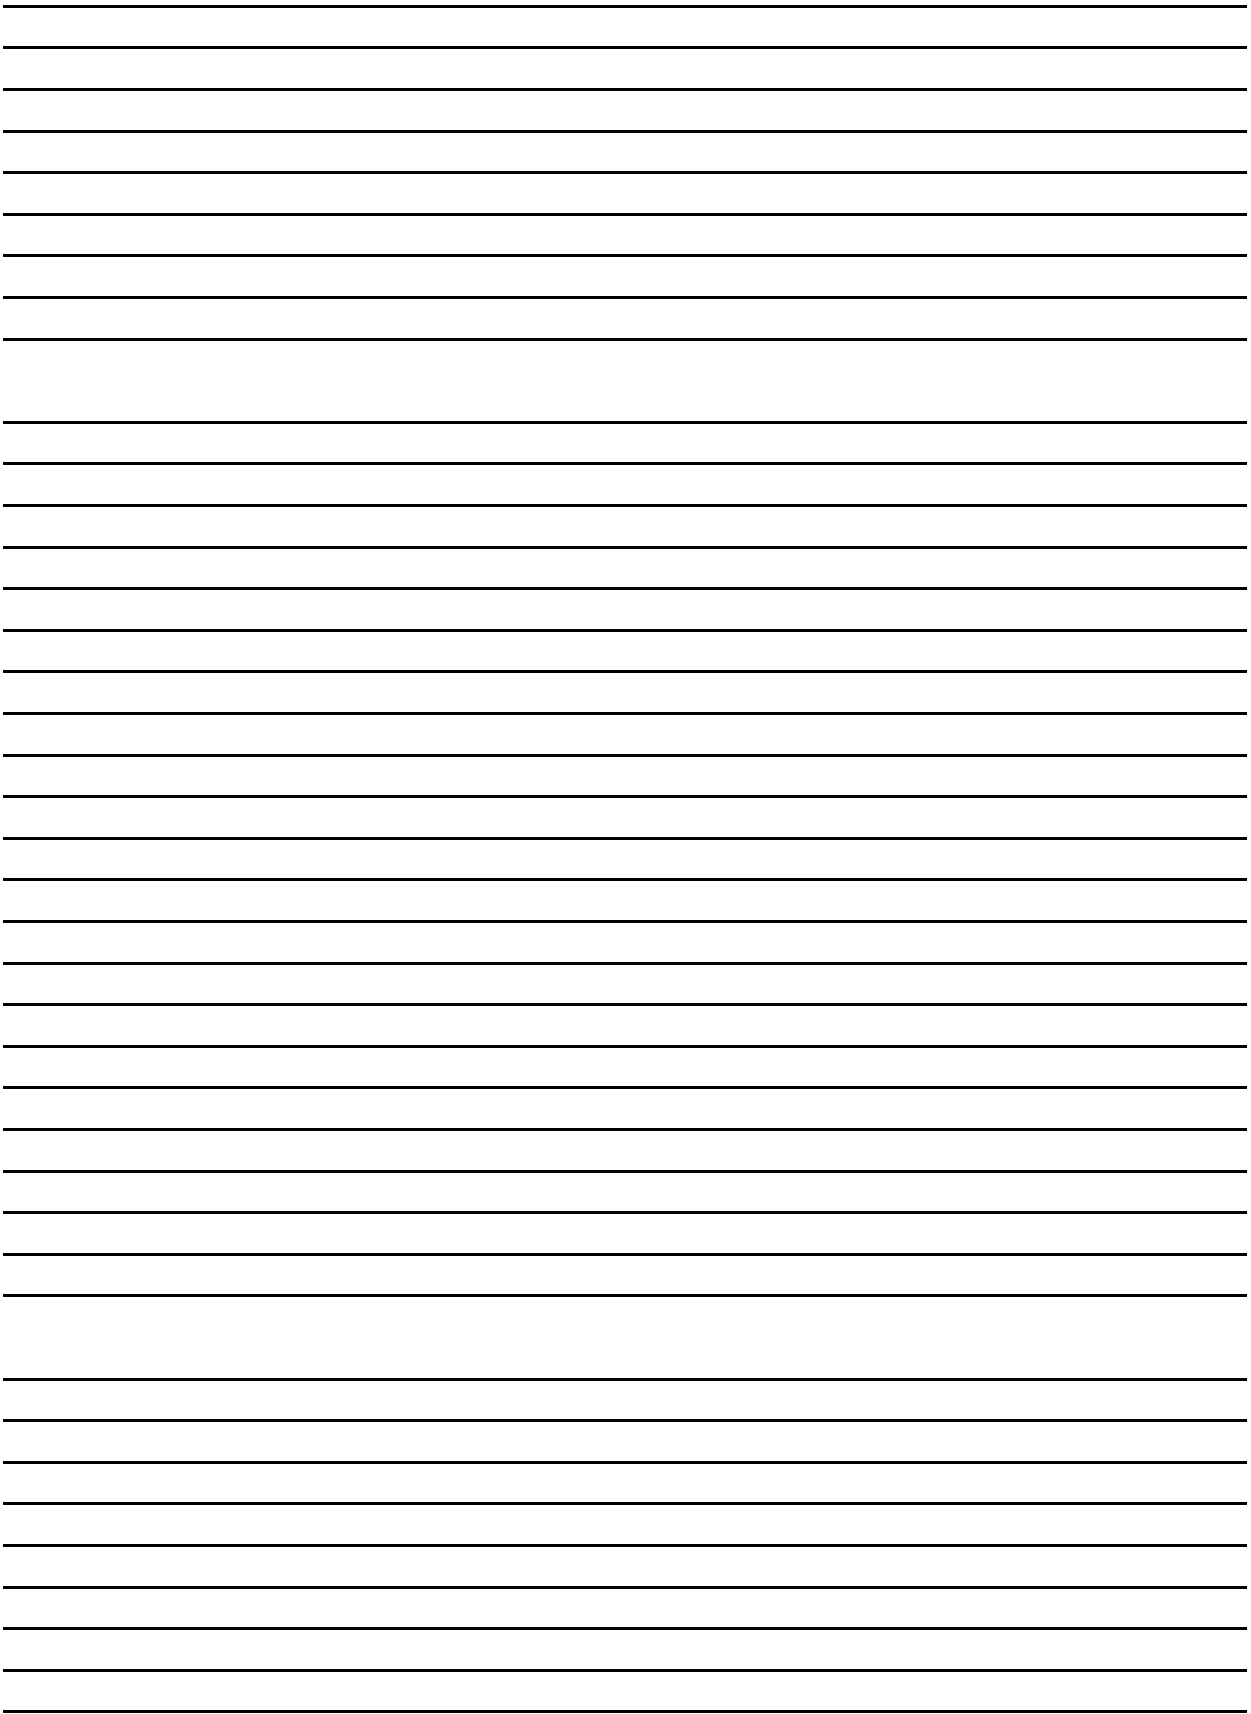

Blank writing area with 18 horizontal lines.

Blank writing area with 1 horizontal line.

Blank writing area with 10 horizontal lines.





---

---

---

---

---

---

---

---

---

---

---

---

---

---

---

---

---

---















---

---

---

---

---

---

---

---

---

---

---

---

---

---

---

---

---









Blank writing area with 18 horizontal lines.

Blank writing area with 1 horizontal line.

Blank writing area with 10 horizontal lines.





---

---

---

---

---

---

---

---

---

---

---

---

---

---

---

---

---

---















---

---

---

---

---

---

---

---

---

---

---

---

---

---

---

---

---















---

---

---

---

---

---

---

---

---

---

---

---

---

---

---

---

---

---















---

---

---

---

---

---

---

---

---

---

---

---

---

---

---

---

---







Blank writing area with 18 horizontal lines.

Blank writing area with 1 horizontal line.

Blank writing area with 10 horizontal lines.







---

---

---

---

---

---

---

---

---

---

---

---

---

---

---

---

---

---















---

---

---

---

---

---

---

---

---

---

---

---

---

---

---

---

---







Blank writing area with 18 horizontal lines.

Blank writing area with 1 horizontal line.

Blank writing area with 10 horizontal lines.







---

---

---

---

---

---

---

---

---

---

---

---

---

---

---

---

---

---















---

---

---

---

---

---

---

---

---

---

---

---

---

---

---

---

---







Blank writing area with 18 horizontal lines.

Blank writing area with 1 horizontal line.

Blank writing area with 10 horizontal lines.







---

---

---

---

---

---

---

---

---

---

---

---

---

---

---

---

---

---















---

---

---

---

---

---

---

---

---

---

---

---

---

---

---

---

---







Blank writing area with 18 horizontal lines.

Blank writing area with 1 horizontal line.

Blank writing area with 10 horizontal lines.





---

---

---

---

---

---

---

---

---



---

---

---

---

---

---

---

---

---













---

---

---

---

---

---

---

---

---

---

---

---

---

---

---

---

---









Blank writing area with 18 horizontal lines.

Blank writing area with 1 horizontal line.

Blank writing area with 10 horizontal lines.





---

---

---

---

---

---

---

---

---

---

---

---

---

---

---

---

---

---















---

---

---

---

---

---

---

---

---

---

---

---

---

---

---

---

---









Blank writing area with 18 horizontal lines.

Blank writing area with 1 horizontal line.

Blank writing area with 10 horizontal lines.





---

---

---

---

---

---

---

---

---

---

---

---

---

---

---

---

---

---















---

---

---

---

---

---

---

---

---

---

---

---

---

---

---

---

---









Blank writing area with 18 horizontal lines.

Blank writing area with 1 horizontal line.

Blank writing area with 10 horizontal lines.





---

---

---

---

---

---

---

---

---

---

---

---

---

---

---

---

---

---















---

---

---

---

---

---

---

---

---

---

---

---

---

---

---

---

---









Blank writing area with 18 horizontal lines.

Blank writing area with 1 horizontal line.

Blank writing area with 10 horizontal lines.





---

---

---

---

---

---

---

---

---

---

---

---

---

---

---

---

---

---

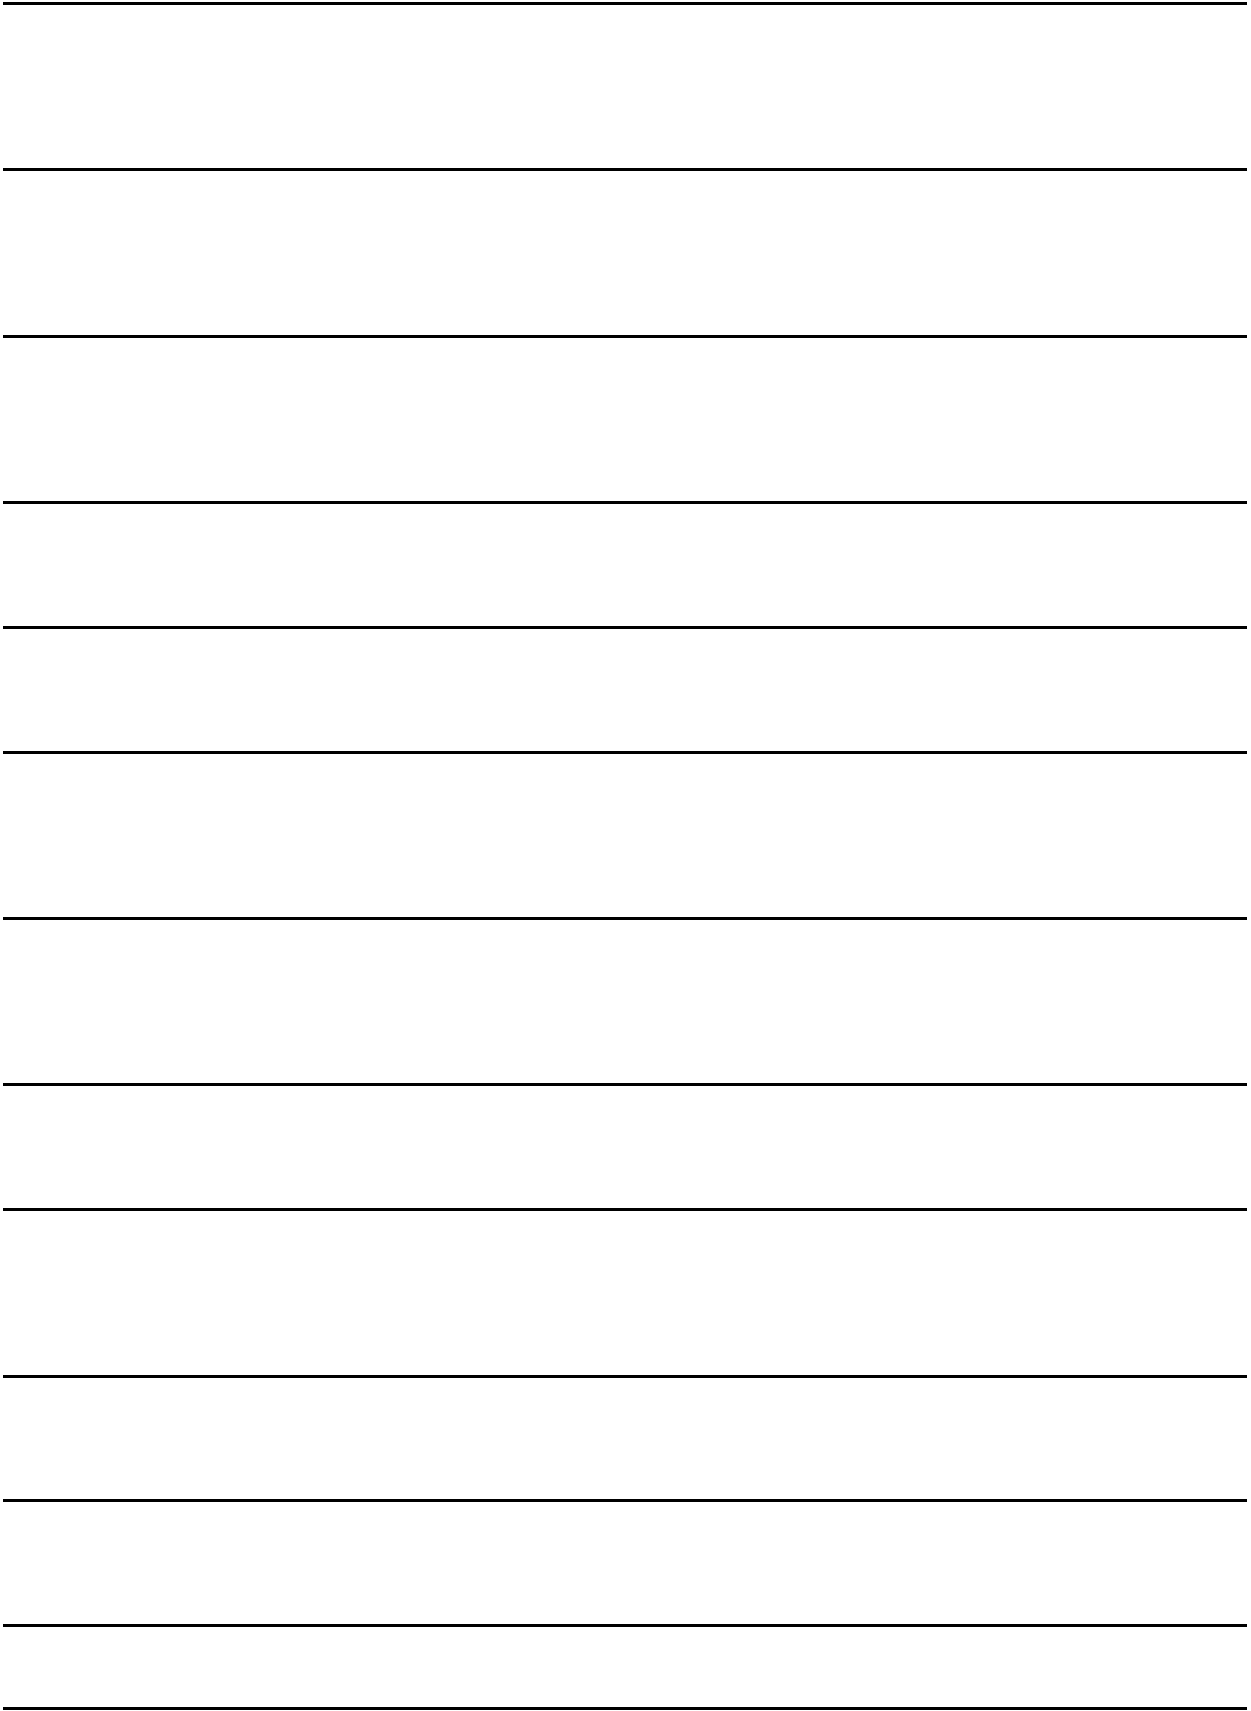













---

---

---

---

---

---

---

---

---

---

---

---

---

---

---

---

---







Blank writing area with 18 horizontal lines.

Blank writing area with 1 horizontal line.

Blank writing area with 10 horizontal lines.







---

---

---

---

---

---

---

---

---

---

---

---

---

---

---

---

---

---















---

---

---

---

---

---

---

---

---

---

---

---

---

---

---

---

---







Blank writing area with 18 horizontal lines.

Blank writing area with 1 horizontal line.

Blank writing area with 10 horizontal lines.
